# Supplementary material for: In a Neotropical Periurban Park, Fruit Consumption by Birds Seems to Be a Random Process
Source: Frontiers journal article supplement (doi:10.3389/fevo.2021.630150), 2021-09-21
Supplement: Data_Sheet_1.XLSX [file Data_Sheet_1.XLSX]

## Sheet: Cestru01
179.25	-2440.4
179.63	-2440.4
180.01	-2440.4
180.38	-8009.22
180.76	-2055.58
181.14	-3387.37
181.51	-3566.3
181.89	-3650.59
182.27	-3901.4
182.65	-3958.8
183.02	-3682.68
183.4	-3415.95
183.78	-3574.89
184.15	-3274.8
184.53	-3412.4
184.91	-3092.51
185.28	-2713.72
185.66	-2498.78
186.04	-2291.42
186.41	-1697.55
186.79	-1260.47
187.17	-1070.42
187.54	-957.216
187.92	-819.557
188.3	-741.621
188.67	-668.937
189.05	-600.125
189.43	-541.142
189.8	-500.684
190.18	-481.672
190.56	-478.326
190.93	-485.582
191.31	-490.141
191.69	-485.849
192.06	-489.463
192.44	-486.658
192.82	-479.277
193.19	-482.276
193.57	-488.092
193.95	-495.847
194.32	-481.176
194.7	-481.379
195.07	-484.578
195.45	-486.277
195.83	-484.064
196.2	-480.744
196.58	-494.677
196.96	-495.131
197.33	-489.365
197.71	-489.216
198.08	-481.396
198.46	-477.463
198.84	-482.47
199.21	-470.549
199.59	-473.412
199.96	-469.388
200.34	-475.884
200.72	-456.014
201.09	-457.253
201.47	-458.286
201.84	-443.408
202.22	-445.59
202.6	-452.905
202.97	-435.743
203.35	-438.476
203.72	-427.664
204.1	-424.641
204.48	-418.348
204.85	-413.918
205.23	-407.721
205.6	-403.516
205.98	-407.273
206.35	-398.889
206.73	-392.73
207.11	-397.339
207.48	-393.966
207.86	-397.999
208.23	-404.645
208.61	-407.243
208.98	-409.697
209.36	-412.201
209.73	-411.603
210.11	-418.54
210.49	-420.554
210.86	-418.328
211.24	-415.06
211.61	-411.745
211.99	-412.973
212.36	-407.518
212.74	-401.433
213.11	-401.191
213.49	-401.949
213.86	-405.821
214.24	-398.061
214.61	-397.476
214.99	-399.91
215.36	-403.375
215.74	-406.238
216.12	-397.881
216.49	-393.349
216.87	-395.156
217.24	-392.754
217.62	-388.186
217.99	-383.81
218.37	-382.686
218.74	-379.974
219.12	-379.117
219.49	-376.98
219.87	-369.055
220.24	-370.487
220.62	-369.039
220.99	-365.451
221.37	-363.992
221.74	-360.981
222.11	-352.774
222.49	-346.152
222.86	-337.082
223.24	-325.057
223.61	-316.346
223.99	-312.681
224.36	-302.55
224.74	-292.611
225.11	-284.136
225.49	-275.45
225.86	-264.41
226.24	-258.066
226.61	-246.679
226.99	-236.158
227.36	-225.494
227.73	-210.079
228.11	-194.877
228.48	-175.739
228.86	-153.799
229.23	-130.173
229.61	-109.612
229.98	-93.45
230.36	-80.497
230.73	-72.173
231.1	-66.194
231.48	-61.835
231.85	-58.262
232.23	-55.307
232.6	-53.289
232.97	-52.358
233.35	-52.589
233.72	-53.797
234.1	-55.457
234.47	-56.612
234.85	-56.689
235.22	-55.682
235.59	-54.013
235.97	-52.319
236.34	-50.478
236.72	-48.894
237.09	-47.199
237.46	-45.215
237.84	-43.332
238.21	-41.508
238.58	-40.348
238.96	-39.432
239.33	-38.608
239.71	-37.699
240.08	-36.456
240.45	-34.965
240.83	-32.915
241.2	-30.504
241.57	-27.922
241.95	-24.898
242.32	-21.783
242.7	-18.838
243.07	-16.091
243.44	-13.787
243.82	-11.946
244.19	-10.735
244.56	-9.88
244.94	-9.384
245.31	-9.098
245.68	-8.922
246.06	-8.803
246.43	-8.735
246.8	-8.406
247.18	-7.873
247.55	-7.187
247.92	-6.395
248.3	-5.521
248.67	-4.832
249.04	-4.294
249.42	-3.908
249.79	-3.653
250.16	-3.485
250.54	-3.415
250.91	-3.502
251.28	-3.728
251.65	-4.095
252.03	-4.61
252.4	-5.239
252.77	-5.847
253.15	-6.352
253.52	-6.694
253.89	-6.91
254.27	-7.15
254.64	-7.318
255.01	-7.458
255.38	-7.542
255.76	-7.641
256.13	-7.816
256.5	-8.196
256.87	-8.682
257.25	-9.237
257.62	-9.804
257.99	-10.159
258.37	-10.17
258.74	-9.843
259.11	-9.211
259.48	-8.323
259.86	-7.271
260.23	-6.062
260.6	-4.933
260.97	-4.003
261.35	-3.337
261.72	-2.88
262.09	-2.623
262.46	-2.48
262.84	-2.413
263.21	-2.387
263.58	-2.422
263.95	-2.512
264.32	-2.731
264.7	-3.076
265.07	-3.594
265.44	-4.255
265.81	-4.974
266.19	-5.552
266.56	-5.91
266.93	-6.039
267.3	-6.022
267.67	-5.909
268.05	-5.758
268.42	-5.584
268.79	-5.383
269.16	-5.2
269.53	-5.023
269.9	-4.829
270.28	-4.703
270.65	-4.604
271.02	-4.53
271.39	-4.459
271.76	-4.415
272.14	-4.312
272.51	-4.195
272.88	-4.045
273.25	-3.867
273.62	-3.703
273.99	-3.574
274.37	-3.45
274.74	-3.337
275.11	-3.291
275.48	-3.302
275.85	-3.331
276.22	-3.431
276.59	-3.521
276.97	-3.667
277.34	-3.811
277.71	-3.952
278.08	-4.108
278.45	-4.242
278.82	-4.366
279.19	-4.463
279.57	-4.514
279.94	-4.582
280.31	-4.574
280.68	-4.632
281.05	-4.609
281.42	-4.607
281.79	-4.58
282.16	-4.493
282.53	-4.361
282.91	-4.198
283.28	-4.053
283.65	-3.894
284.02	-3.757
284.39	-3.654
284.76	-3.517
285.13	-3.421
285.5	-3.299
285.87	-3.142
286.24	-2.994
286.61	-2.846
286.99	-2.703
287.36	-2.542
287.73	-2.465
288.1	-2.397
288.47	-2.333
288.84	-2.31
289.21	-2.305
289.58	-2.318
289.95	-2.353
290.32	-2.394
290.69	-2.454
291.06	-2.537
291.43	-2.582
291.8	-2.569
292.17	-2.538
292.54	-2.546
292.91	-2.543
293.28	-2.551
293.65	-2.562
294.02	-2.588
294.4	-2.639
294.77	-2.686
295.14	-2.702
295.51	-2.768
295.88	-2.792
296.25	-2.781
296.62	-2.726
296.99	-2.587
297.36	-2.393
297.73	-2.16
298.1	-1.9
298.47	-1.641
298.84	-1.43
299.21	-1.301
299.58	-1.191
299.95	-1.158
300.32	-1.159
300.69	-1.159
301.06	-1.213
301.42	-1.291
301.79	-1.395
302.16	-1.573
302.53	-1.775
302.9	-2.002
303.27	-2.161
303.64	-2.306
304.01	-2.382
304.38	-2.416
304.75	-2.432
305.12	-2.401
305.49	-2.386
305.86	-2.39
306.23	-2.381
306.6	-2.394
306.97	-2.406
307.34	-2.473
307.71	-2.491
308.08	-2.523
308.45	-2.555
308.81	-2.573
309.18	-2.603
309.55	-2.582
309.92	-2.535
310.29	-2.456
310.66	-2.341
311.03	-2.183
311.4	-2.027
311.77	-1.896
312.14	-1.765
312.51	-1.65
312.87	-1.595
313.24	-1.568
313.61	-1.592
313.98	-1.671
314.35	-1.791
314.72	-1.967
315.09	-2.17
315.46	-2.389
315.83	-2.629
316.19	-2.903
316.56	-3.2
316.93	-3.471
317.3	-3.75
317.67	-4.002
318.04	-4.144
318.41	-4.275
318.77	-4.342
319.14	-4.436
319.51	-4.514
319.88	-4.59
320.25	-4.668
320.62	-4.747
320.99	-4.845
321.35	-4.945
321.72	-5.044
322.09	-5.223
322.46	-5.367
322.83	-5.509
323.19	-5.622
323.56	-5.712
323.93	-5.774
324.3	-5.782
324.67	-5.748
325.04	-5.682
325.4	-5.572
325.77	-5.443
326.14	-5.305
326.51	-5.18
326.88	-5.08
327.24	-4.97
327.61	-4.865
327.98	-4.835
328.35	-4.83
328.71	-4.828
329.08	-4.873
329.45	-4.936
329.82	-5.007
330.19	-5.081
330.55	-5.15
330.92	-5.213
331.29	-5.299
331.66	-5.412
332.02	-5.479
332.39	-5.532
332.76	-5.604
333.13	-5.611
333.49	-5.599
333.86	-5.575
334.23	-5.553
334.6	-5.472
334.96	-5.45
335.33	-5.398
335.7	-5.324
336.07	-5.268
336.43	-5.188
336.8	-5.116
337.17	-5.072
337.53	-5.009
337.9	-4.979
338.27	-4.918
338.64	-4.911
339	-4.865
339.37	-4.868
339.74	-4.879
340.1	-4.848
340.47	-4.842
340.84	-4.856
341.2	-4.866
341.57	-4.893
341.94	-4.883
342.3	-4.884
342.67	-4.851
343.04	-4.828
343.4	-4.792
343.77	-4.758
344.14	-4.722
344.5	-4.724
344.87	-4.659
345.24	-4.578
345.6	-4.506
345.97	-4.44
346.34	-4.374
346.7	-4.318
347.07	-4.246
347.44	-4.168
347.8	-4.122
348.17	-4.095
348.54	-4.061
348.9	-4.057
349.27	-4.099
349.63	-4.119
350	-4.12
350.37	-4.119
350.73	-4.108
351.1	-4.12
351.46	-4.105
351.83	-4.068
352.2	-4.061
352.56	-4.022
352.93	-4
353.29	-3.927
353.66	-3.859
354.03	-3.806
354.39	-3.734
354.76	-3.696
355.12	-3.622
355.49	-3.573
355.86	-3.51
356.22	-3.4
356.59	-3.274
356.95	-3.127
357.32	-2.999
357.68	-2.876
358.05	-2.728
358.41	-2.588
358.78	-2.439
359.15	-2.312
359.51	-2.177
359.88	-2.073
360.24	-1.973
360.61	-1.881
360.97	-1.762
361.34	-1.617
361.7	-1.47
362.07	-1.322
362.43	-1.15
362.8	-0.968
363.16	-0.794
363.53	-0.666
363.89	-0.524
364.26	-0.415
364.62	-0.311
364.99	-0.239
365.35	-0.189
365.72	-0.137
366.08	-0.092
366.45	-0.06
366.81	-0.049
367.18	-0.039
367.54	0.006
367.91	0.059
368.27	0.141
368.64	0.222
369	0.32
369.37	0.426
369.73	0.517
370.1	0.613
370.46	0.701
370.83	0.808
371.19	0.924
371.55	1.049
371.92	1.212
372.28	1.366
372.65	1.543
373.01	1.7
373.38	1.846
373.74	2
374.11	2.15
374.47	2.305
374.83	2.456
375.2	2.606
375.56	2.74
375.93	2.859
376.29	3.011
376.65	3.162
377.02	3.327
377.38	3.518
377.75	3.707
378.11	3.917
378.47	4.131
378.84	4.322
379.2	4.522
379.57	4.716
379.93	4.886
380.29	5.026
380.66	5.159
381.02	5.288
381.38	5.431
381.75	5.577
382.11	5.697
382.48	5.796
382.84	5.927
383.2	6.043
383.57	6.166
383.93	6.299
384.29	6.457
384.66	6.618
385.02	6.781
385.38	6.942
385.75	7.098
386.11	7.27
386.47	7.441
386.84	7.599
387.2	7.756
387.56	7.917
387.93	8.07
388.29	8.209
388.65	8.349
389.02	8.482
389.38	8.59
389.74	8.701
390.1	8.809
390.47	8.925
390.83	9.037
391.19	9.148
391.56	9.258
391.92	9.387
392.28	9.541
392.64	9.686
393.01	9.804
393.37	9.939
393.73	10.073
394.09	10.186
394.46	10.315
394.82	10.432
395.18	10.551
395.55	10.679
395.91	10.785
396.27	10.863
396.63	10.951
396.99	11.048
397.36	11.147
397.72	11.228
398.08	11.312
398.44	11.373
398.81	11.455
399.17	11.528
399.53	11.596
399.89	11.678
400.25	11.757
400.62	11.834
400.98	11.918
401.34	11.98
401.7	12.061
402.06	12.14
402.43	12.232
402.79	12.31
403.15	12.383
403.51	12.444
403.87	12.509
404.24	12.587
404.6	12.664
404.96	12.742
405.32	12.84
405.68	12.922
406.04	13.009
406.41	13.086
406.77	13.171
407.13	13.26
407.49	13.344
407.85	13.424
408.21	13.495
408.57	13.558
408.94	13.628
409.3	13.662
409.66	13.711
410.02	13.762
410.38	13.829
410.74	13.887
411.1	13.94
411.46	14.01
411.83	14.068
412.19	14.142
412.55	14.209
412.91	14.265
413.27	14.33
413.63	14.41
413.99	14.473
414.35	14.532
414.71	14.595
415.07	14.661
415.43	14.723
415.8	14.791
416.16	14.872
416.52	14.944
416.88	15.034
417.24	15.134
417.6	15.226
417.96	15.335
418.32	15.424
418.68	15.519
419.04	15.616
419.4	15.73
419.76	15.835
420.12	15.926
420.48	16.022
420.84	16.109
421.2	16.205
421.56	16.28
421.92	16.352
422.28	16.419
422.64	16.488
423	16.563
423.36	16.627
423.72	16.7
424.08	16.764
424.44	16.822
424.8	16.872
425.16	16.921
425.52	16.985
425.88	17.055
426.24	17.132
426.6	17.209
426.96	17.275
427.32	17.332
427.68	17.383
428.04	17.436
428.4	17.499
428.76	17.569
429.12	17.637
429.48	17.698
429.84	17.759
430.2	17.819
430.56	17.854
430.92	17.891
431.28	17.946
431.64	17.998
432	18.055
432.35	18.11
432.71	18.181
433.07	18.249
433.43	18.319
433.79	18.384
434.15	18.457
434.51	18.55
434.87	18.641
435.23	18.724
435.59	18.815
435.95	18.897
436.3	18.984
436.66	19.064
437.02	19.147
437.38	19.23
437.74	19.318
438.1	19.409
438.46	19.484
438.82	19.562
439.17	19.64
439.53	19.698
439.89	19.757
440.25	19.803
440.61	19.855
440.97	19.915
441.33	19.976
441.68	20.028
442.04	20.091
442.4	20.16
442.76	20.221
443.12	20.283
443.48	20.343
443.83	20.408
444.19	20.484
444.55	20.549
444.91	20.6
445.27	20.643
445.62	20.691
445.98	20.716
446.34	20.744
446.7	20.759
447.06	20.76
447.41	20.771
447.77	20.785
448.13	20.801
448.49	20.84
448.84	20.886
449.2	20.948
449.56	21.012
449.92	21.078
450.28	21.142
450.63	21.211
450.99	21.296
451.35	21.374
451.71	21.455
452.06	21.523
452.42	21.57
452.78	21.607
453.14	21.625
453.49	21.635
453.85	21.658
454.21	21.678
454.56	21.708
454.92	21.719
455.28	21.738
455.64	21.758
455.99	21.771
456.35	21.806
456.71	21.852
457.06	21.888
457.42	21.928
457.78	21.978
458.13	22.014
458.49	22.038
458.85	22.075
459.2	22.109
459.56	22.136
459.92	22.165
460.27	22.159
460.63	22.144
460.99	22.157
461.34	22.195
461.7	22.222
462.06	22.269
462.41	22.317
462.77	22.359
463.13	22.396
463.48	22.433
463.84	22.482
464.2	22.549
464.55	22.628
464.91	22.705
465.26	22.768
465.62	22.8
465.98	22.806
466.33	22.826
466.69	22.84
467.04	22.869
467.4	22.884
467.76	22.896
468.11	22.913
468.47	22.94
468.82	22.972
469.18	22.996
469.53	23.045
469.89	23.088
470.25	23.111
470.6	23.138
470.96	23.162
471.31	23.188
471.67	23.224
472.02	23.267
472.38	23.287
472.74	23.309
473.09	23.323
473.45	23.333
473.8	23.351
474.16	23.375
474.51	23.409
474.87	23.442
475.22	23.481
475.58	23.514
475.93	23.531
476.29	23.553
476.64	23.575
477	23.594
477.35	23.594
477.71	23.598
478.06	23.606
478.42	23.607
478.77	23.597
479.13	23.589
479.48	23.585
479.84	23.588
480.19	23.6
480.55	23.615
480.9	23.632
481.25	23.658
481.61	23.672
481.96	23.679
482.32	23.687
482.67	23.696
483.03	23.702
483.38	23.699
483.74	23.694
484.09	23.719
484.44	24.195
484.8	25.488
485.15	26.925
485.51	27.707
485.86	27.839
486.22	27.754
486.57	27.683
486.92	27.645
487.28	27.617
487.63	27.598
487.99	27.623
488.34	27.514
488.69	26.887
489.05	25.945
489.4	25.263
489.75	25.005
490.11	24.971
490.46	24.985
490.82	25.011
491.17	25.048
491.52	25.094
491.88	25.103
492.23	25.023
492.58	24.913
492.94	24.849
493.29	24.786
493.64	24.787
494	24.812
494.35	24.841
494.7	24.869
495.06	24.9
495.41	24.936
495.76	24.992
496.12	25.045
496.47	25.012
496.82	24.9
497.17	24.866
497.53	24.855
497.88	24.836
498.23	24.818
498.59	24.813
498.94	24.814
499.29	24.821
499.64	24.832
500	24.85
500.35	24.867
500.7	24.887
501.05	24.916
501.41	24.961
501.76	25.007
502.11	25.05
502.46	25.083
502.82	25.105
503.17	25.136
503.52	25.164
503.87	25.195
504.23	25.211
504.58	25.215
504.93	25.216
505.28	25.214
505.63	25.219
505.99	25.224
506.34	25.236
506.69	25.255
507.04	25.265
507.39	25.278
507.75	25.294
508.1	25.308
508.45	25.323
508.8	25.329
509.15	25.334
509.5	25.325
509.86	25.316
510.21	25.306
510.56	25.305
510.91	25.308
511.26	25.312
511.61	25.315
511.97	25.327
512.32	25.344
512.67	25.374
513.02	25.388
513.37	25.414
513.72	25.43
514.07	25.455
514.42	25.475
514.78	25.496
515.13	25.515
515.48	25.529
515.83	25.541
516.18	25.564
516.53	25.578
516.88	25.607
517.23	25.623
517.58	25.644
517.93	25.635
518.28	25.617
518.64	25.603
518.99	25.57
519.34	25.53
519.69	25.486
520.04	25.452
520.39	25.437
520.74	25.435
521.09	25.445
521.44	25.456
521.79	25.474
522.14	25.497
522.49	25.512
522.84	25.54
523.19	25.582
523.54	25.631
523.89	25.668
524.24	25.696
524.59	25.712
524.94	25.72
525.29	25.726
525.64	25.724
525.99	25.699
526.34	25.668
526.69	25.628
527.04	25.602
527.39	25.592
527.74	25.587
528.09	25.589
528.44	25.59
528.79	25.585
529.14	25.75
529.49	26.427
529.84	27.454
530.19	28.252
530.54	28.62
530.89	28.708
531.24	28.711
531.59	28.711
531.93	28.718
532.28	28.742
532.63	28.806
532.98	28.802
533.33	28.354
533.68	27.419
534.03	26.529
534.38	26.095
534.73	26.011
535.08	26.002
535.43	26.004
535.77	26.01
536.12	26.024
536.47	26.04
536.82	26.053
537.17	26.057
537.52	26.058
537.87	26.049
538.22	25.982
538.56	25.901
538.91	25.875
539.26	25.875
539.61	25.877
539.96	25.882
540.31	25.889
540.65	25.903
541	25.928
541.35	25.953
541.7	25.961
542.05	25.994
542.4	26.179
542.74	26.432
543.09	26.551
543.44	26.564
543.79	26.559
544.14	26.546
544.48	26.538
544.83	26.539
545.18	26.554
545.53	26.594
545.87	26.621
546.22	26.512
546.57	26.3
546.92	26.149
547.26	26.099
547.61	26.071
547.96	26.047
548.31	26.036
548.65	26.05
549	26.064
549.35	26.075
549.7	26.102
550.04	26.129
550.39	26.158
550.74	26.203
551.09	26.246
551.43	26.287
551.78	26.359
552.13	26.418
552.47	26.445
552.82	26.455
553.17	26.44
553.51	26.405
553.86	26.382
554.21	26.357
554.55	26.351
554.9	26.346
555.25	26.361
555.59	26.361
555.94	26.356
556.29	26.369
556.63	26.392
556.98	26.424
557.33	26.454
557.67	26.491
558.02	26.52
558.37	26.54
558.71	26.554
559.06	26.548
559.4	26.55
559.75	26.566
560.1	26.574
560.44	26.574
560.79	26.582
561.14	26.591
561.48	26.589
561.83	26.596
562.17	26.587
562.52	26.575
562.86	26.577
563.21	26.59
563.56	26.597
563.9	26.597
564.25	26.614
564.59	26.623
564.94	26.635
565.28	26.646
565.63	26.654
565.97	26.667
566.32	26.674
566.67	26.67
567.01	26.636
567.36	26.603
567.7	26.585
568.05	26.579
568.39	26.591
568.74	26.606
569.08	26.624
569.43	26.648
569.77	26.671
570.12	26.7
570.46	26.738
570.81	26.784
571.15	26.831
571.5	26.87
571.84	26.889
572.19	26.885
572.53	26.862
572.87	26.834
573.22	26.805
573.56	26.785
573.91	26.778
574.25	26.786
574.6	26.796
574.94	26.808
575.29	26.819
575.63	26.817
575.97	26.824
576.32	26.837
576.66	26.857
577.01	26.888
577.35	26.928
577.7	26.951
578.04	26.958
578.38	26.967
578.73	26.978
579.07	26.99
579.41	27.019
579.76	27.046
580.1	27.089
580.45	27.126
580.79	27.157
581.13	27.167
581.48	27.186
581.82	27.202
582.16	27.204
582.51	27.209
582.85	27.215
583.19	27.221
583.54	27.232
583.88	27.225
584.22	27.216
584.57	27.21
584.91	27.205
585.25	27.209
585.6	27.211
585.94	27.227
586.28	27.222
586.63	27.227
586.97	27.232
587.31	27.226
587.65	27.235
588	27.239
588.34	27.236
588.68	27.244
589.03	27.228
589.37	27.219
589.71	27.21
590.05	27.218
590.4	27.208
590.74	27.198
591.08	27.204
591.42	27.191
591.77	27.194
592.11	27.188
592.45	27.194
592.79	27.194
593.13	27.2
593.48	27.207
593.82	27.214
594.16	27.218
594.5	27.227
594.85	27.213
595.19	27.21
595.53	27.202
595.87	27.206
596.21	27.195
596.55	27.195
596.9	27.191
597.24	27.179
597.58	27.161
597.92	27.135
598.26	27.095
598.6	27.077
598.95	27.078
599.29	27.096
599.63	27.114
599.97	27.131
600.31	27.145
600.65	27.158
600.99	27.169
601.34	27.189
601.68	27.214
602.02	27.257
602.36	27.293
602.7	27.313
603.04	27.301
603.38	27.28
603.72	27.236
604.06	27.207
604.4	27.175
604.74	27.168
605.09	27.126
605.43	27.098
605.77	27.061
606.11	27.037
606.45	27.022
606.79	27.032
607.13	27.04
607.47	27.074
607.81	27.097
608.15	27.115
608.49	27.12
608.83	27.148
609.17	27.182
609.51	27.222
609.85	27.25
610.19	27.253
610.53	27.23
610.87	27.199
611.21	27.164
611.55	27.151
611.89	27.153
612.23	27.158
612.57	27.159
612.91	27.165
613.25	27.169
613.59	27.175
613.93	27.188
614.27	27.213
614.61	27.239
614.95	27.244
615.29	27.234
615.63	27.216
615.97	27.21
616.31	27.204
616.64	27.178
616.98	27.159
617.32	27.155
617.66	27.16
618	27.146
618.34	27.125
618.68	27.113
619.02	27.103
619.36	27.094
619.7	27.073
620.03	27.056
620.37	27.043
620.71	27.03
621.05	27.027
621.39	27.01
621.73	26.996
622.07	26.999
622.41	27.004
622.74	27.005
623.08	27.003
623.42	26.99
623.76	26.982
624.1	26.993
624.44	26.982
624.77	26.965
625.11	26.969
625.45	26.979
625.79	26.965
626.13	26.959
626.46	26.962
626.8	26.956
627.14	26.957
627.48	26.946
627.82	26.925
628.15	26.941
628.49	26.952
628.83	26.945
629.17	26.953
629.5	26.967
629.84	26.987
630.18	26.99
630.52	26.995
630.85	27.003
631.19	27.01
631.53	27.019
631.87	27.02
632.2	27.008
632.54	27.004
632.88	26.974
633.22	26.956
633.55	26.917
633.89	26.887
634.23	26.86
634.56	26.839
634.9	26.822
635.24	26.812
635.57	26.794
635.91	26.795
636.25	26.788
636.58	26.787
636.92	26.792
637.26	26.809
637.59	26.802
637.93	26.804
638.27	26.792
638.6	26.791
638.94	26.793
639.28	26.782
639.61	26.76
639.95	26.748
640.28	26.736
640.62	26.702
640.96	26.667
641.29	26.659
641.63	26.653
641.96	26.641
642.3	26.613
642.64	26.589
642.97	26.575
643.31	26.557
643.64	26.55
643.98	26.527
644.32	26.51
644.65	26.495
644.99	26.467
645.32	26.446
645.66	26.433
645.99	26.417
646.33	26.381
646.66	26.364
647	26.349
647.33	26.317
647.67	26.302
648	26.291
648.34	26.281
648.68	26.287
649.01	26.261
649.35	26.236
649.68	26.218
650.01	26.21
650.35	26.191
650.68	26.183
651.02	26.169
651.35	26.16
651.69	26.157
652.02	26.129
652.36	26.117
652.69	26.125
653.03	26.124
653.36	26.124
653.7	26.114
654.03	26.087
654.36	26.054
654.7	26.046
655.03	26.013
655.37	25.981
655.7	25.951
656.04	25.925
656.37	25.886
656.7	25.839
657.04	25.795
657.37	25.761
657.71	25.737
658.04	25.713
658.37	25.667
658.71	25.638
659.04	25.609
659.37	25.603
659.71	25.582
660.04	25.572
660.37	25.562
660.71	25.565
661.04	25.57
661.37	25.587
661.71	25.6
662.04	25.604
662.37	25.607
662.71	25.603
663.04	25.576
663.37	25.535
663.71	25.487
664.04	25.448
664.37	25.38
664.71	25.291
665.04	25.197
665.37	25.083
665.7	24.983
666.04	24.891
666.37	24.785
666.7	24.702
667.03	24.629
667.37	24.564
667.7	24.505
668.03	24.448
668.36	24.415
668.7	24.353
669.03	24.286
669.36	24.232
669.69	24.17
670.03	24.128
670.36	24.088
670.69	24.031
671.02	23.956
671.35	23.89
671.69	23.849
672.02	23.784
672.35	23.718
672.68	23.666
673.01	23.586
673.35	23.522
673.68	23.45
674.01	23.354
674.34	23.282
674.67	23.211
675	23.123
675.33	23.014
675.67	22.931
676	22.837
676.33	22.765
676.66	22.709
676.99	22.612
677.32	22.518
677.65	22.438
677.98	22.346
678.31	22.268
678.65	22.211
678.98	22.131
679.31	22.054
679.64	21.998
679.97	21.902
680.3	21.828
680.63	21.785
680.96	21.739
681.29	21.7
681.62	21.651
681.95	21.593
682.28	21.526
682.61	21.479
682.94	21.418
683.27	21.346
683.6	21.284
683.93	21.203
684.27	21.111
684.6	21.005
684.93	20.872
685.26	20.733
685.59	20.584
685.92	20.436
686.25	20.269
686.57	20.107
686.9	19.943
687.23	19.781
687.56	19.591
687.89	19.428
688.22	19.264
688.55	19.124
688.88	18.957
689.21	18.796
689.54	18.644
689.87	18.505
690.2	18.349
690.53	18.203
690.86	18.071
691.19	17.916
691.52	17.762
691.85	17.619
692.17	17.448
692.5	17.335
692.83	17.189
693.16	16.993
693.49	16.816
693.82	16.622
694.15	16.434
694.48	16.244
694.81	16.095
695.13	15.902
695.46	15.685
695.79	15.504
696.12	15.292
696.45	15.073
696.78	14.889
697.1	14.684
697.43	14.5
697.76	14.326
698.09	14.145
698.42	13.97
698.75	13.774
699.07	13.653
699.4	13.537
699.73	13.434
700.06	13.412
700.38	13.384
700.71	13.344
701.04	13.331
701.37	13.275
701.7	13.204
702.02	13.098
702.35	12.994
702.68	12.838
703.01	12.632
703.33	12.396
703.66	12.094
703.99	11.747
704.32	11.364
704.64	10.933
704.97	10.51
705.3	10.102
705.62	9.734
705.95	9.39
706.28	9.065
706.6	8.779
706.93	8.53
707.26	8.301
707.58	8.073
707.91	7.889
708.24	7.665
708.56	7.442
708.89	7.227
709.22	7.027
709.54	6.818
709.87	6.63
710.2	6.449
710.52	6.233
710.85	6.03
711.18	5.835
711.5	5.605
711.83	5.394
712.15	5.196
712.48	4.936
712.81	4.713
713.13	4.486
713.46	4.29
713.78	4.095
714.11	3.92
714.44	3.713
714.76	3.523
715.09	3.317
715.41	3.125
715.74	2.966
716.06	2.857
716.39	2.686
716.71	2.514
717.04	2.327
717.37	2.17
717.69	2.001
718.02	1.859
718.34	1.683
718.67	1.511
718.99	1.321
719.32	1.075
719.64	0.825
719.97	0.518
720.29	0.249
720.62	-0.061
720.94	-0.427
721.27	-0.794
721.59	-1.205
721.91	-1.595
722.24	-1.96
722.56	-2.293
722.89	-2.624
723.21	-2.927
723.54	-3.166
723.86	-3.45
724.19	-3.77
724.51	-4.062
724.83	-4.292
725.16	-4.539
725.48	-4.771
725.81	-4.954
726.13	-5.183
726.45	-5.448
726.78	-5.66
727.1	-5.838
727.43	-5.991
727.75	-6.11
728.07	-6.208
728.4	-6.402
728.72	-6.508
729.04	-6.618
729.37	-6.776
729.69	-6.863
730.01	-6.893
730.34	-6.997
730.66	-7.105
730.98	-7.21
731.31	-7.319
731.63	-7.389
731.95	-7.438
732.28	-7.582
732.6	-7.692
732.92	-7.889
733.25	-8.04
733.57	-8.231
733.89	-8.359
734.21	-8.529
734.54	-8.682
734.86	-8.847
735.18	-9.011
735.5	-9.176
735.83	-9.345
736.15	-9.532
736.47	-9.653
736.79	-9.879
737.12	-10.06
737.44	-10.325
737.76	-10.56
738.08	-10.842
738.4	-11.088
738.73	-11.442
739.05	-11.846
739.37	-12.088
739.69	-12.33
740.01	-12.547
740.34	-12.731
740.66	-12.947
740.98	-13.089
741.3	-13.241
741.62	-13.331
741.94	-13.46
742.27	-13.581
742.59	-13.671
742.91	-13.831
743.23	-14.072
743.55	-14.291
743.87	-14.447
744.19	-14.672
744.51	-14.915
744.84	-15.144
745.16	-15.371
745.48	-15.616
745.8	-15.861
746.12	-16.071
746.44	-16.334
746.76	-16.48
747.08	-16.704
747.4	-17.003
747.72	-17.208
748.04	-17.441
748.36	-17.714
748.68	-17.969
749	-18.193
749.33	-18.366
749.65	-18.526
749.97	-18.677
750.29	-18.807
750.61	-18.86
750.93	-18.945
751.25	-18.95
751.57	-19.066
751.89	-19.104
752.21	-19.188
752.53	-19.27
752.85	-19.345
753.17	-19.531
753.49	-19.627
753.8	-19.723
754.12	-19.943
754.44	-20.121
754.76	-20.211
755.08	-20.277
755.4	-20.366
755.72	-20.427
756.04	-20.599
756.36	-20.68
756.68	-20.662
757	-20.742
757.32	-20.908
757.64	-20.961
757.96	-21.077
758.27	-21.31
758.59	-21.481
758.91	-21.678
759.23	-21.894
759.55	-21.922
759.87	-22.15
760.19	-22.346
760.51	-22.437
760.82	-22.518
761.14	-22.566
761.46	-22.516
761.78	-22.586
762.1	-22.506
762.42	-22.417
762.73	-22.375
763.05	-22.313
763.37	-22.186
763.69	-22.1
764.01	-21.983
764.32	-21.763
764.64	-21.383
764.96	-20.892
765.28	-20.162
765.6	-19.581
765.91	-19.055
766.23	-18.616
766.55	-18.333
766.87	-18.136
767.18	-17.954
767.5	-17.868
767.82	-17.86
768.14	-18.001
768.45	-18.289
768.77	-18.729
769.09	-19.221
769.4	-19.817
769.72	-20.467
770.04	-21.064
770.36	-21.535
770.67	-22.028
770.99	-22.559
771.31	-23.076
771.62	-23.435
771.94	-23.787
772.26	-24.204
772.57	-24.595
772.89	-24.944
773.21	-25.26
773.52	-25.488
773.84	-25.828
774.15	-26.187
774.47	-26.424
774.79	-26.544
775.1	-26.847
775.42	-27.098
775.74	-27.234
776.05	-27.405
776.37	-27.628
776.68	-27.805
777	-28.052
777.31	-28.271
777.63	-28.379
777.95	-28.531
778.26	-28.728
778.58	-28.859
778.89	-28.878
779.21	-28.959
779.52	-29.024
779.84	-29.015
780.15	-29.003
780.47	-29.026
780.79	-29.031
781.1	-29.049
781.42	-29.096
781.73	-29.195
782.05	-29.209
782.36	-29.339
782.68	-29.503
782.99	-29.574
783.3	-29.736
783.62	-29.902
783.93	-30.035
784.25	-30.114
784.56	-30.284
784.88	-30.377
785.19	-30.484
785.51	-30.657
785.82	-30.925
786.14	-31.177
786.45	-31.312
786.76	-31.392
787.08	-31.451
787.39	-31.632
787.71	-31.795
788.02	-31.921
788.33	-32.014
788.65	-31.977
788.96	-32.063
789.28	-31.916
789.59	-31.732
789.9	-31.618
790.22	-31.456
790.53	-31.14
790.84	-30.778
791.16	-30.387
791.47	-30.158
791.78	-29.937
792.1	-29.867
792.41	-29.68
792.72	-29.639
793.04	-29.636
793.35	-29.756
793.66	-29.904
793.98	-30.254
794.29	-30.511
794.6	-30.892
794.91	-31.062
795.23	-31.537
795.54	-31.827
795.85	-32.09
796.17	-32.4
796.48	-32.546
796.79	-32.561
797.1	-32.557
797.42	-32.425
797.73	-32.3
798.04	-32.108
798.35	-31.986
798.66	-31.75
798.98	-31.627
799.29	-31.564
799.6	-31.494
799.91	-31.45
800.22	-31.484
800.54	-31.664
800.85	-31.863
801.16	-32.032
801.47	-32.284
801.78	-32.603
802.09	-32.721
802.41	-32.908
802.72	-33.099
803.03	-33.197
803.34	-33.46
803.65	-33.701
803.96	-33.792
804.27	-33.994
804.59	-34.162
804.9	-34.226
805.21	-34.401
805.52	-34.678
805.83	-34.905
806.14	-35.089
806.45	-35.221
806.76	-35.139
807.07	-35.336
807.38	-35.265
807.69	-35.182
808	-35.274
808.31	-35.343
808.63	-35.256
808.94	-35.168
809.25	-35.001
809.56	-35.056
809.87	-35.148
810.18	-35.367
810.49	-35.352
810.8	-35.604
811.11	-35.834
811.42	-36.065
811.73	-36.392
812.04	-36.696
812.35	-37.104
812.66	-37.585
812.97	-37.841
813.28	-38.096
813.58	-38.334
813.89	-38.561
814.2	-38.732
814.51	-38.869
814.82	-39.054
815.13	-39.243
815.44	-39.423
815.75	-39.523
816.06	-39.573
816.37	-39.594
816.68	-39.575
816.99	-39.657
817.3	-39.907
817.6	-40.014
817.91	-40.063
818.22	-39.976
818.53	-39.918
818.84	-39.885
819.15	-39.694
819.46	-39.526
819.76	-39.444
820.07	-39.161
820.38	-38.858
820.69	-38.158
821	-37.569
821.31	-36.724
821.61	-35.831
821.92	-34.628
822.23	-33.346
822.54	-31.996
822.85	-30.446
823.15	-28.585
823.46	-26.328
823.77	-23.512
824.08	-20.952
824.38	-18.883
824.69	-17.521
825	-16.621
825.31	-16.071
825.61	-15.723
825.92	-15.492
826.23	-15.388
826.54	-15.363
826.84	-15.419
827.15	-15.619
827.46	-15.997
827.76	-16.65
828.07	-17.478
828.38	-18.335
828.69	-19.001
828.99	-19.417
829.3	-19.584
829.61	-19.597
829.91	-19.655
830.22	-19.753
830.52	-19.872
830.83	-20.096
831.14	-20.333
831.44	-20.665
831.75	-21.132
832.06	-21.885
832.36	-23.02
832.67	-24.572
832.97	-26.487
833.28	-28.3
833.59	-29.992
833.89	-31.507
834.2	-32.728
834.5	-33.481
834.81	-33.588
835.12	-32.82
835.42	-31.486
835.73	-29.639
836.03	-28.072
836.34	-26.835
836.64	-26.014
836.95	-25.506
837.25	-25.127
837.56	-24.802
837.86	-24.786
838.17	-24.94
838.47	-25.472
838.78	-26.347
839.08	-27.74
839.39	-29.475
839.69	-31.416
840	-33.359
840.3	-35.36
840.61	-37.478
840.91	-39.545
841.22	-41.206
841.52	-42.553
841.83	-43.206
842.13	-43.466
842.43	-43.497
842.74	-43.37
843.04	-43.393
843.35	-43.609
843.65	-43.597
843.96	-43.682
844.26	-44.015
844.56	-44.588
844.87	-45.421
845.17	-46.872
845.47	-48.759
845.78	-50.943
846.08	-53.527
846.39	-55.619
846.69	-57.54
846.99	-59.462
847.3	-61.148
847.6	-62.958
847.9	-64.209
848.21	-65.881
848.51	-67.198
848.81	-68.258
849.11	-69.364
849.42	-69.797
849.72	-70.633
850.02	-71.431
850.33	-72.085
850.63	-72.415
850.93	-72.814
851.23	-73.632
851.54	-73.631
851.84	-74.017
852.14	-74.435
852.44	-74.68
852.75	-75.023
853.05	-75.229
853.35	-75.354
853.65	-75.733
853.96	-76.315
854.26	-76.167
854.56	-76.226
854.86	-76.793
855.16	-77.093
855.47	-77.458
855.77	-78.015
856.07	-78.345
856.37	-78.461
856.67	-78.887
856.97	-78.647
857.28	-79.388
857.58	-80.432
857.88	-81.247
858.18	-81.522
858.48	-81.537
858.78	-81.716
859.08	-81.404
859.38	-81.764
859.69	-82.172
859.99	-81.747
860.29	-82.017
860.59	-81.87
860.89	-81.491
861.19	-81.022
861.49	-81.309
861.79	-81.958
862.09	-82.112
862.39	-82.451
862.69	-82.621
862.99	-82.731
863.29	-83.289
863.59	-83.796
863.89	-83.972
864.19	-84.003
864.49	-84.415
864.79	-84.5
865.09	-84.453
865.39	-84.281
865.69	-84.349
865.99	-84.212
866.29	-83.826
866.59	-83.438
866.89	-82.909
867.19	-82.523
867.49	-82.693
867.79	-82.734
868.09	-82.239
868.39	-81.841
[truncated: 48 more rows]

## Sheet: Cestru02
179.25	-2541.52
179.63	-2541.52
180.01	-2541.52
180.38	-8257.45
180.76	-2094.52
181.14	-3519.47
181.51	-3705.06
181.89	-3782.02
182.27	-4036.48
182.65	-4102.41
183.02	-3824.1
183.4	-3554.62
183.78	-3709.5
184.15	-3392.04
184.53	-3525.22
184.91	-3204.77
185.28	-2808.96
185.66	-2580.67
186.04	-2377.26
186.41	-1759.07
186.79	-1305.33
187.17	-1107.39
187.54	-989.456
187.92	-850.775
188.3	-770.852
188.67	-694.864
189.05	-620.981
189.43	-560.483
189.8	-520.045
190.18	-498.5
190.56	-496.662
190.93	-504.885
191.31	-510.447
191.69	-504.929
192.06	-507.834
192.44	-505.003
192.82	-496.334
193.19	-501.05
193.57	-506.906
193.95	-515.186
194.32	-502.2
194.7	-502.457
195.07	-505.739
195.45	-507.414
195.83	-504.187
196.2	-500.054
196.58	-515.204
196.96	-517.546
197.33	-511.93
197.71	-511.097
198.08	-500.453
198.46	-493.38
198.84	-496.453
199.21	-482.983
199.59	-485.617
199.96	-483.093
200.34	-488.937
200.72	-468.109
201.09	-468.577
201.47	-469.014
201.84	-455.942
202.22	-458.081
202.6	-468.538
202.97	-452.621
203.35	-455.314
203.72	-444.071
204.1	-440.139
204.48	-434.211
204.85	-428.65
205.23	-421.834
205.6	-417.465
205.98	-419.19
206.35	-412.687
206.73	-404.159
207.11	-408.323
207.48	-405.013
207.86	-408.662
208.23	-415.281
208.61	-416.472
208.98	-418.9
209.36	-421.596
209.73	-420.932
210.11	-429.428
210.49	-429.824
210.86	-426.819
211.24	-423.339
211.61	-420.702
211.99	-422.161
212.36	-417.928
212.74	-412.918
213.11	-413.154
213.49	-414.425
213.86	-417.667
214.24	-407.707
214.61	-408.157
214.99	-413.174
215.36	-415.912
215.74	-418.751
216.12	-411.648
216.49	-406.762
216.87	-408.947
217.24	-408.068
217.62	-403.108
217.99	-399.658
218.37	-400.198
218.74	-397.337
219.12	-394.643
219.49	-392.033
219.87	-382.887
220.24	-382.931
220.62	-382.126
220.99	-378.863
221.37	-376.435
221.74	-373.022
222.11	-364.227
222.49	-357.371
222.86	-348.512
223.24	-336.409
223.61	-328.947
223.99	-326.148
224.36	-315.509
224.74	-304.312
225.11	-294.929
225.49	-286.326
225.86	-274.978
226.24	-268.492
226.61	-256.901
226.99	-245.747
227.36	-234.167
227.73	-217.414
228.11	-201.013
228.48	-181.311
228.86	-158.82
229.23	-134.461
229.61	-112.714
229.98	-95.857
230.36	-82.192
230.73	-73.178
231.1	-66.823
231.48	-62.504
231.85	-58.944
232.23	-55.968
232.6	-53.917
232.97	-52.914
233.35	-53.032
233.72	-54.484
234.1	-56.191
234.47	-57.544
234.85	-57.628
235.22	-56.753
235.59	-55.007
235.97	-53.314
236.34	-51.481
236.72	-49.851
237.09	-48.121
237.46	-46.233
237.84	-44.257
238.21	-42.47
238.58	-41.35
238.96	-40.476
239.33	-39.596
239.71	-38.625
240.08	-37.339
240.45	-35.684
240.83	-33.495
241.2	-30.965
241.57	-28.315
241.95	-25.164
242.32	-21.956
242.7	-18.836
243.07	-16.035
243.44	-13.638
243.82	-11.766
244.19	-10.498
244.56	-9.69
244.94	-9.18
245.31	-8.887
245.68	-8.723
246.06	-8.588
246.43	-8.54
246.8	-8.233
247.18	-7.735
247.55	-7.079
247.92	-6.258
248.3	-5.364
248.67	-4.62
249.04	-4.066
249.42	-3.678
249.79	-3.406
250.16	-3.245
250.54	-3.143
250.91	-3.218
251.28	-3.428
251.65	-3.777
252.03	-4.301
252.4	-4.981
252.77	-5.623
253.15	-6.151
253.52	-6.466
253.89	-6.688
254.27	-6.898
254.64	-7.13
255.01	-7.251
255.38	-7.352
255.76	-7.48
256.13	-7.702
256.5	-8.024
256.87	-8.52
257.25	-9.139
257.62	-9.751
257.99	-10.093
258.37	-10.116
258.74	-9.756
259.11	-9.146
259.48	-8.256
259.86	-7.144
260.23	-5.877
260.6	-4.718
260.97	-3.738
261.35	-3.034
261.72	-2.56
262.09	-2.3
262.46	-2.153
262.84	-2.078
263.21	-2.056
263.58	-2.083
263.95	-2.188
264.32	-2.414
264.7	-2.791
265.07	-3.352
265.44	-4.041
265.81	-4.781
266.19	-5.381
266.56	-5.755
266.93	-5.889
267.3	-5.871
267.67	-5.754
268.05	-5.585
268.42	-5.398
268.79	-5.165
269.16	-4.943
269.53	-4.741
269.9	-4.585
270.28	-4.444
270.65	-4.349
271.02	-4.259
271.39	-4.192
271.76	-4.131
272.14	-4.026
272.51	-3.886
272.88	-3.744
273.25	-3.585
273.62	-3.424
273.99	-3.263
274.37	-3.148
274.74	-3.032
275.11	-3
275.48	-3
275.85	-3.048
276.22	-3.151
276.59	-3.269
276.97	-3.39
277.34	-3.526
277.71	-3.677
278.08	-3.837
278.45	-3.986
278.82	-4.118
279.19	-4.221
279.57	-4.297
279.94	-4.348
280.31	-4.36
280.68	-4.416
281.05	-4.44
281.42	-4.454
281.79	-4.435
282.16	-4.388
282.53	-4.267
282.91	-4.129
283.28	-3.972
283.65	-3.802
284.02	-3.658
284.39	-3.563
284.76	-3.428
285.13	-3.338
285.5	-3.214
285.87	-3.079
286.24	-2.942
286.61	-2.798
286.99	-2.68
287.36	-2.55
287.73	-2.484
288.1	-2.438
288.47	-2.404
288.84	-2.404
289.21	-2.405
289.58	-2.444
289.95	-2.497
290.32	-2.555
290.69	-2.651
291.06	-2.739
291.43	-2.81
291.8	-2.839
292.17	-2.869
292.54	-2.892
292.91	-2.933
293.28	-2.981
293.65	-3.031
294.02	-3.089
294.4	-3.179
294.77	-3.258
295.14	-3.334
295.51	-3.413
295.88	-3.502
296.25	-3.519
296.62	-3.49
296.99	-3.398
297.36	-3.249
297.73	-3.05
298.1	-2.824
298.47	-2.585
298.84	-2.402
299.21	-2.302
299.58	-2.256
299.95	-2.248
300.32	-2.27
300.69	-2.312
301.06	-2.391
301.42	-2.497
301.79	-2.638
302.16	-2.859
302.53	-3.114
302.9	-3.38
303.27	-3.554
303.64	-3.726
304.01	-3.819
304.38	-3.878
304.75	-3.908
305.12	-3.907
305.49	-3.917
305.86	-3.953
306.23	-3.964
306.6	-3.996
306.97	-4.041
307.34	-4.15
307.71	-4.186
308.08	-4.24
308.45	-4.306
308.81	-4.366
309.18	-4.388
309.55	-4.392
309.92	-4.357
310.29	-4.282
310.66	-4.171
311.03	-4.035
311.4	-3.879
311.77	-3.766
312.14	-3.635
312.51	-3.517
312.87	-3.448
313.24	-3.44
313.61	-3.46
313.98	-3.546
314.35	-3.689
314.72	-3.871
315.09	-4.073
315.46	-4.302
315.83	-4.531
316.19	-4.815
316.56	-5.116
316.93	-5.425
317.3	-5.712
317.67	-5.979
318.04	-6.132
318.41	-6.256
318.77	-6.353
319.14	-6.442
319.51	-6.541
319.88	-6.67
320.25	-6.765
320.62	-6.872
320.99	-6.968
321.35	-7.079
321.72	-7.184
322.09	-7.358
322.46	-7.525
322.83	-7.669
323.19	-7.797
323.56	-7.875
323.93	-7.927
324.3	-7.921
324.67	-7.912
325.04	-7.837
325.4	-7.719
325.77	-7.616
326.14	-7.513
326.51	-7.367
326.88	-7.278
327.24	-7.173
327.61	-7.099
327.98	-7.071
328.35	-7.08
328.71	-7.075
329.08	-7.128
329.45	-7.233
329.82	-7.284
330.19	-7.348
330.55	-7.45
330.92	-7.53
331.29	-7.64
331.66	-7.736
332.02	-7.823
332.39	-7.901
332.76	-7.964
333.13	-8.021
333.49	-8.012
333.86	-8.016
334.23	-7.997
334.6	-7.944
334.96	-7.922
335.33	-7.888
335.7	-7.84
336.07	-7.791
336.43	-7.753
336.8	-7.722
337.17	-7.671
337.53	-7.622
337.9	-7.609
338.27	-7.59
338.64	-7.583
339	-7.574
339.37	-7.595
339.74	-7.619
340.1	-7.592
340.47	-7.604
340.84	-7.644
341.2	-7.674
341.57	-7.723
341.94	-7.734
342.3	-7.74
342.67	-7.747
343.04	-7.731
343.4	-7.73
343.77	-7.733
344.14	-7.748
344.5	-7.763
344.87	-7.727
345.24	-7.69
345.6	-7.627
345.97	-7.599
346.34	-7.567
346.7	-7.542
347.07	-7.523
347.44	-7.479
347.8	-7.476
348.17	-7.484
348.54	-7.504
348.9	-7.545
349.27	-7.609
349.63	-7.683
350	-7.751
350.37	-7.805
350.73	-7.857
351.1	-7.915
351.46	-7.946
351.83	-7.973
352.2	-8.008
352.56	-7.99
352.93	-8.019
353.29	-8.006
353.66	-8.008
354.03	-8.023
354.39	-8.02
354.76	-8.021
355.12	-8.023
355.49	-8.037
355.86	-8.013
356.22	-7.978
356.59	-7.932
356.95	-7.845
357.32	-7.796
357.68	-7.727
358.05	-7.623
358.41	-7.534
358.78	-7.454
359.15	-7.366
359.51	-7.316
359.88	-7.291
360.24	-7.273
360.61	-7.26
360.97	-7.222
361.34	-7.147
361.7	-7.079
362.07	-7.002
362.43	-6.914
362.8	-6.805
363.16	-6.727
363.53	-6.676
363.89	-6.606
364.26	-6.566
364.62	-6.531
364.99	-6.544
365.35	-6.592
365.72	-6.64
366.08	-6.708
366.45	-6.789
366.81	-6.915
367.18	-7.026
367.54	-7.079
367.91	-7.137
368.27	-7.148
368.64	-7.188
369	-7.2
369.37	-7.2
369.73	-7.208
370.1	-7.215
370.46	-7.232
370.83	-7.215
371.19	-7.198
371.55	-7.191
371.92	-7.146
372.28	-7.102
372.65	-7.037
373.01	-6.948
373.38	-6.875
373.74	-6.811
374.11	-6.743
374.47	-6.679
374.83	-6.624
375.2	-6.567
375.56	-6.521
375.93	-6.484
376.29	-6.428
376.65	-6.361
377.02	-6.305
377.38	-6.217
377.75	-6.117
378.11	-5.985
378.47	-5.848
378.84	-5.721
379.2	-5.595
379.57	-5.473
379.93	-5.402
380.29	-5.341
380.66	-5.282
381.02	-5.217
381.38	-5.145
381.75	-5.073
382.11	-5.038
382.48	-5.023
382.84	-4.983
383.2	-4.943
383.57	-4.883
383.93	-4.799
384.29	-4.676
384.66	-4.558
385.02	-4.449
385.38	-4.335
385.75	-4.228
386.11	-4.105
386.47	-3.965
386.84	-3.841
387.2	-3.71
387.56	-3.573
387.93	-3.446
388.29	-3.339
388.65	-3.227
389.02	-3.108
389.38	-3.008
389.74	-2.906
390.1	-2.804
390.47	-2.684
390.83	-2.564
391.19	-2.442
391.56	-2.308
391.92	-2.157
392.28	-1.978
392.64	-1.779
393.01	-1.608
393.37	-1.434
393.73	-1.273
394.09	-1.104
394.46	-0.941
394.82	-0.775
395.18	-0.585
395.55	-0.407
395.91	-0.228
396.27	-0.092
396.63	0.029
396.99	0.172
397.36	0.32
397.72	0.49
398.08	0.637
398.44	0.788
398.81	0.967
399.17	1.115
399.53	1.281
399.89	1.463
400.25	1.659
400.62	1.879
400.98	2.078
401.34	2.277
401.7	2.466
402.06	2.676
402.43	2.898
402.79	3.096
403.15	3.309
403.51	3.519
403.87	3.747
404.24	3.997
404.6	4.243
404.96	4.528
405.32	4.799
405.68	5.073
406.04	5.341
406.41	5.589
406.77	5.844
407.13	6.1
407.49	6.343
407.85	6.571
408.21	6.798
408.57	7.009
408.94	7.212
409.3	7.442
409.66	7.664
410.02	7.889
410.38	8.137
410.74	8.405
411.1	8.662
411.46	8.939
411.83	9.198
412.19	9.458
412.55	9.714
412.91	9.963
413.27	10.198
413.63	10.451
413.99	10.699
414.35	10.947
414.71	11.18
415.07	11.438
415.43	11.685
415.8	11.962
416.16	12.232
416.52	12.517
416.88	12.804
417.24	13.091
417.6	13.372
417.96	13.661
418.32	13.926
418.68	14.21
419.04	14.475
419.4	14.768
419.76	15.027
420.12	15.276
420.48	15.52
420.84	15.751
421.2	15.986
421.56	16.206
421.92	16.432
422.28	16.638
422.64	16.836
423	17.043
423.36	17.216
423.72	17.395
424.08	17.571
424.44	17.733
424.8	17.894
425.16	18.06
425.52	18.226
425.88	18.39
426.24	18.566
426.6	18.733
426.96	18.872
427.32	19.017
427.68	19.152
428.04	19.286
428.4	19.43
428.76	19.589
429.12	19.726
429.48	19.876
429.84	20.021
430.2	20.156
430.56	20.275
430.92	20.4
431.28	20.522
431.64	20.635
432	20.742
432.35	20.854
432.71	20.974
433.07	21.101
433.43	21.223
433.79	21.34
434.15	21.456
434.51	21.575
434.87	21.692
435.23	21.811
435.59	21.925
435.95	22.043
436.3	22.158
436.66	22.257
437.02	22.366
437.38	22.478
437.74	22.602
438.1	22.738
438.46	22.871
438.82	22.999
439.17	23.116
439.53	23.214
439.89	23.305
440.25	23.382
440.61	23.461
440.97	23.542
441.33	23.616
441.68	23.689
442.04	23.763
442.4	23.847
442.76	23.927
443.12	24.007
443.48	24.095
443.83	24.181
444.19	24.245
444.55	24.345
444.91	24.431
445.27	24.521
445.62	24.602
445.98	24.663
446.34	24.711
446.7	24.746
447.06	24.767
447.41	24.798
447.77	24.833
448.13	24.897
448.49	24.941
448.84	25.005
449.2	25.076
449.56	25.155
449.92	25.248
450.28	25.343
450.63	25.449
450.99	25.571
451.35	25.679
451.71	25.795
452.06	25.91
452.42	26.004
452.78	26.08
453.14	26.133
453.49	26.185
453.85	26.221
454.21	26.265
454.56	26.301
454.92	26.316
455.28	26.348
455.64	26.366
455.99	26.375
456.35	26.418
456.71	26.463
457.06	26.51
457.42	26.551
457.78	26.606
458.13	26.647
458.49	26.68
458.85	26.731
459.2	26.771
459.56	26.817
459.92	26.853
460.27	26.847
460.63	26.845
460.99	26.844
461.34	26.869
461.7	26.899
462.06	26.942
462.41	26.989
462.77	27.025
463.13	27.061
463.48	27.098
463.84	27.147
464.2	27.214
464.55	27.299
464.91	27.391
465.26	27.468
465.62	27.515
465.98	27.54
466.33	27.583
466.69	27.626
467.04	27.672
467.4	27.695
467.76	27.718
468.11	27.736
468.47	27.753
468.82	27.785
469.18	27.814
469.53	27.864
469.89	27.916
470.25	27.945
470.6	27.966
470.96	27.994
471.31	28.034
471.67	28.074
472.02	28.143
472.38	28.182
472.74	28.229
473.09	28.268
473.45	28.298
473.8	28.326
474.16	28.358
474.51	28.418
474.87	28.468
475.22	28.525
475.58	28.572
475.93	28.605
476.29	28.65
476.64	28.688
477	28.716
477.35	28.741
477.71	28.768
478.06	28.788
478.42	28.792
478.77	28.792
479.13	28.787
479.48	28.795
479.84	28.801
480.19	28.819
480.55	28.829
480.9	28.855
481.25	28.878
481.61	28.905
481.96	28.932
482.32	28.954
482.67	28.976
483.03	28.998
483.38	29.017
483.74	29.037
484.09	29.095
484.44	29.728
484.8	31.334
485.15	33.098
485.51	34.027
485.86	34.156
486.22	34.011
486.57	33.889
486.92	33.818
487.28	33.768
487.63	33.731
487.99	33.756
488.34	33.603
488.69	32.822
489.05	31.66
489.4	30.821
489.75	30.503
490.11	30.471
490.46	30.502
490.82	30.545
491.17	30.593
491.52	30.649
491.88	30.654
492.23	30.548
492.58	30.418
492.94	30.344
493.29	30.267
493.64	30.258
494	30.286
494.35	30.316
494.7	30.348
495.06	30.377
495.41	30.413
495.76	30.466
496.12	30.521
496.47	30.449
496.82	30.28
497.17	30.235
497.53	30.261
497.88	30.278
498.23	30.291
498.59	30.291
498.94	30.308
499.29	30.32
499.64	30.339
500	30.346
500.35	30.366
500.7	30.403
501.05	30.444
501.41	30.502
501.76	30.571
502.11	30.63
502.46	30.692
502.82	30.745
503.17	30.797
503.52	30.849
503.87	30.905
504.23	30.947
504.58	30.967
504.93	30.998
505.28	31.009
505.63	31.027
505.99	31.058
506.34	31.086
506.69	31.116
507.04	31.149
507.39	31.174
507.75	31.189
508.1	31.214
508.45	31.24
508.8	31.255
509.15	31.278
509.5	31.287
509.86	31.284
510.21	31.281
510.56	31.282
510.91	31.295
511.26	31.317
511.61	31.343
511.97	31.364
512.32	31.391
512.67	31.439
513.02	31.471
513.37	31.514
513.72	31.553
514.07	31.604
514.42	31.649
514.78	31.684
515.13	31.722
515.48	31.762
515.83	31.806
516.18	31.852
516.53	31.896
516.88	31.954
517.23	32.011
517.58	32.067
517.93	32.103
518.28	32.125
518.64	32.14
518.99	32.136
519.34	32.106
519.69	32.083
520.04	32.06
520.39	32.04
520.74	32.031
521.09	32.028
521.44	32.041
521.79	32.065
522.14	32.09
522.49	32.12
522.84	32.161
523.19	32.229
523.54	32.29
523.89	32.363
524.24	32.42
524.59	32.484
524.94	32.536
525.29	32.566
525.64	32.579
525.99	32.589
526.34	32.567
526.69	32.545
527.04	32.533
527.39	32.539
527.74	32.543
528.09	32.567
528.44	32.586
528.79	32.623
529.14	32.887
529.49	33.784
529.84	35.091
530.19	36.095
530.54	36.547
530.89	36.634
531.24	36.62
531.59	36.607
531.93	36.607
532.28	36.632
532.63	36.691
532.98	36.656
533.33	36.071
533.68	34.889
534.03	33.801
534.38	33.307
534.73	33.264
535.08	33.293
535.43	33.314
535.77	33.335
536.12	33.358
536.47	33.394
536.82	33.427
537.17	33.44
537.52	33.46
537.87	33.451
538.22	33.347
538.56	33.224
538.91	33.182
539.26	33.192
539.61	33.209
539.96	33.23
540.31	33.246
540.65	33.269
541	33.313
541.35	33.35
541.7	33.391
542.05	33.487
542.4	33.788
542.74	34.162
543.09	34.329
543.44	34.342
543.79	34.324
544.14	34.305
544.48	34.29
544.83	34.276
545.18	34.283
545.53	34.308
545.87	34.316
546.22	34.148
546.57	33.85
546.92	33.67
547.26	33.631
547.61	33.619
547.96	33.615
548.31	33.614
548.65	33.64
549	33.666
549.35	33.696
549.7	33.737
550.04	33.776
550.39	33.824
550.74	33.876
551.09	33.935
551.43	34.008
551.78	34.093
552.13	34.187
552.47	34.251
552.82	34.293
553.17	34.303
553.51	34.278
553.86	34.26
554.21	34.237
554.55	34.223
554.9	34.215
555.25	34.226
555.59	34.237
555.94	34.241
556.29	34.26
556.63	34.295
556.98	34.334
557.33	34.389
557.67	34.453
558.02	34.513
558.37	34.57
558.71	34.613
559.06	34.634
559.4	34.665
559.75	34.684
560.1	34.71
560.44	34.713
560.79	34.748
561.14	34.782
561.48	34.781
561.83	34.787
562.17	34.782
562.52	34.783
562.86	34.796
563.21	34.801
563.56	34.826
563.9	34.837
564.25	34.857
564.59	34.867
564.94	34.873
565.28	34.907
565.63	34.939
565.97	34.964
566.32	34.969
566.67	34.965
567.01	34.939
567.36	34.906
567.7	34.87
568.05	34.844
568.39	34.85
568.74	34.861
569.08	34.879
569.43	34.895
569.77	34.916
570.12	34.95
570.46	34.99
570.81	35.047
571.15	35.099
571.5	35.166
571.84	35.213
572.19	35.216
572.53	35.209
572.87	35.176
573.22	35.128
573.56	35.106
573.91	35.09
574.25	35.094
574.6	35.103
574.94	35.111
575.29	35.114
575.63	35.119
575.97	35.137
576.32	35.149
576.66	35.175
577.01	35.228
577.35	35.275
577.7	35.316
578.04	35.334
578.38	35.351
578.73	35.375
579.07	35.403
579.41	35.446
579.76	35.491
580.1	35.539
580.45	35.588
580.79	35.638
581.13	35.667
581.48	35.691
581.82	35.725
582.16	35.756
582.51	35.77
582.85	35.793
583.19	35.804
583.54	35.816
583.88	35.821
584.22	35.835
584.57	35.844
584.91	35.854
585.25	35.873
585.6	35.873
585.94	35.87
586.28	35.895
586.63	35.903
586.97	35.923
587.31	35.927
587.65	35.948
588	35.956
588.34	35.944
588.68	35.958
589.03	35.966
589.37	35.969
589.71	35.975
590.05	35.964
590.4	35.955
590.74	35.939
591.08	35.927
591.42	35.918
591.77	35.915
592.11	35.925
592.45	35.917
592.79	35.906
593.13	35.915
593.48	35.93
593.82	35.944
594.16	35.954
594.5	35.975
594.85	35.985
595.19	36.004
595.53	36.003
595.87	36.011
596.21	36.017
596.55	36.034
596.9	36.042
597.24	36.03
597.58	36.01
597.92	35.977
598.26	35.921
598.6	35.892
598.95	35.869
599.29	35.876
599.63	35.886
599.97	35.899
600.31	35.916
600.65	35.934
600.99	35.95
601.34	35.989
601.68	36.031
602.02	36.103
602.36	36.166
602.7	36.216
603.04	36.24
603.38	36.249
603.72	36.241
604.06	36.213
604.4	36.171
604.74	36.148
605.09	36.099
605.43	36.041
605.77	35.981
606.11	35.935
606.45	35.897
606.79	35.892
607.13	35.883
607.47	35.894
607.81	35.914
608.15	35.947
608.49	35.969
608.83	36.002
609.17	36.064
609.51	36.122
609.85	36.177
610.19	36.205
610.53	36.19
610.87	36.169
611.21	36.147
611.55	36.13
611.89	36.121
612.23	36.119
612.57	36.122
612.91	36.115
613.25	36.129
613.59	36.142
613.93	36.172
614.27	36.204
614.61	36.24
614.95	36.257
615.29	36.269
615.63	36.274
615.97	36.284
616.31	36.286
616.64	36.29
616.98	36.268
617.32	36.262
617.66	36.278
618	36.271
618.34	36.268
618.68	36.269
619.02	36.255
619.36	36.225
619.7	36.196
620.03	36.175
620.37	36.164
620.71	36.158
621.05	36.155
621.39	36.128
621.73	36.124
622.07	36.126
622.41	36.116
622.74	36.137
623.08	36.151
623.42	36.15
623.76	36.162
624.1	36.172
624.44	36.186
624.77	36.183
625.11	36.195
625.45	36.211
625.79	36.214
626.13	36.225
626.46	36.228
626.8	36.232
627.14	36.25
627.48	36.23
627.82	36.209
628.15	36.197
628.49	36.191
628.83	36.179
629.17	36.185
629.5	36.183
629.84	36.193
630.18	36.181
630.52	36.179
630.85	36.177
631.19	36.192
631.53	36.205
631.87	36.211
632.2	36.224
632.54	36.227
632.88	36.22
633.22	36.217
633.55	36.21
633.89	36.213
634.23	36.208
634.56	36.181
634.9	36.169
635.24	36.155
635.57	36.147
635.91	36.125
636.25	36.119
636.58	36.099
636.92	36.114
637.26	36.093
637.59	36.079
637.93	36.071
638.27	36.086
638.6	36.09
638.94	36.1
639.28	36.102
639.61	36.106
639.95	36.108
640.28	36.118
640.62	36.102
640.96	36.116
641.29	36.126
641.63	36.134
641.96	36.132
642.3	36.118
642.64	36.099
642.97	36.1
643.31	36.089
643.64	36.071
643.98	36.05
644.32	36.009
644.65	35.972
644.99	35.926
645.32	35.905
645.66	35.862
645.99	35.826
646.33	35.79
646.66	35.744
647	35.711
647.33	35.687
647.67	35.669
648	35.65
648.34	35.643
648.68	35.628
649.01	35.595
649.35	35.573
649.68	35.561
650.01	35.55
650.35	35.524
650.68	35.519
651.02	35.517
651.35	35.499
651.69	35.49
652.02	35.448
652.36	35.447
652.69	35.43
653.03	35.431
653.36	35.414
653.7	35.405
654.03	35.397
654.36	35.362
654.7	35.33
655.03	35.289
655.37	35.263
655.7	35.248
656.04	35.2
656.37	35.18
656.7	35.133
657.04	35.102
657.37	35.064
657.71	35.025
658.04	35.01
658.37	34.976
658.71	34.942
659.04	34.91
659.37	34.904
659.71	34.908
660.04	34.89
660.37	34.866
660.71	34.831
661.04	34.835
661.37	34.835
661.71	34.837
662.04	34.822
662.37	34.816
662.71	34.804
663.04	34.775
663.37	34.723
663.71	34.683
664.04	34.646
664.37	34.602
664.71	34.513
665.04	34.421
665.37	34.294
665.7	34.193
666.04	34.094
666.37	33.984
666.7	33.886
667.03	33.802
667.37	33.696
667.7	33.613
668.03	33.549
668.36	33.487
668.7	33.427
669.03	33.375
669.36	33.32
669.69	33.259
670.03	33.2
670.36	33.148
670.69	33.095
671.02	33.035
671.35	32.956
671.69	32.905
672.02	32.809
672.35	32.732
672.68	32.665
673.01	32.583
673.35	32.509
673.68	32.47
674.01	32.382
674.34	32.301
674.67	32.231
675	32.181
675.33	32.095
675.67	32.049
676	31.965
676.33	31.912
676.66	31.868
676.99	31.799
677.32	31.7
677.65	31.628
677.98	31.549
678.31	31.459
678.65	31.404
678.98	31.314
679.31	31.244
679.64	31.199
679.97	31.105
680.3	31.032
680.63	30.973
680.96	30.927
681.29	30.876
681.62	30.843
681.95	30.828
682.28	30.768
682.61	30.758
682.94	30.717
683.27	30.663
683.6	30.626
683.93	30.573
684.27	30.52
684.6	30.451
684.93	30.371
685.26	30.291
685.59	30.176
685.92	30.091
686.25	29.968
686.57	29.872
686.9	29.786
687.23	29.67
687.56	29.553
687.89	29.461
688.22	29.365
688.55	29.291
688.88	29.182
689.21	29.094
689.54	28.997
689.87	28.9
690.2	28.805
690.53	28.703
690.86	28.633
691.19	28.519
691.52	28.426
691.85	28.321
692.17	28.205
692.5	28.114
692.83	28.031
693.16	27.94
693.49	27.829
693.82	27.699
694.15	27.571
694.48	27.432
694.81	27.366
695.13	27.236
695.46	27.104
695.79	26.979
696.12	26.844
696.45	26.695
696.78	26.532
697.1	26.368
697.43	26.239
697.76	26.113
698.09	26.01
698.42	25.865
698.75	25.739
699.07	25.629
699.4	25.544
699.73	25.465
700.06	25.425
700.38	25.383
700.71	25.386
701.04	25.343
701.37	25.318
701.7	25.248
702.02	25.165
702.35	25.06
702.68	24.951
703.01	24.781
703.33	24.586
703.66	24.339
703.99	24.06
704.32	23.722
704.64	23.387
704.97	23.006
705.3	22.648
705.62	22.334
705.95	22.058
706.28	21.763
706.6	21.53
706.93	21.327
707.26	21.127
707.58	20.942
707.91	20.783
708.24	20.591
708.56	20.438
708.89	20.296
709.22	20.12
709.54	19.91
709.87	19.755
710.2	19.591
710.52	19.395
710.85	19.215
711.18	19.02
711.5	18.839
711.83	18.634
712.15	18.419
712.48	18.186
712.81	18.002
713.13	17.813
713.46	17.585
713.78	17.399
714.11	17.214
714.44	17.051
714.76	16.893
715.09	16.7
715.41	16.576
715.74	16.433
716.06	16.307
716.39	16.129
716.71	16.009
717.04	15.919
717.37	15.812
717.69	15.725
718.02	15.604
718.34	15.466
718.67	15.325
718.99	15.147
719.32	14.95
719.64	14.746
719.97	14.528
720.29	14.262
720.62	13.975
720.94	13.624
721.27	13.253
721.59	12.897
721.91	12.521
722.24	12.181
722.56	11.859
722.89	11.582
723.21	11.289
723.54	11.027
723.86	10.814
724.19	10.476
724.51	10.228
724.83	10.018
725.16	9.747
725.48	9.522
725.81	9.368
726.13	9.154
726.45	8.932
726.78	8.699
727.1	8.499
727.43	8.337
727.75	8.281
728.07	8.189
728.4	8.031
728.72	7.931
729.04	7.832
729.37	7.7
729.69	7.629
730.01	7.548
730.34	7.534
730.66	7.488
730.98	7.37
731.31	7.245
731.63	7.166
731.95	7.132
732.28	7.054
732.6	6.967
732.92	6.822
733.25	6.768
733.57	6.642
733.89	6.534
734.21	6.393
734.54	6.296
734.86	6.24
735.18	6.153
735.5	5.993
735.83	5.894
736.15	5.735
736.47	5.605
736.79	5.419
737.12	5.233
737.44	4.993
737.76	4.794
738.08	4.512
738.4	4.235
738.73	3.883
739.05	3.587
739.37	3.318
739.69	3.124
740.01	2.94
740.34	2.705
740.66	2.524
740.98	2.391
741.3	2.191
741.62	2.13
741.94	1.978
742.27	1.854
742.59	1.706
742.91	1.478
743.23	1.27
743.55	1.04
743.87	0.919
744.19	0.74
744.51	0.549
744.84	0.396
745.16	0.188
745.48	0.005
745.8	-0.183
746.12	-0.387
746.44	-0.565
746.76	-0.764
747.08	-0.952
747.4	-1.265
747.72	-1.463
748.04	-1.689
748.36	-1.862
748.68	-2.089
749	-2.282
749.33	-2.433
749.65	-2.537
749.97	-2.672
750.29	-2.712
750.61	-2.751
750.93	-2.865
751.25	-2.931
751.57	-3.046
751.89	-3.158
752.21	-3.243
752.53	-3.33
752.85	-3.429
753.17	-3.557
753.49	-3.597
753.8	-3.68
754.12	-3.818
754.44	-3.875
754.76	-3.944
755.08	-4.018
755.4	-4.066
755.72	-4.11
756.04	-4.223
756.36	-4.273
756.68	-4.287
757	-4.426
757.32	-4.621
757.64	-4.745
757.96	-4.912
758.27	-5.104
758.59	-5.276
758.91	-5.522
759.23	-5.69
759.55	-5.785
759.87	-5.98
760.19	-6.183
760.51	-6.249
760.82	-6.321
761.14	-6.351
761.46	-6.314
761.78	-6.355
762.1	-6.291
762.42	-6.206
762.73	-6.148
763.05	-6.076
763.37	-5.972
763.69	-5.868
764.01	-5.732
764.32	-5.436
764.64	-5.037
764.96	-4.492
765.28	-3.749
765.6	-3.097
765.91	-2.483
766.23	-2.019
766.55	-1.653
766.87	-1.404
767.18	-1.175
767.5	-1.06
767.82	-1.061
768.14	-1.177
768.45	-1.457
768.77	-1.856
769.09	-2.347
769.4	-2.978
769.72	-3.599
770.04	-4.25
770.36	-4.752
770.67	-5.324
770.99	-5.869
771.31	-6.378
771.62	-6.775
771.94	-7.104
772.26	-7.602
772.57	-8.054
772.89	-8.395
773.21	-8.755
773.52	-8.974
773.84	-9.296
774.15	-9.582
774.47	-9.794
774.79	-9.979
775.1	-10.254
775.42	-10.538
775.74	-10.596
776.05	-10.769
776.37	-10.969
776.68	-11.163
777	-11.452
777.31	-11.689
777.63	-11.867
777.95	-11.96
778.26	-12.144
778.58	-12.327
778.89	-12.409
779.21	-12.514
779.52	-12.532
779.84	-12.565
780.15	-12.545
780.47	-12.516
780.79	-12.535
781.1	-12.56
781.42	-12.677
781.73	-12.71
782.05	-12.832
782.36	-12.888
782.68	-13.051
782.99	-13.159
783.3	-13.342
783.62	-13.546
783.93	-13.686
784.25	-13.807
784.56	-13.89
784.88	-14.008
785.19	-14.14
785.51	-14.152
785.82	-14.437
786.14	-14.629
786.45	-14.863
786.76	-14.948
787.08	-15.045
787.39	-15.219
787.71	-15.361
788.02	-15.546
788.33	-15.61
788.65	-15.57
788.96	-15.656
789.28	-15.549
789.59	-15.398
789.9	-15.174
790.22	-14.971
790.53	-14.638
790.84	-14.31
791.16	-13.996
791.47	-13.741
791.78	-13.547
792.1	-13.497
792.41	-13.37
792.72	-13.305
793.04	-13.322
793.35	-13.45
793.66	-13.679
793.98	-14.025
794.29	-14.354
794.6	-14.603
794.91	-14.828
795.23	-15.153
795.54	-15.452
795.85	-15.863
796.17	-16.116
796.48	-16.334
796.79	-16.405
797.1	-16.335
797.42	-16.201
797.73	-16.078
798.04	-16.064
798.35	-15.96
798.66	-15.917
798.98	-15.749
799.29	-15.541
799.6	-15.546
799.91	-15.526
800.22	-15.542
800.54	-15.672
800.85	-15.872
801.16	-15.972
801.47	-16.177
801.78	-16.472
802.09	-16.621
802.41	-16.866
802.72	-17.046
803.03	-17.12
803.34	-17.315
803.65	-17.529
803.96	-17.657
804.27	-17.948
804.59	-18.15
804.9	-18.258
805.21	-18.427
805.52	-18.7
805.83	-18.868
806.14	-19.046
806.45	-19.22
806.76	-19.221
807.07	-19.355
807.38	-19.483
807.69	-19.416
808	-19.593
808.31	-19.702
808.63	-19.665
808.94	-19.617
809.25	-19.651
809.56	-19.778
809.87	-19.949
810.18	-20.132
810.49	-20.26
810.8	-20.356
811.11	-20.483
811.42	-20.737
811.73	-20.985
812.04	-21.216
812.35	-21.454
812.66	-21.79
812.97	-21.957
813.28	-22.064
813.58	-22.376
813.89	-22.502
814.2	-22.686
814.51	-22.885
814.82	-23.01
815.13	-23.123
815.44	-23.307
815.75	-23.497
816.06	-23.558
816.37	-23.615
816.68	-23.798
816.99	-23.858
817.3	-24.066
817.6	-24.145
817.91	-24.22
818.22	-24.012
818.53	-23.986
818.84	-23.872
819.15	-23.696
819.46	-23.442
819.76	-23.276
820.07	-22.832
820.38	-22.455
820.69	-21.739
821	-21.078
821.31	-20.196
821.61	-19.325
821.92	-18.094
822.23	-16.683
822.54	-15.208
822.85	-13.547
823.15	-11.545
823.46	-9.067
823.77	-6.151
824.08	-3.646
824.38	-1.607
824.69	-0.192
825	0.822
825.31	1.507
825.61	1.905
825.92	2.188
826.23	2.316
826.54	2.372
826.84	2.324
827.15	2.175
827.46	1.894
827.76	1.397
828.07	0.717
828.38	-0.109
828.69	-0.8
828.99	-1.221
829.3	-1.443
829.61	-1.496
829.91	-1.572
830.22	-1.707
830.52	-1.867
830.83	-2.058
831.14	-2.351
831.44	-2.69
831.75	-3.175
832.06	-4.019
832.36	-5.201
832.67	-6.74
832.97	-8.661
833.28	-10.638
833.59	-12.454
833.89	-14.109
834.2	-15.445
834.5	-16.317
834.81	-16.678
835.12	-16.023
835.42	-14.576
835.73	-12.819
836.03	-11.266
836.34	-10.039
836.64	-9.038
836.95	-8.429
837.25	-7.977
837.56	-7.69
837.86	-7.614
838.17	-7.73
838.47	-8.235
838.78	-9.183
839.08	-10.609
839.39	-12.41
839.69	-14.457
840	-16.679
840.3	-18.871
840.61	-21.117
840.91	-23.426
841.22	-25.423
841.52	-26.872
841.83	-27.729
842.13	-27.917
842.43	-27.937
842.74	-27.777
843.04	-27.764
843.35	-27.93
843.65	-27.991
843.96	-28.29
844.26	-28.623
844.56	-29.189
844.87	-30.266
845.17	-31.848
845.47	-34.077
845.78	-36.471
846.08	-39.28
846.39	-41.693
846.69	-43.982
846.99	-46.299
847.3	-48.173
847.6	-50.099
847.9	-51.769
848.21	-53.627
848.51	-54.849
848.81	-56.143
849.11	-57.392
849.42	-58.133
849.72	-58.845
850.02	-59.613
850.33	-60.209
850.63	-60.547
850.93	-61.255
851.23	-61.887
851.54	-61.877
851.84	-62.732
852.14	-63.117
852.44	-63.27
852.75	-63.622
853.05	-64.097
853.35	-64.488
853.65	-64.844
853.96	-65.363
854.26	-65.162
854.56	-65.349
854.86	-66.015
855.16	-66.442
855.47	-66.724
855.77	-67.399
856.07	-67.746
856.37	-67.997
856.67	-68.2
856.97	-68.141
857.28	-68.732
857.58	-69.584
857.88	-70.381
858.18	-70.889
858.48	-70.836
858.78	-71.168
859.08	-71.225
859.38	-71.456
859.69	-71.448
859.99	-71.286
860.29	-71.381
860.59	-71.399
860.89	-71.155
861.19	-70.819
861.49	-70.768
861.79	-71.226
862.09	-71.41
862.39	-71.596
862.69	-71.827
862.99	-72.284
863.29	-72.919
863.59	-73.442
863.89	-73.833
864.19	-73.972
864.49	-74.02
864.79	-73.882
865.09	-73.724
865.39	-73.431
865.69	-73.502
865.99	-73.461
866.29	-72.955
866.59	-72.49
866.89	-72.013
867.19	-71.589
867.49	-71.357
867.79	-71.755
868.09	-71.533
868.39	-71.481
[truncated: 48 more rows]

## Sheet: Cestru03
179.25	-2471.43
179.63	-2471.43
180.01	-2471.43
180.38	-7898.58
180.76	-2061.06
181.14	-3424.24
181.51	-3608.12
181.89	-3690.14
182.27	-3941.58
182.65	-4007.59
183.02	-3738
183.4	-3477.91
183.78	-3629.39
184.15	-3319.53
184.53	-3452.56
184.91	-3142.75
185.28	-2755.07
185.66	-2540.93
186.04	-2338.77
186.41	-1728.92
186.79	-1285.56
187.17	-1087.74
187.54	-968.023
187.92	-831.169
188.3	-752.658
188.67	-677.649
189.05	-605.842
189.43	-545.345
189.8	-503.474
190.18	-481.483
190.56	-478.785
190.93	-484.376
191.31	-488.371
191.69	-483.716
192.06	-484.832
192.44	-481.257
192.82	-471.766
193.19	-474.542
193.57	-480.283
193.95	-487.119
194.32	-472.051
194.7	-471.04
195.07	-475.1
195.45	-478.574
195.83	-475.91
196.2	-474.196
196.58	-489.315
196.96	-492.785
197.33	-488.019
197.71	-488.119
198.08	-479.808
198.46	-476.057
198.84	-481.753
199.21	-469.57
199.59	-470.792
199.96	-467.703
200.34	-473.568
200.72	-452.185
201.09	-452.646
201.47	-453.341
201.84	-439.732
202.22	-441.365
202.6	-450.753
202.97	-433.827
203.35	-436.703
203.72	-425.691
204.1	-422.301
204.48	-416.152
204.85	-412.721
205.23	-406.076
205.6	-401.364
205.98	-403.636
206.35	-396.218
206.73	-389.194
207.11	-393.74
207.48	-389.461
207.86	-393.829
208.23	-401.117
208.61	-402.14
208.98	-403.293
209.36	-406.368
209.73	-406.312
210.11	-413.959
210.49	-414.371
210.86	-411.282
211.24	-408.898
211.61	-405.218
211.99	-407.785
212.36	-402.582
212.74	-396.991
213.11	-397.788
213.49	-397.911
213.86	-400.587
214.24	-391.119
214.61	-391.551
214.99	-394.581
215.36	-396.545
215.74	-400.51
216.12	-391.875
216.49	-386.855
216.87	-388.476
217.24	-385.62
217.62	-381.78
217.99	-378.347
218.37	-378.003
218.74	-376.106
219.12	-374.575
219.49	-372.785
219.87	-364.344
220.24	-365.177
220.62	-364.826
220.99	-362.255
221.37	-362.456
221.74	-358.768
222.11	-349.298
222.49	-342.844
222.86	-333.03
223.24	-320.659
223.61	-312.229
223.99	-308.562
224.36	-298.645
224.74	-287.571
225.11	-278.946
225.49	-269.385
225.86	-258.635
226.24	-253.226
226.61	-242.067
226.99	-232.03
227.36	-221.569
227.73	-206.168
228.11	-190.778
228.48	-171.312
228.86	-149.669
229.23	-126.035
229.61	-105.18
229.98	-89.085
230.36	-76.251
230.73	-67.876
231.1	-62.045
231.48	-57.878
231.85	-54.371
232.23	-51.449
232.6	-49.583
232.97	-48.804
233.35	-48.973
233.72	-50.395
234.1	-51.957
234.47	-53.113
234.85	-53.175
235.22	-52.08
235.59	-50.419
235.97	-48.731
236.34	-47.024
236.72	-45.391
237.09	-43.74
237.46	-41.82
237.84	-39.85
238.21	-38.101
238.58	-37.045
238.96	-36.131
239.33	-35.286
239.71	-34.399
240.08	-33.236
240.45	-31.75
240.83	-29.653
241.2	-27.081
241.57	-24.564
241.95	-21.556
242.32	-18.539
242.7	-15.539
243.07	-12.839
243.44	-10.542
243.82	-8.774
244.19	-7.549
244.56	-6.735
244.94	-6.293
245.31	-6.047
245.68	-5.889
246.06	-5.816
246.43	-5.707
246.8	-5.419
247.18	-4.938
247.55	-4.29
247.92	-3.499
248.3	-2.688
248.67	-2.017
249.04	-1.479
249.42	-1.104
249.79	-0.849
250.16	-0.687
250.54	-0.639
250.91	-0.719
251.28	-0.932
251.65	-1.292
252.03	-1.81
252.4	-2.414
252.77	-3.017
253.15	-3.542
253.52	-3.875
253.89	-4.12
254.27	-4.35
254.64	-4.538
255.01	-4.662
255.38	-4.771
255.76	-4.873
256.13	-5.052
256.5	-5.384
256.87	-5.845
257.25	-6.387
257.62	-6.944
257.99	-7.25
258.37	-7.251
258.74	-6.939
259.11	-6.361
259.48	-5.505
259.86	-4.473
260.23	-3.265
260.6	-2.172
260.97	-1.277
261.35	-0.64
261.72	-0.194
262.09	0.052
262.46	0.19
262.84	0.27
263.21	0.29
263.58	0.253
263.95	0.134
264.32	-0.1
264.7	-0.474
265.07	-1.002
265.44	-1.635
265.81	-2.353
266.19	-2.918
266.56	-3.284
266.93	-3.416
267.3	-3.383
267.67	-3.286
268.05	-3.092
268.42	-2.929
268.79	-2.692
269.16	-2.487
269.53	-2.309
269.9	-2.147
270.28	-2.041
270.65	-1.931
271.02	-1.863
271.39	-1.807
271.76	-1.735
272.14	-1.65
272.51	-1.517
272.88	-1.387
273.25	-1.223
273.62	-1.069
273.99	-0.926
274.37	-0.809
274.74	-0.725
275.11	-0.7
275.48	-0.721
275.85	-0.769
276.22	-0.876
276.59	-0.981
276.97	-1.121
277.34	-1.286
277.71	-1.441
278.08	-1.596
278.45	-1.731
278.82	-1.854
279.19	-1.952
279.57	-2.009
279.94	-2.044
280.31	-2.052
280.68	-2.109
281.05	-2.113
281.42	-2.1
281.79	-2.053
282.16	-1.986
282.53	-1.852
282.91	-1.718
283.28	-1.566
283.65	-1.405
284.02	-1.294
284.39	-1.201
284.76	-1.085
285.13	-1.008
285.5	-0.899
285.87	-0.768
286.24	-0.661
286.61	-0.545
286.99	-0.423
287.36	-0.301
287.73	-0.244
288.1	-0.205
288.47	-0.166
288.84	-0.163
289.21	-0.164
289.58	-0.2
289.95	-0.273
290.32	-0.322
290.69	-0.41
291.06	-0.506
291.43	-0.583
291.8	-0.612
292.17	-0.623
292.54	-0.659
292.91	-0.697
293.28	-0.744
293.65	-0.797
294.02	-0.857
294.4	-0.927
294.77	-1.02
295.14	-1.078
295.51	-1.161
295.88	-1.237
296.25	-1.264
296.62	-1.238
296.99	-1.132
297.36	-0.995
297.73	-0.791
298.1	-0.568
298.47	-0.375
298.84	-0.196
299.21	-0.091
299.58	-0.028
299.95	-0.025
300.32	-0.045
300.69	-0.086
301.06	-0.169
301.42	-0.26
301.79	-0.399
302.16	-0.618
302.53	-0.848
302.9	-1.094
303.27	-1.302
303.64	-1.476
304.01	-1.564
304.38	-1.627
304.75	-1.667
305.12	-1.675
305.49	-1.691
305.86	-1.735
306.23	-1.755
306.6	-1.773
306.97	-1.816
307.34	-1.905
307.71	-1.948
308.08	-2.002
308.45	-2.057
308.81	-2.107
309.18	-2.144
309.55	-2.159
309.92	-2.108
310.29	-2.023
310.66	-1.931
311.03	-1.811
311.4	-1.684
311.77	-1.571
312.14	-1.442
312.51	-1.342
312.87	-1.281
313.24	-1.251
313.61	-1.275
313.98	-1.38
314.35	-1.546
314.72	-1.724
315.09	-1.93
315.46	-2.156
315.83	-2.385
316.19	-2.659
316.56	-2.964
316.93	-3.257
317.3	-3.564
317.67	-3.825
318.04	-3.973
318.41	-4.072
318.77	-4.166
319.14	-4.242
319.51	-4.298
319.88	-4.405
320.25	-4.534
320.62	-4.635
320.99	-4.741
321.35	-4.828
321.72	-4.932
322.09	-5.081
322.46	-5.215
322.83	-5.345
323.19	-5.467
323.56	-5.573
323.93	-5.643
324.3	-5.645
324.67	-5.601
325.04	-5.504
325.4	-5.41
325.77	-5.303
326.14	-5.206
326.51	-5.112
326.88	-5.044
327.24	-4.949
327.61	-4.854
327.98	-4.825
328.35	-4.813
328.71	-4.834
329.08	-4.91
329.45	-5.001
329.82	-5.075
330.19	-5.146
330.55	-5.23
330.92	-5.311
331.29	-5.429
331.66	-5.551
332.02	-5.633
332.39	-5.726
332.76	-5.814
333.13	-5.858
333.49	-5.861
333.86	-5.865
334.23	-5.844
334.6	-5.792
334.96	-5.77
335.33	-5.74
335.7	-5.71
336.07	-5.688
336.43	-5.635
336.8	-5.578
337.17	-5.539
337.53	-5.505
337.9	-5.466
338.27	-5.455
338.64	-5.454
339	-5.436
339.37	-5.442
339.74	-5.441
340.1	-5.418
340.47	-5.444
340.84	-5.475
341.2	-5.492
341.57	-5.523
341.94	-5.55
342.3	-5.552
342.67	-5.531
343.04	-5.523
343.4	-5.526
343.77	-5.554
344.14	-5.559
344.5	-5.55
344.87	-5.526
345.24	-5.488
345.6	-5.437
345.97	-5.411
346.34	-5.372
346.7	-5.355
347.07	-5.331
347.44	-5.285
347.8	-5.263
348.17	-5.272
348.54	-5.298
348.9	-5.331
349.27	-5.398
349.63	-5.465
350	-5.518
350.37	-5.577
350.73	-5.643
351.1	-5.696
351.46	-5.736
351.83	-5.755
352.2	-5.781
352.56	-5.774
352.93	-5.813
353.29	-5.814
353.66	-5.824
354.03	-5.835
354.39	-5.833
354.76	-5.845
355.12	-5.835
355.49	-5.844
355.86	-5.837
356.22	-5.801
356.59	-5.759
356.95	-5.668
357.32	-5.603
357.68	-5.54
358.05	-5.457
358.41	-5.385
358.78	-5.292
359.15	-5.217
359.51	-5.152
359.88	-5.111
360.24	-5.091
360.61	-5.068
360.97	-5.017
361.34	-4.966
361.7	-4.896
362.07	-4.813
362.43	-4.703
362.8	-4.593
363.16	-4.516
363.53	-4.466
363.89	-4.412
364.26	-4.366
364.62	-4.334
364.99	-4.353
365.35	-4.385
365.72	-4.431
366.08	-4.482
366.45	-4.573
366.81	-4.703
367.18	-4.815
367.54	-4.873
367.91	-4.921
368.27	-4.942
368.64	-4.985
369	-5.003
369.37	-5
369.73	-4.987
370.1	-5.015
370.46	-5.035
370.83	-5.011
371.19	-4.991
371.55	-4.987
371.92	-4.945
372.28	-4.906
372.65	-4.819
373.01	-4.744
373.38	-4.687
373.74	-4.643
374.11	-4.568
374.47	-4.51
374.83	-4.46
375.2	-4.408
375.56	-4.378
375.93	-4.34
376.29	-4.292
376.65	-4.248
377.02	-4.184
377.38	-4.093
377.75	-3.982
378.11	-3.844
378.47	-3.71
378.84	-3.586
379.2	-3.46
379.57	-3.326
379.93	-3.241
380.29	-3.169
380.66	-3.103
381.02	-3.034
381.38	-2.964
381.75	-2.902
382.11	-2.866
382.48	-2.836
382.84	-2.79
383.2	-2.75
383.57	-2.685
383.93	-2.599
384.29	-2.478
384.66	-2.363
385.02	-2.252
385.38	-2.117
385.75	-1.993
386.11	-1.856
386.47	-1.705
386.84	-1.563
387.2	-1.413
387.56	-1.271
387.93	-1.124
388.29	-0.994
388.65	-0.863
389.02	-0.719
389.38	-0.601
389.74	-0.469
390.1	-0.345
390.47	-0.211
390.83	-0.06
391.19	0.085
391.56	0.256
391.92	0.433
392.28	0.646
392.64	0.876
393.01	1.075
393.37	1.288
393.73	1.483
394.09	1.695
394.46	1.906
394.82	2.11
395.18	2.34
395.55	2.568
395.91	2.786
396.27	2.979
396.63	3.171
396.99	3.373
397.36	3.585
397.72	3.809
398.08	4.016
398.44	4.24
398.81	4.473
399.17	4.711
399.53	4.951
399.89	5.223
400.25	5.497
400.62	5.781
400.98	6.081
401.34	6.356
401.7	6.635
402.06	6.944
402.43	7.257
402.79	7.578
403.15	7.886
403.51	8.205
403.87	8.54
404.24	8.902
404.6	9.286
404.96	9.666
405.32	10.069
405.68	10.476
406.04	10.866
406.41	11.232
406.77	11.612
407.13	11.994
407.49	12.369
407.85	12.731
408.21	13.09
408.57	13.445
408.94	13.804
409.3	14.172
409.66	14.544
410.02	14.923
410.38	15.34
410.74	15.777
411.1	16.204
411.46	16.629
411.83	17.05
412.19	17.462
412.55	17.868
412.91	18.275
413.27	18.664
413.63	19.049
413.99	19.444
414.35	19.824
414.71	20.2
415.07	20.623
415.43	21.049
415.8	21.48
416.16	21.924
416.52	22.353
416.88	22.783
417.24	23.214
417.6	23.639
417.96	24.062
418.32	24.483
418.68	24.904
419.04	25.316
419.4	25.727
419.76	26.122
420.12	26.497
420.48	26.865
420.84	27.227
421.2	27.592
421.56	27.929
421.92	28.263
422.28	28.576
422.64	28.875
423	29.167
423.36	29.465
423.72	29.746
424.08	30.026
424.44	30.3
424.8	30.557
425.16	30.812
425.52	31.088
425.88	31.374
426.24	31.654
426.6	31.928
426.96	32.187
427.32	32.413
427.68	32.644
428.04	32.86
428.4	33.082
428.76	33.345
429.12	33.602
429.48	33.863
429.84	34.118
430.2	34.375
430.56	34.618
430.92	34.836
431.28	35.061
431.64	35.263
432	35.481
432.35	35.691
432.71	35.888
433.07	36.106
433.43	36.312
433.79	36.515
434.15	36.721
434.51	36.918
434.87	37.115
435.23	37.316
435.59	37.515
435.95	37.703
436.3	37.897
436.66	38.084
437.02	38.262
437.38	38.436
437.74	38.623
438.1	38.823
438.46	39.015
438.82	39.199
439.17	39.383
439.53	39.521
439.89	39.649
440.25	39.757
440.61	39.86
440.97	39.983
441.33	40.094
441.68	40.193
442.04	40.294
442.4	40.401
442.76	40.507
443.12	40.605
443.48	40.725
443.83	40.847
444.19	40.969
444.55	41.081
444.91	41.187
445.27	41.292
445.62	41.399
445.98	41.47
446.34	41.537
446.7	41.571
447.06	41.6
447.41	41.616
447.77	41.639
448.13	41.672
448.49	41.735
448.84	41.801
449.2	41.88
449.56	41.955
449.92	42.06
450.28	42.159
450.63	42.276
450.99	42.401
451.35	42.532
451.71	42.667
452.06	42.787
452.42	42.87
452.78	42.942
453.14	42.993
453.49	43.046
453.85	43.088
454.21	43.139
454.56	43.183
454.92	43.212
455.28	43.246
455.64	43.265
455.99	43.299
456.35	43.354
456.71	43.41
457.06	43.467
457.42	43.534
457.78	43.595
458.13	43.636
458.49	43.682
458.85	43.708
459.2	43.733
459.56	43.757
459.92	43.753
460.27	43.727
460.63	43.701
460.99	43.688
461.34	43.698
461.7	43.721
462.06	43.77
462.41	43.815
462.77	43.877
463.13	43.926
463.48	43.977
463.84	44.05
464.2	44.145
464.55	44.26
464.91	44.383
465.26	44.501
465.62	44.576
465.98	44.622
466.33	44.663
466.69	44.701
467.04	44.75
467.4	44.784
467.76	44.802
468.11	44.805
468.47	44.814
468.82	44.844
469.18	44.886
469.53	44.958
469.89	45.024
470.25	45.08
470.6	45.114
470.96	45.163
471.31	45.209
471.67	45.272
472.02	45.36
472.38	45.428
472.74	45.486
473.09	45.509
473.45	45.534
473.8	45.553
474.16	45.578
474.51	45.634
474.87	45.684
475.22	45.74
475.58	45.793
475.93	45.837
476.29	45.874
476.64	45.899
477	45.923
477.35	45.923
477.71	45.942
478.06	45.952
478.42	45.938
478.77	45.908
479.13	45.896
479.48	45.888
479.84	45.882
480.19	45.891
480.55	45.9
480.9	45.921
481.25	45.946
481.61	45.952
481.96	45.958
482.32	45.975
482.67	45.98
483.03	45.99
483.38	45.995
483.74	46.018
484.09	46.131
484.44	47.159
484.8	49.65
485.15	52.373
485.51	53.85
485.86	54.097
486.22	53.919
486.57	53.764
486.92	53.67
487.28	53.606
487.63	53.562
487.99	53.589
488.34	53.331
488.69	52.128
489.05	50.336
489.4	49.027
489.75	48.509
490.11	48.418
490.46	48.424
490.82	48.443
491.17	48.474
491.52	48.505
491.88	48.472
492.23	48.273
492.58	48.027
492.94	47.865
493.29	47.705
493.64	47.655
494	47.655
494.35	47.676
494.7	47.704
495.06	47.736
495.41	47.778
495.76	47.838
496.12	47.86
496.47	47.679
496.82	47.354
497.17	47.199
497.53	47.137
497.88	47.107
498.23	47.078
498.59	47.058
498.94	47.054
499.29	47.053
499.64	47.044
500	47.048
500.35	47.062
500.7	47.079
501.05	47.093
501.41	47.146
501.76	47.196
502.11	47.246
502.46	47.295
502.82	47.325
503.17	47.359
503.52	47.394
503.87	47.432
504.23	47.439
504.58	47.444
504.93	47.452
505.28	47.438
505.63	47.446
505.99	47.445
506.34	47.452
506.69	47.472
507.04	47.485
507.39	47.51
507.75	47.52
508.1	47.547
508.45	47.56
508.8	47.569
509.15	47.579
509.5	47.555
509.86	47.548
510.21	47.534
510.56	47.527
510.91	47.526
511.26	47.521
511.61	47.525
511.97	47.534
512.32	47.546
512.67	47.573
513.02	47.58
513.37	47.605
513.72	47.605
514.07	47.632
514.42	47.651
514.78	47.668
515.13	47.699
515.48	47.73
515.83	47.745
516.18	47.769
516.53	47.788
516.88	47.833
517.23	47.864
517.58	47.908
517.93	47.902
518.28	47.891
518.64	47.872
518.99	47.821
519.34	47.778
519.69	47.753
520.04	47.736
520.39	47.724
520.74	47.714
521.09	47.716
521.44	47.731
521.79	47.759
522.14	47.788
522.49	47.816
522.84	47.857
523.19	47.903
523.54	47.936
523.89	47.965
524.24	47.993
524.59	48.015
524.94	48.03
525.29	48.026
525.64	48.007
525.99	47.969
526.34	47.937
526.69	47.915
527.04	47.898
527.39	47.918
527.74	47.939
528.09	47.962
528.44	47.985
528.79	48.03
529.14	48.408
529.49	49.694
529.84	51.573
530.19	53.017
530.54	53.666
530.89	53.817
531.24	53.801
531.59	53.784
531.93	53.786
532.28	53.815
532.63	53.9
532.98	53.84
533.33	52.981
533.68	51.279
534.03	49.689
534.38	48.947
534.73	48.831
535.08	48.849
535.43	48.86
535.77	48.864
536.12	48.881
536.47	48.902
536.82	48.914
537.17	48.917
537.52	48.911
537.87	48.871
538.22	48.697
538.56	48.487
538.91	48.377
539.26	48.339
539.61	48.319
539.96	48.311
540.31	48.31
540.65	48.319
541	48.356
541.35	48.369
541.7	48.383
542.05	48.494
542.4	48.913
542.74	49.438
543.09	49.705
543.44	49.771
543.79	49.78
544.14	49.771
544.48	49.771
544.83	49.762
545.18	49.774
545.53	49.808
545.87	49.795
546.22	49.529
546.57	49.078
546.92	48.752
547.26	48.622
547.61	48.551
547.96	48.501
548.31	48.459
548.65	48.458
549	48.477
549.35	48.487
549.7	48.519
550.04	48.55
550.39	48.588
550.74	48.645
551.09	48.688
551.43	48.741
551.78	48.813
552.13	48.884
552.47	48.938
552.82	48.956
553.17	48.95
553.51	48.921
553.86	48.891
554.21	48.866
554.55	48.85
554.9	48.835
555.25	48.842
555.59	48.845
555.94	48.844
556.29	48.834
556.63	48.848
556.98	48.883
557.33	48.926
557.67	48.98
558.02	49.02
558.37	49.061
558.71	49.086
559.06	49.089
559.4	49.098
559.75	49.119
560.1	49.143
560.44	49.157
560.79	49.168
561.14	49.175
561.48	49.166
561.83	49.16
562.17	49.13
562.52	49.127
562.86	49.123
563.21	49.134
563.56	49.133
563.9	49.137
564.25	49.15
564.59	49.163
564.94	49.173
565.28	49.189
565.63	49.203
565.97	49.228
566.32	49.244
566.67	49.233
567.01	49.18
567.36	49.138
567.7	49.097
568.05	49.065
568.39	49.057
568.74	49.065
569.08	49.086
569.43	49.113
569.77	49.131
570.12	49.152
570.46	49.197
570.81	49.251
571.15	49.308
571.5	49.357
571.84	49.39
572.19	49.393
572.53	49.355
572.87	49.31
573.22	49.257
573.56	49.226
573.91	49.204
574.25	49.203
574.6	49.214
574.94	49.216
575.29	49.222
575.63	49.221
575.97	49.24
576.32	49.267
576.66	49.292
577.01	49.343
577.35	49.389
577.7	49.427
578.04	49.449
578.38	49.466
578.73	49.486
579.07	49.513
579.41	49.549
579.76	49.578
580.1	49.63
580.45	49.683
580.79	49.727
581.13	49.766
581.48	49.796
581.82	49.822
582.16	49.85
582.51	49.892
582.85	49.915
583.19	49.95
583.54	49.969
583.88	49.974
584.22	49.975
584.57	49.969
584.91	49.952
585.25	49.959
585.6	49.954
585.94	49.948
586.28	49.939
586.63	49.928
586.97	49.923
587.31	49.927
587.65	49.927
588	49.93
588.34	49.923
588.68	49.942
589.03	49.92
589.37	49.902
589.71	49.899
590.05	49.887
590.4	49.872
590.74	49.861
591.08	49.857
591.42	49.854
591.77	49.838
592.11	49.841
592.45	49.831
592.79	49.854
593.13	49.867
593.48	49.876
593.82	49.874
594.16	49.896
594.5	49.899
594.85	49.9
595.19	49.892
595.53	49.884
595.87	49.867
596.21	49.86
596.55	49.844
596.9	49.847
597.24	49.832
597.58	49.805
597.92	49.743
598.26	49.679
598.6	49.618
598.95	49.605
599.29	49.619
599.63	49.637
599.97	49.656
600.31	49.671
600.65	49.684
600.99	49.697
601.34	49.736
601.68	49.797
602.02	49.878
602.36	49.958
602.7	50.002
603.04	50.025
603.38	50.025
603.72	49.994
604.06	49.942
604.4	49.884
604.74	49.856
605.09	49.792
605.43	49.711
605.77	49.636
606.11	49.56
606.45	49.518
606.79	49.509
607.13	49.508
607.47	49.532
607.81	49.572
608.15	49.619
608.49	49.636
608.83	49.671
609.17	49.739
609.51	49.804
609.85	49.864
610.19	49.885
610.53	49.852
610.87	49.811
611.21	49.758
611.55	49.73
611.89	49.707
612.23	49.708
612.57	49.718
612.91	49.721
613.25	49.728
613.59	49.75
613.93	49.79
614.27	49.839
614.61	49.907
614.95	49.958
615.29	49.979
615.63	49.979
615.97	49.976
616.31	49.964
616.64	49.95
616.98	49.926
617.32	49.927
617.66	49.916
618	49.894
618.34	49.866
618.68	49.85
619.02	49.83
619.36	49.814
619.7	49.799
620.03	49.784
620.37	49.772
620.71	49.771
621.05	49.76
621.39	49.753
621.73	49.757
622.07	49.755
622.41	49.762
622.74	49.755
623.08	49.769
623.42	49.757
623.76	49.761
624.1	49.779
624.44	49.789
624.77	49.788
625.11	49.801
625.45	49.807
625.79	49.798
626.13	49.805
626.46	49.819
626.8	49.805
627.14	49.788
627.48	49.759
627.82	49.731
628.15	49.709
628.49	49.683
628.83	49.658
629.17	49.651
629.5	49.665
629.84	49.659
630.18	49.66
630.52	49.658
630.85	49.671
631.19	49.68
631.53	49.69
631.87	49.694
632.2	49.72
632.54	49.722
632.88	49.702
633.22	49.683
633.55	49.664
633.89	49.641
634.23	49.632
634.56	49.619
634.9	49.614
635.24	49.611
635.57	49.6
635.91	49.597
636.25	49.596
636.58	49.611
636.92	49.614
637.26	49.608
637.59	49.599
637.93	49.593
638.27	49.589
638.6	49.599
638.94	49.611
639.28	49.632
639.61	49.625
639.95	49.622
640.28	49.615
640.62	49.622
640.96	49.619
641.29	49.631
641.63	49.642
641.96	49.644
642.3	49.621
642.64	49.593
642.97	49.555
643.31	49.524
643.64	49.517
643.98	49.487
644.32	49.435
644.65	49.429
644.99	49.389
645.32	49.361
645.66	49.342
645.99	49.338
646.33	49.295
646.66	49.285
647	49.246
647.33	49.213
647.67	49.207
648	49.194
648.34	49.168
648.68	49.175
649.01	49.157
649.35	49.129
649.68	49.113
650.01	49.13
650.35	49.11
650.68	49.131
651.02	49.116
651.35	49.103
651.69	49.092
652.02	49.087
652.36	49.073
652.69	49.073
653.03	49.1
653.36	49.083
653.7	49.058
654.03	49.051
654.36	49.025
654.7	49.028
655.03	49.001
655.37	48.985
655.7	48.95
656.04	48.945
656.37	48.911
656.7	48.85
657.04	48.827
657.37	48.805
657.71	48.775
658.04	48.766
658.37	48.741
658.71	48.723
659.04	48.693
659.37	48.676
659.71	48.657
660.04	48.647
660.37	48.608
660.71	48.59
661.04	48.585
661.37	48.596
661.71	48.6
662.04	48.596
662.37	48.608
662.71	48.608
663.04	48.593
663.37	48.559
663.71	48.539
664.04	48.545
664.37	48.511
664.71	48.448
665.04	48.387
665.37	48.294
665.7	48.228
666.04	48.148
666.37	48.092
666.7	48.053
667.03	48.007
667.37	47.93
667.7	47.885
668.03	47.837
668.36	47.823
668.7	47.787
669.03	47.766
669.36	47.711
669.69	47.647
670.03	47.603
670.36	47.562
670.69	47.52
671.02	47.497
671.35	47.427
671.69	47.414
672.02	47.356
672.35	47.299
672.68	47.253
673.01	47.199
673.35	47.149
673.68	47.095
674.01	47.033
674.34	46.95
674.67	46.889
675	46.844
675.33	46.754
675.67	46.686
676	46.624
676.33	46.552
676.66	46.505
676.99	46.475
677.32	46.418
677.65	46.363
677.98	46.324
678.31	46.267
678.65	46.241
678.98	46.188
679.31	46.153
679.64	46.105
679.97	46.07
680.3	46.041
680.63	45.99
680.96	45.958
681.29	45.915
681.62	45.877
681.95	45.874
682.28	45.818
682.61	45.801
682.94	45.741
683.27	45.705
683.6	45.643
683.93	45.595
684.27	45.507
684.6	45.416
684.93	45.315
685.26	45.207
685.59	45.064
685.92	44.963
686.25	44.822
686.57	44.729
686.9	44.595
687.23	44.473
687.56	44.292
687.89	44.182
688.22	44.036
688.55	43.927
688.88	43.799
689.21	43.648
689.54	43.501
689.87	43.362
690.2	43.215
690.53	43.064
690.86	42.939
691.19	42.836
691.52	42.713
691.85	42.626
692.17	42.497
692.5	42.379
692.83	42.277
693.16	42.169
693.49	42.064
693.82	41.951
694.15	41.872
694.48	41.758
694.81	41.653
695.13	41.566
695.46	41.458
695.79	41.346
696.12	41.233
696.45	41.107
696.78	40.98
697.1	40.835
697.43	40.703
697.76	40.545
698.09	40.402
698.42	40.29
698.75	40.137
699.07	40.02
699.4	39.949
699.73	39.91
700.06	39.878
700.38	39.834
700.71	39.818
701.04	39.805
701.37	39.798
701.7	39.75
702.02	39.663
702.35	39.603
702.68	39.505
703.01	39.345
703.33	39.143
703.66	38.924
703.99	38.673
704.32	38.374
704.64	38.044
704.97	37.691
705.3	37.415
705.62	37.145
705.95	36.841
706.28	36.567
706.6	36.356
706.93	36.161
707.26	36.008
707.58	35.832
707.91	35.679
708.24	35.51
708.56	35.374
708.89	35.202
709.22	35.028
709.54	34.903
709.87	34.779
710.2	34.603
710.52	34.423
710.85	34.229
711.18	34.082
711.5	33.924
711.83	33.735
712.15	33.55
712.48	33.349
712.81	33.161
713.13	32.96
713.46	32.755
713.78	32.591
714.11	32.452
714.44	32.309
714.76	32.154
715.09	32.025
715.41	31.921
715.74	31.806
716.06	31.72
716.39	31.632
716.71	31.501
717.04	31.425
717.37	31.381
717.69	31.349
718.02	31.286
718.34	31.206
718.67	31.081
718.99	30.948
719.32	30.768
719.64	30.579
719.97	30.387
720.29	30.21
720.62	29.981
720.94	29.703
721.27	29.375
721.59	29.023
721.91	28.67
722.24	28.366
722.56	28.076
722.89	27.828
723.21	27.543
723.54	27.287
723.86	27.041
724.19	26.753
724.51	26.512
724.83	26.285
725.16	26.049
725.48	25.875
725.81	25.718
726.13	25.524
726.45	25.355
726.78	25.212
727.1	25.035
727.43	24.922
727.75	24.813
728.07	24.696
728.4	24.562
728.72	24.497
729.04	24.395
729.37	24.261
729.69	24.213
730.01	24.126
730.34	24.07
730.66	24.033
730.98	23.937
731.31	23.894
731.63	23.852
731.95	23.793
732.28	23.744
732.6	23.672
732.92	23.567
733.25	23.506
733.57	23.386
733.89	23.292
734.21	23.184
734.54	23.098
734.86	23.046
735.18	22.933
735.5	22.863
735.83	22.749
736.15	22.622
736.47	22.549
736.79	22.389
737.12	22.273
737.44	22.024
737.76	21.84
738.08	21.595
738.4	21.326
738.73	21.056
739.05	20.753
739.37	20.561
739.69	20.351
740.01	20.117
740.34	19.913
740.66	19.702
740.98	19.595
741.3	19.391
741.62	19.287
741.94	19.171
742.27	19.051
742.59	18.913
742.91	18.719
743.23	18.576
743.55	18.362
743.87	18.199
744.19	18.032
744.51	17.853
744.84	17.744
745.16	17.596
745.48	17.442
745.8	17.292
746.12	17.188
746.44	16.981
746.76	16.806
747.08	16.701
747.4	16.522
747.72	16.341
748.04	16.218
748.36	16.05
748.68	15.874
749	15.656
749.33	15.502
749.65	15.346
749.97	15.257
750.29	15.145
750.61	15.119
750.93	15.023
751.25	15.022
751.57	14.906
751.89	14.839
752.21	14.741
752.53	14.607
752.85	14.516
753.17	14.42
753.49	14.334
753.8	14.232
754.12	14.046
754.44	13.934
754.76	13.837
755.08	13.761
755.4	13.651
755.72	13.595
756.04	13.526
756.36	13.425
756.68	13.379
757	13.258
757.32	13.155
757.64	13.03
757.96	12.909
758.27	12.755
758.59	12.631
758.91	12.499
759.23	12.325
759.55	12.23
759.87	12.094
760.19	11.936
760.51	11.88
760.82	11.801
761.14	11.782
761.46	11.764
761.78	11.665
762.1	11.684
762.42	11.735
762.73	11.831
763.05	11.865
763.37	11.932
763.69	12.021
764.01	12.177
764.32	12.426
764.64	12.808
764.96	13.286
765.28	13.899
765.6	14.479
765.91	14.956
766.23	15.372
766.55	15.735
766.87	16.031
767.18	16.239
767.5	16.321
767.82	16.324
768.14	16.234
768.45	16.044
768.77	15.737
769.09	15.356
769.4	14.869
769.72	14.298
770.04	13.725
770.36	13.173
770.67	12.664
770.99	12.181
771.31	11.714
771.62	11.256
771.94	10.82
772.26	10.462
772.57	10.024
772.89	9.684
773.21	9.371
773.52	9.095
773.84	8.804
774.15	8.442
774.47	8.198
774.79	8.097
775.1	7.911
775.42	7.737
775.74	7.517
776.05	7.349
776.37	7.133
776.68	6.932
777	6.788
777.31	6.637
777.63	6.613
777.95	6.546
778.26	6.295
778.58	6.103
778.89	6.016
779.21	5.957
779.52	5.874
779.84	5.917
780.15	5.932
780.47	5.88
780.79	5.85
781.1	5.733
781.42	5.603
781.73	5.58
782.05	5.539
782.36	5.491
782.68	5.319
782.99	5.215
783.3	4.999
783.62	4.836
783.93	4.735
784.25	4.538
784.56	4.38
784.88	4.339
785.19	4.174
785.51	4.067
785.82	3.765
786.14	3.575
786.45	3.362
786.76	3.306
787.08	3.156
787.39	2.948
787.71	2.87
788.02	2.772
788.33	2.638
788.65	2.703
788.96	2.684
789.28	2.801
789.59	2.974
789.9	3.223
790.22	3.398
790.53	3.779
790.84	4.135
791.16	4.439
791.47	4.664
791.78	4.888
792.1	5.001
792.41	5.171
792.72	5.29
793.04	5.286
793.35	5.105
793.66	5.025
793.98	4.686
794.29	4.385
794.6	4.095
794.91	3.883
795.23	3.515
795.54	3.183
795.85	2.839
796.17	2.526
796.48	2.337
796.79	2.29
797.1	2.14
797.42	2.217
797.73	2.331
798.04	2.386
798.35	2.379
798.66	2.484
798.98	2.569
799.29	2.558
799.6	2.575
799.91	2.556
800.22	2.55
800.54	2.383
800.85	2.216
801.16	2.051
801.47	1.887
801.78	1.685
802.09	1.519
802.41	1.302
802.72	1.124
803.03	0.94
803.34	0.743
803.65	0.493
803.96	0.34
804.27	0.066
804.59	-0.139
804.9	-0.303
805.21	-0.429
805.52	-0.698
805.83	-0.883
806.14	-1.012
806.45	-1.136
806.76	-1.148
807.07	-1.227
807.38	-1.204
807.69	-1.138
808	-1.279
808.31	-1.309
808.63	-1.365
808.94	-1.396
809.25	-1.361
809.56	-1.47
809.87	-1.515
810.18	-1.675
810.49	-1.876
810.8	-2.004
811.11	-2.185
811.42	-2.355
811.73	-2.616
812.04	-2.743
812.35	-3.021
812.66	-3.372
812.97	-3.533
813.28	-3.699
813.58	-3.905
813.89	-3.991
814.2	-4.167
814.51	-4.266
814.82	-4.394
815.13	-4.501
815.44	-4.669
815.75	-4.652
816.06	-4.62
816.37	-4.637
816.68	-4.776
816.99	-4.814
817.3	-4.982
817.6	-5.057
817.91	-5.104
818.22	-4.935
818.53	-4.912
818.84	-4.813
819.15	-4.689
819.46	-4.405
819.76	-4.149
820.07	-3.682
820.38	-3.281
820.69	-2.503
821	-1.91
821.31	-1.074
821.61	-0.22
821.92	0.989
822.23	2.338
822.54	3.834
822.85	5.313
823.15	7.116
823.46	9.252
823.77	11.543
824.08	13.537
824.38	15.168
824.69	16.383
825	17.314
825.31	17.951
825.61	18.394
825.92	18.711
826.23	18.889
826.54	18.984
826.84	19.035
827.15	19.05
827.46	18.987
827.76	18.81
828.07	18.406
828.38	17.83
828.69	17.259
828.99	16.767
829.3	16.432
829.61	16.291
829.91	16.182
830.22	15.985
830.52	15.775
830.83	15.539
831.14	15.269
831.44	14.972
831.75	14.544
832.06	13.92
832.36	12.997
832.67	11.674
832.97	10.052
833.28	8.331
833.59	6.626
833.89	5.132
834.2	3.911
834.5	2.979
834.81	2.668
835.12	3.147
835.42	4.231
835.73	5.741
836.03	7.205
836.34	8.347
836.64	9.078
836.95	9.66
837.25	10.114
837.56	10.407
837.86	10.543
838.17	10.437
838.47	10.054
838.78	9.308
839.08	8.143
839.39	6.491
839.69	4.598
840	2.782
840.3	0.792
840.61	-1.346
840.91	-3.509
841.22	-5.32
841.52	-6.731
841.83	-7.645
842.13	-8.109
842.43	-8.268
842.74	-8.139
843.04	-8.164
843.35	-8.267
843.65	-8.36
843.96	-8.547
844.26	-8.878
844.56	-9.583
844.87	-10.575
845.17	-12.099
845.47	-14.16
845.78	-16.503
846.08	-19.048
846.39	-21.297
846.69	-23.594
846.99	-25.6
847.3	-27.577
847.6	-29.393
847.9	-30.797
848.21	-32.408
848.51	-33.839
848.81	-34.608
849.11	-35.639
849.42	-36.273
849.72	-37.039
850.02	-37.739
850.33	-38.454
850.63	-38.705
850.93	-39.224
851.23	-40.032
851.54	-40.259
851.84	-40.805
852.14	-41.439
852.44	-41.826
852.75	-42.388
853.05	-42.893
853.35	-43.029
853.65	-43.517
853.96	-44.122
854.26	-44.258
854.56	-44.509
854.86	-45.19
855.16	-45.487
855.47	-45.802
855.77	-46.401
856.07	-46.604
856.37	-46.5
856.67	-47.082
856.97	-47.211
857.28	-47.639
857.58	-48.279
857.88	-48.743
858.18	-48.968
858.48	-49.157
858.78	-49.474
859.08	-49.1
859.38	-49.494
859.69	-50.022
859.99	-49.682
860.29	-49.542
860.59	-49.714
860.89	-49.794
861.19	-49.693
861.49	-49.805
861.79	-50.196
862.09	-50.242
862.39	-50.674
862.69	-50.805
862.99	-51.155
863.29	-51.757
863.59	-52.466
863.89	-52.61
864.19	-52.593
864.49	-52.877
864.79	-52.857
865.09	-52.753
865.39	-52.639
865.69	-52.449
865.99	-52.219
866.29	-51.82
866.59	-51.672
866.89	-50.959
867.19	-50.515
867.49	-50.406
867.79	-50.522
868.09	-50.266
868.39	-49.921
[truncated: 48 more rows]

## Sheet: Cestru04
179.25	-2374.33
179.63	-2374.33
180.01	-2374.33
180.38	-7518.44
180.76	-1977.88
181.14	-3269.26
181.51	-3436.44
181.89	-3499.48
182.27	-3721.26
182.65	-3780.09
183.02	-3517.47
183.4	-3269.62
183.78	-3402.91
184.15	-3113.05
184.53	-3239.22
184.91	-2942.96
185.28	-2576.2
185.66	-2368.45
186.04	-2184.22
186.41	-1616.25
186.79	-1195.62
187.17	-1012.81
187.54	-898.636
187.92	-768.321
188.3	-692.247
188.67	-619.861
189.05	-551.673
189.43	-495.533
189.8	-457.388
190.18	-436.471
190.56	-434.057
190.93	-439.981
191.31	-441.593
191.69	-436.568
192.06	-439.521
192.44	-437.722
192.82	-430.298
193.19	-432.255
193.57	-438.003
193.95	-445.127
194.32	-431.699
194.7	-430.103
195.07	-434.165
195.45	-436.715
195.83	-435.246
196.2	-432.845
196.58	-443.017
196.96	-444.138
197.33	-439.866
197.71	-437.709
198.08	-429.054
198.46	-425.123
198.84	-429.395
199.21	-417.92
199.59	-419.127
199.96	-415.157
200.34	-419.028
200.72	-402.578
201.09	-402.566
201.47	-403.627
201.84	-391.447
202.22	-392.524
202.6	-399.713
202.97	-383.816
203.35	-384.935
203.72	-376.443
204.1	-374.226
204.48	-370.018
204.85	-365.667
205.23	-361.269
205.6	-357.219
205.98	-359.075
206.35	-352.722
206.73	-347.102
207.11	-353.213
207.48	-350.81
207.86	-352.855
208.23	-359.74
208.61	-360.424
208.98	-361.007
209.36	-362.901
209.73	-362.987
210.11	-371.107
210.49	-371.615
210.86	-368.58
211.24	-364.163
211.61	-361.316
211.99	-364.145
212.36	-357.719
212.74	-352.749
213.11	-352.83
213.49	-352.355
213.86	-354.74
214.24	-346.68
214.61	-346.436
214.99	-349.662
215.36	-351.393
215.74	-353.108
216.12	-345.86
216.49	-342.155
216.87	-343.152
217.24	-342.033
217.62	-339.588
217.99	-336.519
218.37	-336.126
218.74	-335.864
219.12	-333.916
219.49	-332.46
219.87	-325.198
220.24	-325.365
220.62	-323.455
220.99	-320.599
221.37	-320.333
221.74	-316.727
222.11	-308.367
222.49	-303.068
222.86	-293.414
223.24	-282.128
223.61	-275.415
223.99	-272.418
224.36	-263.745
224.74	-255.036
225.11	-248.182
225.49	-240.145
225.86	-230.154
226.24	-224.73
226.61	-214.65
226.99	-206.105
227.36	-197.658
227.73	-183.808
228.11	-170.527
228.48	-154.043
228.86	-135.615
229.23	-114.571
229.61	-96.168
229.98	-82.327
230.36	-71.093
230.73	-63.543
231.1	-58.295
231.48	-54.645
231.85	-51.649
232.23	-49.152
232.6	-47.429
232.97	-46.391
233.35	-46.626
233.72	-47.814
234.1	-49.269
234.47	-50.361
234.85	-50.63
235.22	-49.734
235.59	-48.187
235.97	-46.825
236.34	-45.262
236.72	-43.774
237.09	-42.568
237.46	-40.928
237.84	-39.368
238.21	-37.811
238.58	-36.772
238.96	-35.933
239.33	-35.285
239.71	-34.408
240.08	-33.264
240.45	-31.892
240.83	-30.211
241.2	-28.065
241.57	-25.895
241.95	-23.26
242.32	-20.57
242.7	-18.075
243.07	-15.728
243.44	-13.74
243.82	-12.194
244.19	-11.139
244.56	-10.458
244.94	-10
245.31	-9.746
245.68	-9.583
246.06	-9.519
246.43	-9.496
246.8	-9.228
247.18	-8.806
247.55	-8.234
247.92	-7.534
248.3	-6.795
248.67	-6.181
249.04	-5.722
249.42	-5.39
249.79	-5.166
250.16	-5.022
250.54	-4.933
250.91	-4.997
251.28	-5.156
251.65	-5.441
252.03	-5.891
252.4	-6.428
252.77	-6.966
253.15	-7.417
253.52	-7.708
253.89	-7.901
254.27	-8.058
254.64	-8.26
255.01	-8.333
255.38	-8.412
255.76	-8.495
256.13	-8.651
256.5	-8.932
256.87	-9.305
257.25	-9.731
257.62	-10.169
257.99	-10.396
258.37	-10.358
258.74	-9.999
259.11	-9.48
259.48	-8.745
259.86	-7.854
260.23	-6.805
260.6	-5.872
260.97	-5.071
261.35	-4.523
261.72	-4.123
262.09	-3.903
262.46	-3.788
262.84	-3.708
263.21	-3.665
263.58	-3.67
263.95	-3.732
264.32	-3.907
264.7	-4.17
265.07	-4.582
265.44	-5.068
265.81	-5.641
266.19	-6.088
266.56	-6.352
266.93	-6.464
267.3	-6.48
267.67	-6.392
268.05	-6.248
268.42	-6.099
268.79	-5.929
269.16	-5.771
269.53	-5.649
269.9	-5.52
270.28	-5.427
270.65	-5.367
271.02	-5.316
271.39	-5.254
271.76	-5.24
272.14	-5.176
272.51	-5.066
272.88	-4.96
273.25	-4.847
273.62	-4.718
273.99	-4.605
274.37	-4.51
274.74	-4.431
275.11	-4.419
275.48	-4.447
275.85	-4.48
276.22	-4.572
276.59	-4.69
276.97	-4.82
277.34	-4.955
277.71	-5.082
278.08	-5.214
278.45	-5.348
278.82	-5.453
279.19	-5.524
279.57	-5.587
279.94	-5.623
280.31	-5.627
280.68	-5.65
281.05	-5.647
281.42	-5.638
281.79	-5.616
282.16	-5.577
282.53	-5.471
282.91	-5.351
283.28	-5.221
283.65	-5.074
284.02	-4.987
284.39	-4.918
284.76	-4.823
285.13	-4.749
285.5	-4.65
285.87	-4.533
286.24	-4.405
286.61	-4.274
286.99	-4.179
287.36	-4.071
287.73	-4.018
288.1	-3.957
288.47	-3.919
288.84	-3.906
289.21	-3.904
289.58	-3.935
289.95	-3.992
290.32	-4.044
290.69	-4.123
291.06	-4.189
291.43	-4.235
291.8	-4.248
292.17	-4.264
292.54	-4.288
292.91	-4.31
293.28	-4.337
293.65	-4.353
294.02	-4.399
294.4	-4.465
294.77	-4.539
295.14	-4.586
295.51	-4.652
295.88	-4.711
296.25	-4.714
296.62	-4.674
296.99	-4.608
297.36	-4.487
297.73	-4.327
298.1	-4.133
298.47	-3.958
298.84	-3.805
299.21	-3.715
299.58	-3.68
299.95	-3.673
300.32	-3.706
300.69	-3.73
301.06	-3.784
301.42	-3.87
301.79	-3.984
302.16	-4.15
302.53	-4.326
302.9	-4.533
303.27	-4.664
303.64	-4.792
304.01	-4.84
304.38	-4.853
304.75	-4.872
305.12	-4.851
305.49	-4.824
305.86	-4.841
306.23	-4.824
306.6	-4.84
306.97	-4.85
307.34	-4.92
307.71	-4.929
308.08	-4.983
308.45	-5.04
308.81	-5.078
309.18	-5.113
309.55	-5.125
309.92	-5.08
310.29	-5.032
310.66	-4.957
311.03	-4.858
311.4	-4.76
311.77	-4.679
312.14	-4.571
312.51	-4.501
312.87	-4.465
313.24	-4.455
313.61	-4.481
313.98	-4.557
314.35	-4.681
314.72	-4.829
315.09	-4.996
315.46	-5.195
315.83	-5.388
316.19	-5.625
316.56	-5.856
316.93	-6.116
317.3	-6.351
317.67	-6.572
318.04	-6.704
318.41	-6.818
318.77	-6.894
319.14	-6.954
319.51	-7.022
319.88	-7.12
320.25	-7.213
320.62	-7.288
320.99	-7.363
321.35	-7.461
321.72	-7.564
322.09	-7.732
322.46	-7.846
322.83	-7.976
323.19	-8.107
323.56	-8.21
323.93	-8.268
324.3	-8.292
324.67	-8.321
325.04	-8.264
325.4	-8.202
325.77	-8.11
326.14	-8.038
326.51	-7.973
326.88	-7.926
327.24	-7.875
327.61	-7.82
327.98	-7.826
328.35	-7.851
328.71	-7.878
329.08	-7.946
329.45	-8.025
329.82	-8.106
330.19	-8.185
330.55	-8.279
330.92	-8.375
331.29	-8.475
331.66	-8.575
332.02	-8.66
332.39	-8.725
332.76	-8.776
333.13	-8.824
333.49	-8.839
333.86	-8.847
334.23	-8.831
334.6	-8.779
334.96	-8.757
335.33	-8.73
335.7	-8.701
336.07	-8.655
336.43	-8.642
336.8	-8.606
337.17	-8.591
337.53	-8.563
337.9	-8.558
338.27	-8.555
338.64	-8.575
339	-8.585
339.37	-8.613
339.74	-8.645
340.1	-8.646
340.47	-8.669
340.84	-8.718
341.2	-8.75
341.57	-8.819
341.94	-8.85
342.3	-8.879
342.67	-8.865
343.04	-8.855
343.4	-8.858
343.77	-8.857
344.14	-8.878
344.5	-8.863
344.87	-8.828
345.24	-8.795
345.6	-8.719
345.97	-8.712
346.34	-8.696
346.7	-8.693
347.07	-8.677
347.44	-8.645
347.8	-8.651
348.17	-8.655
348.54	-8.671
348.9	-8.713
349.27	-8.788
349.63	-8.86
350	-8.901
350.37	-8.923
350.73	-8.96
351.1	-9.019
351.46	-9.062
351.83	-9.072
352.2	-9.098
352.56	-9.112
352.93	-9.157
353.29	-9.148
353.66	-9.158
354.03	-9.174
354.39	-9.179
354.76	-9.214
355.12	-9.202
355.49	-9.214
355.86	-9.207
356.22	-9.178
356.59	-9.145
356.95	-9.084
357.32	-9.031
357.68	-8.987
358.05	-8.901
358.41	-8.847
358.78	-8.776
359.15	-8.71
359.51	-8.667
359.88	-8.645
360.24	-8.647
360.61	-8.641
360.97	-8.609
361.34	-8.575
361.7	-8.529
362.07	-8.479
362.43	-8.404
362.8	-8.319
363.16	-8.255
363.53	-8.207
363.89	-8.166
364.26	-8.129
364.62	-8.107
364.99	-8.107
365.35	-8.137
365.72	-8.161
366.08	-8.216
366.45	-8.291
366.81	-8.377
367.18	-8.477
367.54	-8.532
367.91	-8.563
368.27	-8.57
368.64	-8.598
369	-8.607
369.37	-8.594
369.73	-8.599
370.1	-8.594
370.46	-8.592
370.83	-8.587
371.19	-8.568
371.55	-8.531
371.92	-8.498
372.28	-8.468
372.65	-8.393
373.01	-8.32
373.38	-8.262
373.74	-8.205
374.11	-8.135
374.47	-8.076
374.83	-8.013
375.2	-7.954
375.56	-7.923
375.93	-7.871
376.29	-7.813
376.65	-7.758
377.02	-7.693
377.38	-7.602
377.75	-7.504
378.11	-7.377
378.47	-7.234
378.84	-7.116
379.2	-6.984
379.57	-6.857
379.93	-6.773
380.29	-6.682
380.66	-6.599
381.02	-6.52
381.38	-6.427
381.75	-6.332
382.11	-6.273
382.48	-6.241
382.84	-6.169
383.2	-6.103
383.57	-6.033
383.93	-5.922
384.29	-5.792
384.66	-5.667
385.02	-5.541
385.38	-5.405
385.75	-5.269
386.11	-5.107
386.47	-4.943
386.84	-4.806
387.2	-4.653
387.56	-4.481
387.93	-4.331
388.29	-4.185
388.65	-4.028
389.02	-3.861
389.38	-3.721
389.74	-3.565
390.1	-3.414
390.47	-3.233
390.83	-3.037
391.19	-2.842
391.56	-2.642
391.92	-2.397
392.28	-2.131
392.64	-1.856
393.01	-1.609
393.37	-1.346
393.73	-1.101
394.09	-0.858
394.46	-0.6
394.82	-0.327
395.18	-0.047
395.55	0.235
395.91	0.503
396.27	0.755
396.63	1.021
396.99	1.306
397.36	1.592
397.72	1.887
398.08	2.192
398.44	2.497
398.81	2.825
399.17	3.161
399.53	3.514
399.89	3.897
400.25	4.294
400.62	4.695
400.98	5.1
401.34	5.499
401.7	5.91
402.06	6.337
402.43	6.771
402.79	7.203
403.15	7.654
403.51	8.123
403.87	8.608
404.24	9.104
404.6	9.615
404.96	10.149
405.32	10.703
405.68	11.243
406.04	11.766
406.41	12.283
406.77	12.795
407.13	13.316
407.49	13.825
407.85	14.332
408.21	14.853
408.57	15.379
408.94	15.916
409.3	16.46
409.66	17.02
410.02	17.606
410.38	18.219
410.74	18.868
411.1	19.492
411.46	20.131
411.83	20.752
412.19	21.371
412.55	21.956
412.91	22.533
413.27	23.105
413.63	23.699
413.99	24.28
414.35	24.86
414.71	25.467
415.07	26.096
415.43	26.737
415.8	27.379
416.16	28.032
416.52	28.679
416.88	29.338
417.24	29.982
417.6	30.593
417.96	31.214
418.32	31.823
418.68	32.41
419.04	32.99
419.4	33.571
419.76	34.132
420.12	34.666
420.48	35.195
420.84	35.717
421.2	36.221
421.56	36.695
421.92	37.179
422.28	37.641
422.64	38.098
423	38.552
423.36	38.984
423.72	39.418
424.08	39.848
424.44	40.273
424.8	40.672
425.16	41.082
425.52	41.512
425.88	41.946
426.24	42.388
426.6	42.813
426.96	43.203
427.32	43.581
427.68	43.933
428.04	44.284
428.4	44.651
428.76	45.063
429.12	45.482
429.48	45.926
429.84	46.363
430.2	46.788
430.56	47.183
430.92	47.554
431.28	47.904
431.64	48.239
432	48.563
432.35	48.876
432.71	49.155
433.07	49.441
433.43	49.716
433.79	49.974
434.15	50.227
434.51	50.471
434.87	50.74
435.23	51.012
435.59	51.287
435.95	51.55
436.3	51.813
436.66	52.067
437.02	52.355
437.38	52.614
437.74	52.901
438.1	53.192
438.46	53.503
438.82	53.774
439.17	54.035
439.53	54.228
439.89	54.418
440.25	54.549
440.61	54.692
440.97	54.812
441.33	54.954
441.68	55.073
442.04	55.216
442.4	55.356
442.76	55.506
443.12	55.664
443.48	55.845
443.83	56.012
444.19	56.185
444.55	56.362
444.91	56.536
445.27	56.693
445.62	56.852
445.98	56.961
446.34	57.049
446.7	57.093
447.06	57.112
447.41	57.128
447.77	57.168
448.13	57.235
448.49	57.317
448.84	57.415
449.2	57.544
449.56	57.668
449.92	57.825
450.28	57.982
450.63	58.166
450.99	58.364
451.35	58.562
451.71	58.759
452.06	58.946
452.42	59.094
452.78	59.206
453.14	59.275
453.49	59.354
453.85	59.406
454.21	59.469
454.56	59.544
454.92	59.585
455.28	59.636
455.64	59.674
455.99	59.704
456.35	59.763
456.71	59.844
457.06	59.932
457.42	60.026
457.78	60.126
458.13	60.209
458.49	60.245
458.85	60.308
459.2	60.335
459.56	60.354
459.92	60.369
460.27	60.358
460.63	60.324
460.99	60.286
461.34	60.303
461.7	60.344
462.06	60.411
462.41	60.491
462.77	60.576
463.13	60.668
463.48	60.76
463.84	60.869
464.2	61.005
464.55	61.17
464.91	61.377
465.26	61.554
465.62	61.666
465.98	61.724
466.33	61.801
466.69	61.848
467.04	61.908
467.4	61.941
467.76	61.944
468.11	61.937
468.47	61.966
468.82	61.994
469.18	62.032
469.53	62.099
469.89	62.185
470.25	62.241
470.6	62.292
470.96	62.344
471.31	62.415
471.67	62.525
472.02	62.654
472.38	62.732
472.74	62.822
473.09	62.884
473.45	62.95
473.8	62.995
474.16	63.047
474.51	63.105
474.87	63.178
475.22	63.251
475.58	63.309
475.93	63.35
476.29	63.419
476.64	63.456
477	63.492
477.35	63.488
477.71	63.505
478.06	63.514
478.42	63.519
478.77	63.507
479.13	63.498
479.48	63.491
479.84	63.495
480.19	63.496
480.55	63.514
480.9	63.539
481.25	63.585
481.61	63.608
481.96	63.623
482.32	63.646
482.67	63.644
483.03	63.695
483.38	63.731
483.74	63.761
484.09	63.888
484.44	65.115
484.8	67.943
485.15	70.858
485.51	72.59
485.86	72.981
486.22	72.826
486.57	72.699
486.92	72.601
487.28	72.537
487.63	72.495
487.99	72.535
488.34	72.228
488.69	70.892
489.05	69.036
489.4	67.55
489.75	66.885
490.11	66.764
490.46	66.767
490.82	66.804
491.17	66.856
491.52	66.92
491.88	66.907
492.23	66.659
492.58	66.354
492.94	66.126
493.29	65.924
493.64	65.883
494	65.911
494.35	65.931
494.7	65.95
495.06	65.982
495.41	66.02
495.76	66.091
496.12	66.161
496.47	65.983
496.82	65.65
497.17	65.506
497.53	65.442
497.88	65.348
498.23	65.28
498.59	65.252
498.94	65.225
499.29	65.209
499.64	65.21
500	65.205
500.35	65.219
500.7	65.242
501.05	65.263
501.41	65.32
501.76	65.39
502.11	65.434
502.46	65.472
502.82	65.505
503.17	65.547
503.52	65.576
503.87	65.617
504.23	65.643
504.58	65.646
504.93	65.644
505.28	65.629
505.63	65.649
505.99	65.669
506.34	65.678
506.69	65.716
507.04	65.735
507.39	65.746
507.75	65.76
508.1	65.778
508.45	65.785
508.8	65.798
509.15	65.792
509.5	65.746
509.86	65.703
510.21	65.695
510.56	65.673
510.91	65.652
511.26	65.665
511.61	65.678
511.97	65.698
512.32	65.718
512.67	65.759
513.02	65.782
513.37	65.817
513.72	65.857
514.07	65.89
514.42	65.924
514.78	65.98
515.13	66.001
515.48	66.03
515.83	66.055
516.18	66.087
516.53	66.111
516.88	66.163
517.23	66.211
517.58	66.248
517.93	66.244
518.28	66.216
518.64	66.173
518.99	66.15
519.34	66.095
519.69	66.061
520.04	66.031
520.39	66.015
520.74	66.019
521.09	66.033
521.44	66.058
521.79	66.089
522.14	66.127
522.49	66.172
522.84	66.2
523.19	66.261
523.54	66.312
523.89	66.363
524.24	66.385
524.59	66.412
524.94	66.412
525.29	66.4
525.64	66.383
525.99	66.355
526.34	66.309
526.69	66.256
527.04	66.232
527.39	66.239
527.74	66.255
528.09	66.298
528.44	66.325
528.79	66.371
529.14	66.8
529.49	68.285
529.84	70.311
530.19	71.902
530.54	72.719
530.89	72.919
531.24	72.925
531.59	72.922
531.93	72.927
532.28	72.967
532.63	73.063
532.98	73.003
533.33	72.005
533.68	70.158
534.03	68.395
534.38	67.445
534.73	67.262
535.08	67.232
535.43	67.227
535.77	67.231
536.12	67.261
536.47	67.306
536.82	67.33
537.17	67.335
537.52	67.329
537.87	67.276
538.22	67.105
538.56	66.883
538.91	66.794
539.26	66.765
539.61	66.759
539.96	66.731
540.31	66.713
540.65	66.704
541	66.734
541.35	66.754
541.7	66.788
542.05	66.857
542.4	67.279
542.74	67.858
543.09	68.129
543.44	68.174
543.79	68.169
544.14	68.155
544.48	68.145
544.83	68.138
545.18	68.165
545.53	68.221
545.87	68.26
546.22	68.002
546.57	67.495
546.92	67.153
547.26	67.015
547.61	66.932
547.96	66.864
548.31	66.827
548.65	66.835
549	66.843
549.35	66.843
549.7	66.866
550.04	66.903
550.39	66.944
550.74	67
551.09	67.052
551.43	67.124
551.78	67.215
552.13	67.292
552.47	67.333
552.82	67.351
553.17	67.318
553.51	67.254
553.86	67.183
554.21	67.151
554.55	67.118
554.9	67.093
555.25	67.095
555.59	67.098
555.94	67.098
556.29	67.103
556.63	67.119
556.98	67.179
557.33	67.254
557.67	67.324
558.02	67.365
558.37	67.407
558.71	67.442
559.06	67.457
559.4	67.484
559.75	67.509
560.1	67.54
560.44	67.551
560.79	67.552
561.14	67.562
561.48	67.574
561.83	67.578
562.17	67.57
562.52	67.549
562.86	67.545
563.21	67.541
563.56	67.533
563.9	67.524
564.25	67.536
564.59	67.551
564.94	67.55
565.28	67.565
565.63	67.585
565.97	67.602
566.32	67.609
566.67	67.597
567.01	67.53
567.36	67.463
567.7	67.404
568.05	67.357
568.39	67.355
568.74	67.361
569.08	67.384
569.43	67.422
569.77	67.45
570.12	67.491
570.46	67.534
570.81	67.604
571.15	67.698
571.5	67.775
571.84	67.829
572.19	67.818
572.53	67.787
572.87	67.727
573.22	67.645
573.56	67.602
573.91	67.581
574.25	67.585
574.6	67.604
574.94	67.591
575.29	67.603
575.63	67.6
575.97	67.609
576.32	67.633
576.66	67.659
577.01	67.716
577.35	67.774
577.7	67.809
578.04	67.826
578.38	67.834
578.73	67.876
579.07	67.892
579.41	67.938
579.76	68.004
580.1	68.074
580.45	68.143
580.79	68.204
581.13	68.241
581.48	68.291
581.82	68.327
582.16	68.355
582.51	68.362
582.85	68.403
583.19	68.424
583.54	68.448
583.88	68.426
584.22	68.434
584.57	68.424
584.91	68.418
585.25	68.428
585.6	68.425
585.94	68.427
586.28	68.424
586.63	68.415
586.97	68.414
587.31	68.41
587.65	68.423
588	68.419
588.34	68.405
588.68	68.415
589.03	68.393
589.37	68.379
589.71	68.373
590.05	68.367
590.4	68.331
590.74	68.317
591.08	68.284
591.42	68.277
591.77	68.269
592.11	68.266
592.45	68.271
592.79	68.28
593.13	68.283
593.48	68.302
593.82	68.318
594.16	68.367
594.5	68.378
594.85	68.395
595.19	68.395
595.53	68.366
595.87	68.371
596.21	68.336
596.55	68.333
596.9	68.33
597.24	68.291
597.58	68.234
597.92	68.119
598.26	68.03
598.6	67.945
598.95	67.911
599.29	67.933
599.63	67.964
599.97	68.004
600.31	68.023
600.65	68.043
600.99	68.067
601.34	68.12
601.68	68.208
602.02	68.31
602.36	68.437
602.7	68.531
603.04	68.558
603.38	68.529
603.72	68.475
604.06	68.396
604.4	68.325
604.74	68.275
605.09	68.191
605.43	68.081
605.77	67.989
606.11	67.882
606.45	67.788
606.79	67.755
607.13	67.762
607.47	67.796
607.81	67.839
608.15	67.89
608.49	67.927
608.83	68.007
609.17	68.115
609.51	68.197
609.85	68.283
610.19	68.33
610.53	68.293
610.87	68.214
611.21	68.139
611.55	68.099
611.89	68.075
612.23	68.071
612.57	68.062
612.91	68.054
613.25	68.071
613.59	68.098
613.93	68.158
614.27	68.247
614.61	68.354
614.95	68.433
615.29	68.465
615.63	68.483
615.97	68.489
616.31	68.476
616.64	68.469
616.98	68.456
617.32	68.456
617.66	68.469
618	68.466
618.34	68.435
618.68	68.407
619.02	68.375
619.36	68.343
619.7	68.319
620.03	68.274
620.37	68.268
620.71	68.247
621.05	68.231
621.39	68.197
621.73	68.185
622.07	68.185
622.41	68.199
622.74	68.231
623.08	68.253
623.42	68.261
623.76	68.276
624.1	68.278
624.44	68.275
624.77	68.258
625.11	68.281
625.45	68.29
625.79	68.29
626.13	68.292
626.46	68.283
626.8	68.238
627.14	68.193
627.48	68.148
627.82	68.066
628.15	68.022
628.49	68.005
628.83	67.946
629.17	67.914
629.5	67.926
629.84	67.922
630.18	67.92
630.52	67.929
630.85	67.943
631.19	67.976
631.53	68.033
631.87	68.075
632.2	68.103
632.54	68.145
632.88	68.167
633.22	68.133
633.55	68.131
633.89	68.11
634.23	68.1
634.56	68.092
634.9	68.067
635.24	68.036
635.57	67.993
635.91	67.981
636.25	67.972
636.58	67.963
636.92	67.997
637.26	67.974
637.59	67.972
637.93	67.983
638.27	67.992
638.6	68.025
638.94	68.08
639.28	68.119
639.61	68.129
639.95	68.139
640.28	68.13
640.62	68.112
640.96	68.127
641.29	68.16
641.63	68.183
641.96	68.194
642.3	68.179
642.64	68.149
642.97	68.15
643.31	68.132
643.64	68.112
643.98	68.106
644.32	68.083
644.65	68.076
644.99	68.031
645.32	68.019
645.66	68.007
645.99	68
646.33	67.973
646.66	67.952
647	67.945
647.33	67.919
647.67	67.922
648	67.907
648.34	67.873
648.68	67.862
649.01	67.805
649.35	67.781
649.68	67.743
650.01	67.73
650.35	67.731
650.68	67.713
651.02	67.706
651.35	67.68
651.69	67.655
652.02	67.635
652.36	67.632
652.69	67.647
653.03	67.658
653.36	67.689
653.7	67.683
654.03	67.656
654.36	67.625
654.7	67.639
655.03	67.626
655.37	67.622
655.7	67.636
656.04	67.628
656.37	67.615
656.7	67.583
657.04	67.56
657.37	67.549
657.71	67.533
658.04	67.565
658.37	67.528
658.71	67.508
659.04	67.483
659.37	67.444
659.71	67.412
660.04	67.383
660.37	67.281
660.71	67.198
661.04	67.169
661.37	67.146
661.71	67.147
662.04	67.152
662.37	67.172
662.71	67.178
663.04	67.174
663.37	67.175
663.71	67.18
664.04	67.239
664.37	67.259
664.71	67.242
665.04	67.25
665.37	67.181
665.7	67.131
666.04	67.063
666.37	67.006
666.7	66.974
667.03	66.947
667.37	66.872
667.7	66.837
668.03	66.806
668.36	66.788
668.7	66.749
669.03	66.724
669.36	66.683
669.69	66.649
670.03	66.632
670.36	66.594
670.69	66.543
671.02	66.507
671.35	66.461
671.69	66.464
672.02	66.428
672.35	66.39
672.68	66.376
673.01	66.344
673.35	66.299
673.68	66.291
674.01	66.248
674.34	66.217
674.67	66.197
675	66.171
675.33	66.101
675.67	66.066
676	65.998
676.33	65.947
676.66	65.913
676.99	65.905
677.32	65.845
677.65	65.796
677.98	65.751
678.31	65.7
678.65	65.673
678.98	65.642
679.31	65.618
679.64	65.595
679.97	65.535
680.3	65.534
680.63	65.469
680.96	65.441
681.29	65.409
681.62	65.356
681.95	65.325
682.28	65.268
682.61	65.256
682.94	65.223
683.27	65.167
683.6	65.139
683.93	65.073
684.27	65.04
684.6	64.986
684.93	64.944
685.26	64.886
685.59	64.815
685.92	64.772
686.25	64.658
686.57	64.57
686.9	64.518
687.23	64.432
687.56	64.322
687.89	64.227
688.22	64.116
688.55	64.018
688.88	63.904
689.21	63.817
689.54	63.682
689.87	63.58
690.2	63.474
690.53	63.361
690.86	63.276
691.19	63.168
691.52	63.079
691.85	62.996
692.17	62.899
692.5	62.875
692.83	62.792
693.16	62.76
693.49	62.724
693.82	62.657
694.15	62.623
694.48	62.526
694.81	62.506
695.13	62.457
695.46	62.418
695.79	62.358
696.12	62.247
696.45	62.19
696.78	62.106
697.1	61.974
697.43	61.886
697.76	61.823
698.09	61.766
698.42	61.678
698.75	61.559
699.07	61.446
699.4	61.357
699.73	61.274
700.06	61.167
700.38	61.094
700.71	61.087
701.04	61.071
701.37	61.024
701.7	61.021
702.02	60.971
702.35	60.955
702.68	60.945
703.01	60.896
703.33	60.821
703.66	60.758
703.99	60.647
704.32	60.483
704.64	60.321
704.97	60.113
705.3	59.881
705.62	59.711
705.95	59.525
706.28	59.283
706.6	59.149
706.93	59.016
707.26	58.894
707.58	58.788
707.91	58.707
708.24	58.569
708.56	58.466
708.89	58.369
709.22	58.21
709.54	58.07
709.87	57.964
710.2	57.807
710.52	57.648
710.85	57.474
711.18	57.303
711.5	57.15
711.83	56.961
712.15	56.8
712.48	56.609
712.81	56.458
713.13	56.306
713.46	56.135
713.78	55.982
714.11	55.882
714.44	55.799
714.76	55.699
715.09	55.602
715.41	55.534
715.74	55.455
716.06	55.414
716.39	55.387
716.71	55.295
717.04	55.263
717.37	55.23
717.69	55.215
718.02	55.161
718.34	55.121
718.67	55.019
718.99	54.951
719.32	54.904
719.64	54.8
719.97	54.658
720.29	54.572
720.62	54.436
720.94	54.26
721.27	54.069
721.59	53.849
721.91	53.607
722.24	53.426
722.56	53.246
722.89	52.988
723.21	52.757
723.54	52.576
723.86	52.386
724.19	52.13
724.51	51.977
724.83	51.802
725.16	51.644
725.48	51.475
725.81	51.313
726.13	51.112
726.45	51.023
726.78	50.944
727.1	50.802
727.43	50.685
727.75	50.652
728.07	50.499
728.4	50.393
728.72	50.333
729.04	50.268
729.37	50.19
729.69	50.172
730.01	50.071
730.34	49.983
730.66	49.941
730.98	49.896
731.31	49.869
731.63	49.886
731.95	49.879
732.28	49.822
732.6	49.787
732.92	49.748
733.25	49.716
733.57	49.663
733.89	49.662
734.21	49.626
734.54	49.546
734.86	49.52
735.18	49.44
735.5	49.352
735.83	49.346
736.15	49.297
736.47	49.274
736.79	49.154
737.12	49.082
737.44	48.955
737.76	48.845
738.08	48.741
738.4	48.538
738.73	48.319
739.05	48.096
739.37	47.906
739.69	47.68
740.01	47.402
740.34	47.21
740.66	47.033
740.98	46.807
741.3	46.62
741.62	46.501
741.94	46.388
742.27	46.316
742.59	46.23
742.91	46.068
743.23	46.01
743.55	45.914
743.87	45.836
744.19	45.704
744.51	45.64
744.84	45.559
745.16	45.449
745.48	45.347
745.8	45.229
746.12	45.109
746.44	44.926
746.76	44.792
747.08	44.687
747.4	44.542
747.72	44.468
748.04	44.299
748.36	44.175
748.68	44.028
749	43.897
749.33	43.78
749.65	43.735
749.97	43.669
750.29	43.582
750.61	43.505
750.93	43.347
751.25	43.242
751.57	43.228
751.89	43.118
752.21	43.032
752.53	42.922
752.85	42.802
753.17	42.668
753.49	42.586
753.8	42.474
754.12	42.367
754.44	42.335
754.76	42.308
755.08	42.19
755.4	42.186
755.72	42.109
756.04	41.997
756.36	41.941
756.68	41.815
757	41.772
757.32	41.671
757.64	41.542
757.96	41.502
758.27	41.384
758.59	41.266
758.91	41.1
759.23	40.997
759.55	40.919
759.87	40.84
760.19	40.755
760.51	40.623
760.82	40.583
761.14	40.672
761.46	40.605
761.78	40.525
762.1	40.541
762.42	40.566
762.73	40.521
763.05	40.578
763.37	40.66
763.69	40.718
764.01	40.83
764.32	41.022
764.64	41.237
764.96	41.609
765.28	42.071
765.6	42.478
765.91	42.896
766.23	43.336
766.55	43.609
766.87	43.824
767.18	44.006
767.5	44.188
767.82	44.247
768.14	44.264
768.45	44.18
768.77	43.994
769.09	43.778
769.4	43.371
769.72	42.856
770.04	42.39
770.36	41.95
770.67	41.56
770.99	41.011
771.31	40.495
771.62	40.041
771.94	39.636
772.26	39.229
772.57	38.867
772.89	38.565
773.21	38.38
773.52	38.255
773.84	37.991
774.15	37.8
774.47	37.628
774.79	37.537
775.1	37.358
775.42	37.122
775.74	36.92
776.05	36.718
776.37	36.502
776.68	36.288
777	36.033
777.31	35.916
777.63	35.717
777.95	35.65
778.26	35.471
778.58	35.267
778.89	35.232
779.21	35.207
779.52	35.189
779.84	35.247
780.15	35.287
780.47	35.267
780.79	35.149
781.1	35.09
781.42	34.965
781.73	34.91
782.05	34.889
782.36	34.736
782.68	34.567
782.99	34.449
783.3	34.342
783.62	34.108
783.93	34.042
784.25	33.892
784.56	33.768
784.88	33.679
785.19	33.575
785.51	33.422
785.82	33.257
786.14	33.092
786.45	32.897
786.76	32.732
787.08	32.662
787.39	32.469
787.71	32.523
788.02	32.546
788.33	32.495
788.65	32.485
788.96	32.518
789.28	32.584
789.59	32.737
789.9	32.885
790.22	33.023
790.53	33.259
790.84	33.48
791.16	33.631
791.47	33.757
791.78	33.957
792.1	34.111
792.41	34.172
792.72	34.259
793.04	34.269
793.35	34.209
793.66	34.073
793.98	33.921
794.29	33.694
794.6	33.405
794.91	33.188
795.23	32.876
795.54	32.456
795.85	32.173
796.17	31.937
796.48	31.721
796.79	31.553
797.1	31.501
797.42	31.389
797.73	31.328
798.04	31.4
798.35	31.38
798.66	31.426
798.98	31.497
799.29	31.591
799.6	31.531
799.91	31.517
800.22	31.552
800.54	31.426
800.85	31.35
801.16	31.328
801.47	31.134
801.78	30.953
802.09	30.762
802.41	30.692
802.72	30.483
803.03	30.392
803.34	30.249
803.65	30.014
803.96	29.921
804.27	29.728
804.59	29.498
804.9	29.406
805.21	29.18
805.52	28.927
805.83	28.716
806.14	28.546
806.45	28.454
806.76	28.44
807.07	28.326
807.38	28.238
807.69	28.075
808	27.906
808.31	27.767
808.63	27.756
808.94	27.749
809.25	27.627
809.56	27.562
809.87	27.409
810.18	27.197
810.49	27.09
810.8	26.957
811.11	26.901
811.42	26.741
811.73	26.623
812.04	26.497
812.35	26.343
812.66	26.085
812.97	25.949
813.28	25.776
813.58	25.561
813.89	25.372
814.2	25.236
814.51	25.091
814.82	25.076
815.13	24.763
815.44	24.528
815.75	24.329
816.06	24.401
816.37	24.284
816.68	24.167
816.99	24.127
817.3	24.012
817.6	24.032
817.91	23.951
818.22	24.105
818.53	24.388
818.84	24.486
819.15	24.869
819.46	24.987
819.76	25.132
820.07	25.582
820.38	25.989
820.69	26.684
821	27.275
821.31	28.105
821.61	28.806
821.92	29.767
822.23	30.977
822.54	32.088
822.85	33.652
823.15	35.468
823.46	37.351
823.77	39.193
824.08	40.795
824.38	42.014
824.69	43.007
825	43.879
825.31	44.603
825.61	45.135
825.92	45.576
826.23	45.837
826.54	46.019
826.84	46.178
827.15	46.379
827.46	46.585
827.76	46.782
828.07	46.832
828.38	46.59
828.69	46.088
828.99	45.546
829.3	45.076
829.61	44.753
829.91	44.456
830.22	44.18
830.52	43.908
830.83	43.6
831.14	43.312
831.44	43.024
831.75	42.676
832.06	42.25
832.36	41.667
832.67	40.703
832.97	39.392
833.28	38.026
833.59	36.508
833.89	35.091
834.2	33.854
834.5	32.854
834.81	32.317
835.12	32.401
835.42	32.868
835.73	33.758
836.03	34.79
836.34	35.715
836.64	36.404
836.95	36.922
837.25	37.328
837.56	37.623
837.86	37.774
838.17	37.742
838.47	37.488
838.78	37.044
839.08	36.256
839.39	35.076
839.69	33.696
840	32.108
840.3	30.4
840.61	28.507
840.91	26.51
841.22	24.68
841.52	23.218
841.83	22.235
842.13	21.693
842.43	21.37
842.74	21.286
843.04	21.042
843.35	20.92
843.65	20.876
843.96	20.677
844.26	20.38
844.56	20.015
844.87	19.062
845.17	17.731
845.47	16.019
845.78	14.068
846.08	11.867
846.39	9.85
846.69	7.711
846.99	5.641
847.3	3.882
847.6	2.174
847.9	0.404
848.21	-1.076
848.51	-2.29
848.81	-3.391
849.11	-4.538
849.42	-5.315
849.72	-6.121
850.02	-6.964
850.33	-7.807
850.63	-8.097
850.93	-8.611
851.23	-9.026
851.54	-9.377
851.84	-10.077
852.14	-10.859
852.44	-11.417
852.75	-12.042
853.05	-12.516
853.35	-12.691
853.65	-13.212
853.96	-13.915
854.26	-13.884
854.56	-14.145
854.86	-14.629
855.16	-15.06
855.47	-15.066
855.77	-15.59
856.07	-15.881
856.37	-15.87
856.67	-16.22
856.97	-15.947
857.28	-16.359
857.58	-17.017
857.88	-17.572
858.18	-17.975
858.48	-18.024
858.78	-18.472
859.08	-18.264
859.38	-18.534
859.69	-18.935
859.99	-18.925
860.29	-19.245
860.59	-19.309
860.89	-19.389
861.19	-19.201
861.49	-18.995
861.79	-19.387
862.09	-19.407
862.39	-19.369
862.69	-19.401
862.99	-19.718
863.29	-20.099
863.59	-20.261
863.89	-20.236
864.19	-20.144
864.49	-20.547
864.79	-20.775
865.09	-20.673
865.39	-20.473
865.69	-20.65
865.99	-20.458
866.29	-20.169
866.59	-19.974
866.89	-19.673
867.19	-19.733
867.49	-19.589
867.79	-19.438
868.09	-19.228
868.39	-18.993
[truncated: 48 more rows]

## Sheet: Cestru05
179.25	-2515.18
179.63	-2515.18
180.01	-2515.18
180.38	-8034.75
180.76	-2142.91
181.14	-3480.36
181.51	-3660.38
181.89	-3740.64
182.27	-3991.43
182.65	-4059.43
183.02	-3767.36
183.4	-3506.8
183.78	-3669.38
184.15	-3369.38
184.53	-3506.41
184.91	-3190.69
185.28	-2800
185.66	-2578.63
186.04	-2379.91
186.41	-1763.24
186.79	-1309.49
187.17	-1111.66
187.54	-989.407
187.92	-848.743
188.3	-767.697
188.67	-690.942
189.05	-617.785
189.43	-557.92
189.8	-518.26
190.18	-495.043
190.56	-491.335
190.93	-499.429
191.31	-504.746
191.69	-500.059
192.06	-503.025
192.44	-499.59
192.82	-490.283
193.19	-493.141
193.57	-498.109
193.95	-505.038
194.32	-492.188
194.7	-493.082
195.07	-495.647
195.45	-497.631
195.83	-495.683
196.2	-492.627
196.58	-507.191
196.96	-510.737
197.33	-504.042
197.71	-504.151
198.08	-494.256
198.46	-487.919
198.84	-492.706
199.21	-479.677
199.59	-481.223
199.96	-476.998
200.34	-482.474
200.72	-462.449
201.09	-462.381
201.47	-464.178
201.84	-449.54
202.22	-452.296
202.6	-460.147
202.97	-441.882
203.35	-444.697
203.72	-433.299
204.1	-430.142
204.48	-424.031
204.85	-417.885
205.23	-411.317
205.6	-406.833
205.98	-409.265
206.35	-401.912
206.73	-395.831
207.11	-400.89
207.48	-397.695
207.86	-402.035
208.23	-408.124
208.61	-410.042
208.98	-413.296
209.36	-415.943
209.73	-415.947
210.11	-423.889
210.49	-424.491
210.86	-421.192
211.24	-418.678
211.61	-415.867
211.99	-419.264
212.36	-414.669
212.74	-409.257
213.11	-409.59
213.49	-410.415
213.86	-413.378
214.24	-405.183
214.61	-404.532
214.99	-408.292
215.36	-410.816
215.74	-412.981
216.12	-403.893
216.49	-398.729
216.87	-400.316
217.24	-397.78
217.62	-392.611
217.99	-389.003
218.37	-387.617
218.74	-384.698
219.12	-382.297
219.49	-380.748
219.87	-372.934
220.24	-373.358
220.62	-372.833
220.99	-369.994
221.37	-368.485
221.74	-365.457
222.11	-355.599
222.49	-348.762
222.86	-339.713
223.24	-327.908
223.61	-319.794
223.99	-317.018
224.36	-307.57
224.74	-296.613
225.11	-287.321
225.49	-278.025
225.86	-266.86
226.24	-261.538
226.61	-250.476
226.99	-240.098
227.36	-229.25
227.73	-212.242
228.11	-195.689
228.48	-176.041
228.86	-153.664
229.23	-129.563
229.61	-108.599
229.98	-91.802
230.36	-78.293
230.73	-69.391
231.1	-63.073
231.48	-58.743
231.85	-55.191
232.23	-52.179
232.6	-50.087
232.97	-49.183
233.35	-49.292
233.72	-50.518
234.1	-52.279
234.47	-53.617
234.85	-53.737
235.22	-52.803
235.59	-51.16
235.97	-49.479
236.34	-47.761
236.72	-46.122
237.09	-44.548
237.46	-42.512
237.84	-40.651
238.21	-38.744
238.58	-37.579
238.96	-36.635
239.33	-35.796
239.71	-34.78
240.08	-33.506
240.45	-31.923
240.83	-29.854
241.2	-27.315
241.57	-24.788
241.95	-21.737
242.32	-18.705
242.7	-15.636
243.07	-12.877
243.44	-10.481
243.82	-8.59
244.19	-7.313
244.56	-6.435
244.94	-5.911
245.31	-5.614
245.68	-5.423
246.06	-5.311
246.43	-5.221
246.8	-4.987
247.18	-4.571
247.55	-3.959
247.92	-3.147
248.3	-2.268
248.67	-1.511
249.04	-0.921
249.42	-0.512
249.79	-0.239
250.16	-0.027
250.54	0.087
250.91	0.073
251.28	-0.082
251.65	-0.406
252.03	-0.932
252.4	-1.574
252.77	-2.257
253.15	-2.784
253.52	-3.124
253.89	-3.331
254.27	-3.583
254.64	-3.84
255.01	-3.985
255.38	-4.095
255.76	-4.177
256.13	-4.35
256.5	-4.702
256.87	-5.169
257.25	-5.817
257.62	-6.458
257.99	-6.899
258.37	-6.945
258.74	-6.625
259.11	-6.048
259.48	-5.196
259.86	-4.194
260.23	-3.004
260.6	-1.849
260.97	-0.824
261.35	-0.067
261.72	0.472
262.09	0.786
262.46	0.948
262.84	1.043
263.21	1.081
263.58	1.073
263.95	1.014
264.32	0.852
264.7	0.54
265.07	-0.009
265.44	-0.687
265.81	-1.472
266.19	-2.105
266.56	-2.513
266.93	-2.66
267.3	-2.664
267.67	-2.56
268.05	-2.393
268.42	-2.223
268.79	-2.026
269.16	-1.793
269.53	-1.613
269.9	-1.435
270.28	-1.315
270.65	-1.203
271.02	-1.151
271.39	-1.094
271.76	-1.043
272.14	-0.964
272.51	-0.85
272.88	-0.703
273.25	-0.555
273.62	-0.39
273.99	-0.255
274.37	-0.126
274.74	-0.019
275.11	0.033
275.48	0.041
275.85	0.001
276.22	-0.103
276.59	-0.198
276.97	-0.346
277.34	-0.498
277.71	-0.659
278.08	-0.8
278.45	-0.953
278.82	-1.056
279.19	-1.156
279.57	-1.226
279.94	-1.272
280.31	-1.256
280.68	-1.327
281.05	-1.344
281.42	-1.351
281.79	-1.335
282.16	-1.271
282.53	-1.141
282.91	-1.008
283.28	-0.86
283.65	-0.706
284.02	-0.567
284.39	-0.479
284.76	-0.353
285.13	-0.253
285.5	-0.147
285.87	-0.003
286.24	0.144
286.61	0.287
286.99	0.406
287.36	0.549
287.73	0.634
288.1	0.68
288.47	0.726
288.84	0.735
289.21	0.735
289.58	0.72
289.95	0.674
290.32	0.59
290.69	0.502
291.06	0.397
291.43	0.328
291.8	0.292
292.17	0.284
292.54	0.265
292.91	0.246
293.28	0.226
293.65	0.195
294.02	0.152
294.4	0.104
294.77	0.015
295.14	-0.036
295.51	-0.111
295.88	-0.179
296.25	-0.211
296.62	-0.189
296.99	-0.107
297.36	0.04
297.73	0.234
298.1	0.458
298.47	0.678
298.84	0.878
299.21	0.995
299.58	1.046
299.95	1.069
300.32	1.06
300.69	1.047
301.06	0.995
301.42	0.905
301.79	0.781
302.16	0.578
302.53	0.341
302.9	0.095
303.27	-0.093
303.64	-0.259
304.01	-0.357
304.38	-0.388
304.75	-0.442
305.12	-0.446
305.49	-0.453
305.86	-0.5
306.23	-0.509
306.6	-0.53
306.97	-0.581
307.34	-0.672
307.71	-0.69
308.08	-0.746
308.45	-0.836
308.81	-0.875
309.18	-0.911
309.55	-0.943
309.92	-0.885
310.29	-0.827
310.66	-0.753
311.03	-0.593
311.4	-0.444
311.77	-0.331
312.14	-0.192
312.51	-0.073
312.87	-0.026
313.24	-0.002
313.61	-0.026
313.98	-0.127
314.35	-0.285
314.72	-0.466
315.09	-0.712
315.46	-0.968
315.83	-1.215
316.19	-1.524
316.56	-1.86
316.93	-2.143
317.3	-2.423
317.67	-2.667
318.04	-2.793
318.41	-2.869
318.77	-2.91
319.14	-2.972
319.51	-3.056
319.88	-3.172
320.25	-3.259
320.62	-3.345
320.99	-3.46
321.35	-3.593
321.72	-3.72
322.09	-3.918
322.46	-4.072
322.83	-4.233
323.19	-4.391
323.56	-4.462
323.93	-4.512
324.3	-4.535
324.67	-4.508
325.04	-4.437
325.4	-4.352
325.77	-4.244
326.14	-4.145
326.51	-4.073
326.88	-3.995
327.24	-3.89
327.61	-3.821
327.98	-3.812
328.35	-3.814
328.71	-3.833
329.08	-3.917
329.45	-4.002
329.82	-4.073
330.19	-4.152
330.55	-4.232
330.92	-4.31
331.29	-4.404
331.66	-4.516
332.02	-4.591
332.39	-4.661
332.76	-4.723
333.13	-4.764
333.49	-4.757
333.86	-4.748
334.23	-4.724
334.6	-4.653
334.96	-4.639
335.33	-4.618
335.7	-4.569
336.07	-4.532
336.43	-4.48
336.8	-4.432
337.17	-4.396
337.53	-4.352
337.9	-4.321
338.27	-4.287
338.64	-4.28
339	-4.247
339.37	-4.231
339.74	-4.223
340.1	-4.193
340.47	-4.229
340.84	-4.263
341.2	-4.267
341.57	-4.295
341.94	-4.308
342.3	-4.32
342.67	-4.309
343.04	-4.306
343.4	-4.315
343.77	-4.337
344.14	-4.363
344.5	-4.353
344.87	-4.329
345.24	-4.292
345.6	-4.25
345.97	-4.21
346.34	-4.168
346.7	-4.151
347.07	-4.121
347.44	-4.073
347.8	-4.057
348.17	-4.025
348.54	-4.023
348.9	-4.053
349.27	-4.125
349.63	-4.178
350	-4.227
350.37	-4.256
350.73	-4.307
351.1	-4.351
351.46	-4.376
351.83	-4.379
352.2	-4.41
352.56	-4.386
352.93	-4.397
353.29	-4.356
353.66	-4.338
354.03	-4.345
354.39	-4.338
354.76	-4.329
355.12	-4.308
355.49	-4.3
355.86	-4.266
356.22	-4.211
356.59	-4.16
356.95	-4.042
357.32	-3.964
357.68	-3.875
358.05	-3.771
358.41	-3.672
358.78	-3.57
359.15	-3.477
359.51	-3.414
359.88	-3.361
360.24	-3.327
360.61	-3.302
360.97	-3.252
361.34	-3.159
361.7	-3.092
362.07	-3.007
362.43	-2.889
362.8	-2.75
363.16	-2.648
363.53	-2.557
363.89	-2.484
364.26	-2.434
364.62	-2.381
364.99	-2.363
365.35	-2.376
365.72	-2.374
366.08	-2.38
366.45	-2.43
366.81	-2.506
367.18	-2.568
367.54	-2.592
367.91	-2.581
368.27	-2.537
368.64	-2.511
369	-2.467
369.37	-2.42
369.73	-2.372
370.1	-2.333
370.46	-2.297
370.83	-2.232
371.19	-2.156
371.55	-2.082
371.92	-1.988
372.28	-1.888
372.65	-1.744
373.01	-1.613
373.38	-1.505
373.74	-1.389
374.11	-1.272
374.47	-1.143
374.83	-1.026
375.2	-0.927
375.56	-0.824
375.93	-0.726
376.29	-0.595
376.65	-0.479
377.02	-0.344
377.38	-0.173
377.75	-0.012
378.11	0.202
378.47	0.411
378.84	0.601
379.2	0.804
379.57	0.988
379.93	1.16
380.29	1.305
380.66	1.453
381.02	1.598
381.38	1.763
381.75	1.931
382.11	2.069
382.48	2.179
382.84	2.327
383.2	2.489
383.57	2.664
383.93	2.851
384.29	3.077
384.66	3.297
385.02	3.515
385.38	3.741
385.75	3.978
386.11	4.221
386.47	4.483
386.84	4.725
387.2	4.97
387.56	5.213
387.93	5.447
388.29	5.682
388.65	5.916
389.02	6.16
389.38	6.38
389.74	6.6
390.1	6.82
390.47	7.067
390.83	7.318
391.19	7.566
391.56	7.822
391.92	8.114
392.28	8.431
392.64	8.761
393.01	9.063
393.37	9.358
393.73	9.644
394.09	9.931
394.46	10.216
394.82	10.515
395.18	10.826
395.55	11.147
395.91	11.436
396.27	11.699
396.63	11.964
396.99	12.239
397.36	12.522
397.72	12.799
398.08	13.07
398.44	13.335
398.81	13.618
399.17	13.89
399.53	14.181
399.89	14.49
400.25	14.798
400.62	15.105
400.98	15.422
401.34	15.722
401.7	16.031
402.06	16.343
402.43	16.668
402.79	16.971
403.15	17.276
403.51	17.574
403.87	17.886
404.24	18.214
404.6	18.547
404.96	18.89
405.32	19.246
405.68	19.579
406.04	19.915
406.41	20.226
406.77	20.537
407.13	20.851
407.49	21.16
407.85	21.468
408.21	21.764
408.57	22.048
408.94	22.324
409.3	22.594
409.66	22.884
410.02	23.16
410.38	23.471
410.74	23.807
411.1	24.136
411.46	24.45
411.83	24.748
412.19	25.042
412.55	25.334
412.91	25.623
413.27	25.893
413.63	26.167
413.99	26.454
414.35	26.727
414.71	26.981
415.07	27.248
415.43	27.527
415.8	27.804
416.16	28.092
416.52	28.358
416.88	28.641
417.24	28.934
417.6	29.215
417.96	29.487
418.32	29.748
418.68	30.017
419.04	30.273
419.4	30.532
419.76	30.774
420.12	31
420.48	31.232
420.84	31.452
421.2	31.655
421.56	31.849
421.92	32.028
422.28	32.198
422.64	32.36
423	32.526
423.36	32.676
423.72	32.835
424.08	32.981
424.44	33.127
424.8	33.254
425.16	33.401
425.52	33.556
425.88	33.714
426.24	33.873
426.6	34.026
426.96	34.169
427.32	34.308
427.68	34.435
428.04	34.567
428.4	34.698
428.76	34.85
429.12	35
429.48	35.145
429.84	35.298
430.2	35.458
430.56	35.619
430.92	35.76
431.28	35.896
431.64	36.024
432	36.153
432.35	36.288
432.71	36.417
433.07	36.536
433.43	36.663
433.79	36.788
434.15	36.905
434.51	37.023
434.87	37.142
435.23	37.275
435.59	37.399
435.95	37.515
436.3	37.633
436.66	37.756
437.02	37.88
437.38	37.992
437.74	38.11
438.1	38.244
438.46	38.368
438.82	38.498
439.17	38.606
439.53	38.688
439.89	38.797
440.25	38.87
440.61	38.929
440.97	38.99
441.33	39.061
441.68	39.132
442.04	39.188
442.4	39.244
442.76	39.29
443.12	39.351
443.48	39.434
443.83	39.496
444.19	39.545
444.55	39.62
444.91	39.688
445.27	39.744
445.62	39.804
445.98	39.852
446.34	39.891
446.7	39.916
447.06	39.923
447.41	39.917
447.77	39.929
448.13	39.972
448.49	40
448.84	40.046
449.2	40.103
449.56	40.145
449.92	40.207
450.28	40.277
450.63	40.362
450.99	40.465
451.35	40.571
451.71	40.664
452.06	40.756
452.42	40.835
452.78	40.905
453.14	40.952
453.49	41.015
453.85	41.049
454.21	41.094
454.56	41.124
454.92	41.125
455.28	41.142
455.64	41.162
455.99	41.179
456.35	41.218
456.71	41.253
457.06	41.295
457.42	41.325
457.78	41.385
458.13	41.423
458.49	41.473
458.85	41.523
459.2	41.554
459.56	41.571
459.92	41.578
460.27	41.557
460.63	41.516
460.99	41.497
461.34	41.518
461.7	41.512
462.06	41.526
462.41	41.539
462.77	41.571
463.13	41.602
463.48	41.644
463.84	41.699
464.2	41.775
464.55	41.877
464.91	41.979
465.26	42.07
465.62	42.143
465.98	42.206
466.33	42.27
466.69	42.316
467.04	42.357
467.4	42.386
467.76	42.408
468.11	42.415
468.47	42.44
468.82	42.475
469.18	42.502
469.53	42.574
469.89	42.637
470.25	42.682
470.6	42.727
470.96	42.791
471.31	42.833
471.67	42.886
472.02	42.95
472.38	42.992
472.74	43.039
473.09	43.07
473.45	43.097
473.8	43.12
474.16	43.158
474.51	43.191
474.87	43.218
475.22	43.267
475.58	43.297
475.93	43.328
476.29	43.361
476.64	43.373
477	43.379
477.35	43.376
477.71	43.375
478.06	43.36
478.42	43.336
478.77	43.311
479.13	43.293
479.48	43.283
479.84	43.277
480.19	43.275
480.55	43.271
480.9	43.293
481.25	43.303
481.61	43.31
481.96	43.309
482.32	43.32
482.67	43.316
483.03	43.315
483.38	43.312
483.74	43.306
484.09	43.414
484.44	44.408
484.8	46.806
485.15	49.41
485.51	50.772
485.86	50.951
486.22	50.716
486.57	50.515
486.92	50.391
487.28	50.303
487.63	50.255
487.99	50.274
488.34	50.011
488.69	48.825
489.05	47.092
489.4	45.841
489.75	45.359
490.11	45.297
490.46	45.316
490.82	45.341
491.17	45.381
491.52	45.41
491.88	45.371
492.23	45.181
492.58	44.977
492.94	44.837
493.29	44.69
493.64	44.638
494	44.638
494.35	44.673
494.7	44.711
495.06	44.751
495.41	44.798
495.76	44.852
496.12	44.866
496.47	44.658
496.82	44.319
497.17	44.184
497.53	44.182
497.88	44.208
498.23	44.216
498.59	44.223
498.94	44.223
499.29	44.23
499.64	44.238
500	44.24
500.35	44.245
500.7	44.253
501.05	44.268
501.41	44.304
501.76	44.34
502.11	44.387
502.46	44.43
502.82	44.477
503.17	44.515
503.52	44.557
503.87	44.611
504.23	44.648
504.58	44.661
504.93	44.664
505.28	44.672
505.63	44.697
505.99	44.701
506.34	44.718
506.69	44.731
507.04	44.737
507.39	44.741
507.75	44.732
508.1	44.728
508.45	44.746
508.8	44.758
509.15	44.746
509.5	44.726
509.86	44.726
510.21	44.702
510.56	44.679
510.91	44.674
511.26	44.667
511.61	44.67
511.97	44.679
512.32	44.687
512.67	44.71
513.02	44.723
513.37	44.745
513.72	44.745
514.07	44.765
514.42	44.788
514.78	44.812
515.13	44.841
515.48	44.873
515.83	44.897
516.18	44.916
516.53	44.931
516.88	44.969
517.23	44.989
517.58	45.021
517.93	45.043
518.28	45.046
518.64	45.037
518.99	45.005
519.34	44.962
519.69	44.936
520.04	44.917
520.39	44.898
520.74	44.869
521.09	44.856
521.44	44.847
521.79	44.853
522.14	44.865
522.49	44.879
522.84	44.901
523.19	44.937
523.54	44.966
523.89	44.993
524.24	45.013
524.59	45.052
524.94	45.09
525.29	45.112
525.64	45.1
525.99	45.077
526.34	45.055
526.69	45.051
527.04	45.047
527.39	45.043
527.74	45.028
528.09	45.032
528.44	45.033
528.79	45.073
529.14	45.449
529.49	46.709
529.84	48.513
530.19	49.858
530.54	50.43
530.89	50.512
531.24	50.46
531.59	50.425
531.93	50.412
532.28	50.434
532.63	50.499
532.98	50.414
533.33	49.549
533.68	47.89
534.03	46.393
534.38	45.732
534.73	45.69
535.08	45.739
535.43	45.746
535.77	45.752
536.12	45.759
536.47	45.775
536.82	45.795
537.17	45.8
537.52	45.802
537.87	45.748
538.22	45.563
538.56	45.33
538.91	45.22
539.26	45.211
539.61	45.219
539.96	45.233
540.31	45.249
540.65	45.252
541	45.282
541.35	45.28
541.7	45.306
542.05	45.437
542.4	45.883
542.74	46.415
543.09	46.666
543.44	46.693
543.79	46.67
544.14	46.639
544.48	46.615
544.83	46.603
545.18	46.603
545.53	46.614
545.87	46.569
546.22	46.272
546.57	45.82
546.92	45.522
547.26	45.441
547.61	45.417
547.96	45.394
548.31	45.398
548.65	45.396
549	45.423
549.35	45.434
549.7	45.466
550.04	45.51
550.39	45.547
550.74	45.592
551.09	45.632
551.43	45.691
551.78	45.772
552.13	45.836
552.47	45.914
552.82	45.962
553.17	46.001
553.51	46.007
553.86	45.996
554.21	45.978
554.55	45.965
554.9	45.949
555.25	45.945
555.59	45.945
555.94	45.949
556.29	45.941
556.63	45.965
556.98	46.002
557.33	46.035
557.67	46.079
558.02	46.123
558.37	46.177
558.71	46.217
559.06	46.247
559.4	46.276
559.75	46.294
560.1	46.328
560.44	46.331
560.79	46.342
561.14	46.36
561.48	46.358
561.83	46.36
562.17	46.344
562.52	46.337
562.86	46.334
563.21	46.337
563.56	46.331
563.9	46.325
564.25	46.325
564.59	46.33
564.94	46.336
565.28	46.354
565.63	46.364
565.97	46.389
566.32	46.39
566.67	46.367
567.01	46.315
567.36	46.265
567.7	46.223
568.05	46.196
568.39	46.179
568.74	46.157
569.08	46.163
569.43	46.167
569.77	46.16
570.12	46.187
570.46	46.218
570.81	46.259
571.15	46.314
571.5	46.355
571.84	46.383
572.19	46.383
572.53	46.374
572.87	46.344
573.22	46.31
573.56	46.293
573.91	46.269
574.25	46.255
574.6	46.245
574.94	46.242
575.29	46.236
575.63	46.228
575.97	46.235
576.32	46.246
576.66	46.261
577.01	46.293
577.35	46.318
577.7	46.347
578.04	46.38
578.38	46.404
578.73	46.435
579.07	46.464
579.41	46.505
579.76	46.555
580.1	46.621
580.45	46.671
580.79	46.732
581.13	46.779
581.48	46.813
581.82	46.847
582.16	46.875
582.51	46.896
582.85	46.937
583.19	46.964
583.54	46.987
583.88	46.997
584.22	47.01
584.57	47.014
584.91	47.034
585.25	47.053
585.6	47.057
585.94	47.081
586.28	47.094
586.63	47.099
586.97	47.108
587.31	47.115
587.65	47.12
588	47.131
588.34	47.119
588.68	47.106
589.03	47.095
589.37	47.086
589.71	47.087
590.05	47.069
590.4	47.035
590.74	47.014
591.08	46.983
591.42	46.964
591.77	46.952
592.11	46.946
592.45	46.951
592.79	46.946
593.13	46.942
593.48	46.95
593.82	46.964
594.16	46.988
594.5	46.999
594.85	47.006
595.19	47
595.53	46.982
595.87	46.977
596.21	46.966
596.55	46.968
596.9	46.956
597.24	46.913
597.58	46.881
597.92	46.823
598.26	46.776
598.6	46.728
598.95	46.703
599.29	46.695
599.63	46.699
599.97	46.692
600.31	46.682
600.65	46.7
600.99	46.718
601.34	46.751
601.68	46.794
602.02	46.847
602.36	46.911
602.7	46.967
603.04	47.001
603.38	47.012
603.72	46.994
604.06	46.991
604.4	46.951
604.74	46.934
605.09	46.871
605.43	46.804
605.77	46.719
606.11	46.649
606.45	46.584
606.79	46.552
607.13	46.525
607.47	46.53
607.81	46.523
608.15	46.539
608.49	46.537
608.83	46.57
609.17	46.634
609.51	46.697
609.85	46.754
610.19	46.807
610.53	46.816
610.87	46.809
611.21	46.786
611.55	46.782
611.89	46.773
612.23	46.771
612.57	46.756
612.91	46.744
613.25	46.76
613.59	46.775
613.93	46.783
614.27	46.817
614.61	46.868
614.95	46.913
615.29	46.95
615.63	46.972
615.97	46.997
616.31	47.012
616.64	47.02
616.98	47.002
617.32	47.011
617.66	47.034
618	47.045
618.34	47.029
618.68	47.028
619.02	46.996
619.36	46.979
619.7	46.963
620.03	46.966
620.37	46.971
620.71	46.969
621.05	46.963
621.39	46.955
621.73	46.943
622.07	46.927
622.41	46.934
622.74	46.951
623.08	46.969
623.42	46.974
623.76	46.965
624.1	46.941
624.44	46.929
624.77	46.909
625.11	46.916
625.45	46.902
625.79	46.924
626.13	46.918
626.46	46.908
626.8	46.901
627.14	46.896
627.48	46.879
627.82	46.857
628.15	46.853
628.49	46.85
628.83	46.807
629.17	46.802
629.5	46.781
629.84	46.778
630.18	46.777
630.52	46.76
630.85	46.749
631.19	46.744
631.53	46.757
631.87	46.761
632.2	46.767
632.54	46.788
632.88	46.784
633.22	46.787
633.55	46.768
633.89	46.748
634.23	46.745
634.56	46.738
634.9	46.733
635.24	46.729
635.57	46.715
635.91	46.718
636.25	46.709
636.58	46.721
636.92	46.727
637.26	46.732
637.59	46.732
637.93	46.724
638.27	46.743
638.6	46.758
638.94	46.766
639.28	46.774
639.61	46.76
639.95	46.773
640.28	46.765
640.62	46.756
640.96	46.756
641.29	46.769
641.63	46.783
641.96	46.755
642.3	46.743
642.64	46.741
642.97	46.738
643.31	46.735
643.64	46.718
643.98	46.715
644.32	46.69
644.65	46.665
644.99	46.623
645.32	46.602
645.66	46.595
645.99	46.562
646.33	46.513
646.66	46.486
647	46.467
647.33	46.452
647.67	46.425
648	46.417
648.34	46.402
648.68	46.409
649.01	46.376
649.35	46.337
649.68	46.331
650.01	46.33
650.35	46.313
650.68	46.304
651.02	46.28
651.35	46.278
651.69	46.258
652.02	46.236
652.36	46.228
652.69	46.224
653.03	46.222
653.36	46.224
653.7	46.208
654.03	46.194
654.36	46.141
654.7	46.124
655.03	46.07
655.37	46.053
655.7	46.047
656.04	46.006
656.37	45.989
656.7	45.966
657.04	45.928
657.37	45.896
657.71	45.883
658.04	45.877
658.37	45.854
658.71	45.835
659.04	45.812
659.37	45.783
659.71	45.797
660.04	45.777
660.37	45.748
660.71	45.716
661.04	45.724
661.37	45.7
661.71	45.694
662.04	45.669
662.37	45.663
662.71	45.637
663.04	45.627
663.37	45.578
663.71	45.533
664.04	45.501
664.37	45.453
664.71	45.369
665.04	45.318
665.37	45.263
665.7	45.214
666.04	45.142
666.37	45.092
666.7	45.044
667.03	45.008
667.37	44.95
667.7	44.943
668.03	44.912
668.36	44.904
668.7	44.87
669.03	44.802
669.36	44.765
669.69	44.729
670.03	44.695
670.36	44.648
670.69	44.609
671.02	44.595
671.35	44.508
671.69	44.485
672.02	44.427
672.35	44.378
672.68	44.368
673.01	44.308
673.35	44.265
673.68	44.216
674.01	44.164
674.34	44.088
674.67	44.016
675	43.955
675.33	43.891
675.67	43.847
676	43.752
676.33	43.674
676.66	43.63
676.99	43.583
677.32	43.524
677.65	43.455
677.98	43.394
678.31	43.331
678.65	43.292
678.98	43.212
679.31	43.141
679.64	43.109
679.97	43.061
680.3	43.021
680.63	42.955
680.96	42.925
681.29	42.875
681.62	42.845
681.95	42.808
682.28	42.772
682.61	42.737
682.94	42.669
683.27	42.605
683.6	42.53
683.93	42.453
684.27	42.386
684.6	42.287
684.93	42.187
685.26	42.079
685.59	41.961
685.92	41.846
686.25	41.711
686.57	41.622
686.9	41.5
687.23	41.386
687.56	41.223
687.89	41.09
688.22	40.959
688.55	40.849
688.88	40.723
689.21	40.606
689.54	40.466
689.87	40.35
690.2	40.218
690.53	40.112
690.86	40.014
691.19	39.918
691.52	39.795
691.85	39.656
692.17	39.537
692.5	39.437
692.83	39.322
693.16	39.204
693.49	39.063
693.82	38.897
694.15	38.775
694.48	38.616
694.81	38.487
695.13	38.371
695.46	38.262
695.79	38.123
696.12	37.976
696.45	37.815
696.78	37.659
697.1	37.526
697.43	37.421
697.76	37.272
698.09	37.174
698.42	37.084
698.75	36.95
699.07	36.88
699.4	36.797
699.73	36.705
700.06	36.718
700.38	36.707
700.71	36.676
701.04	36.615
701.37	36.55
701.7	36.456
702.02	36.334
702.35	36.212
702.68	36.037
703.01	35.848
703.33	35.66
703.66	35.389
703.99	35.085
704.32	34.781
704.64	34.498
704.97	34.196
705.3	33.889
705.62	33.637
705.95	33.411
706.28	33.179
706.6	32.982
706.93	32.811
707.26	32.584
707.58	32.391
707.91	32.225
708.24	32.022
708.56	31.897
708.89	31.775
709.22	31.627
709.54	31.497
709.87	31.397
710.2	31.276
710.52	31.118
710.85	31
711.18	30.857
711.5	30.728
711.83	30.594
712.15	30.4
712.48	30.22
712.81	30.026
713.13	29.856
713.46	29.684
713.78	29.526
714.11	29.394
714.44	29.275
714.76	29.143
715.09	28.975
715.41	28.828
715.74	28.663
716.06	28.505
716.39	28.402
716.71	28.247
717.04	28.144
717.37	28.065
717.69	27.969
718.02	27.84
718.34	27.721
718.67	27.569
718.99	27.416
719.32	27.261
719.64	27.081
719.97	26.836
720.29	26.612
720.62	26.351
720.94	26.024
721.27	25.656
721.59	25.343
721.91	25.002
722.24	24.727
722.56	24.44
722.89	24.191
723.21	23.931
723.54	23.717
723.86	23.465
724.19	23.17
724.51	22.933
724.83	22.73
725.16	22.475
725.48	22.279
725.81	22.079
726.13	21.841
726.45	21.673
726.78	21.542
727.1	21.387
727.43	21.332
727.75	21.224
728.07	21.151
728.4	21.062
728.72	20.984
729.04	20.88
729.37	20.791
729.69	20.786
730.01	20.711
730.34	20.694
730.66	20.645
730.98	20.546
731.31	20.495
731.63	20.431
731.95	20.379
732.28	20.339
732.6	20.277
732.92	20.167
733.25	20.102
733.57	20.007
733.89	19.892
734.21	19.812
734.54	19.735
734.86	19.689
735.18	19.591
735.5	19.463
735.83	19.313
736.15	19.185
736.47	19.034
736.79	18.821
737.12	18.65
737.44	18.432
737.76	18.198
738.08	17.936
738.4	17.633
738.73	17.331
739.05	17.027
739.37	16.858
739.69	16.674
740.01	16.504
740.34	16.302
740.66	16.146
740.98	16.001
741.3	15.863
741.62	15.786
741.94	15.7
742.27	15.59
742.59	15.5
742.91	15.316
743.23	15.134
743.55	14.996
743.87	14.89
744.19	14.664
744.51	14.481
744.84	14.309
745.16	14.063
745.48	13.896
745.8	13.692
746.12	13.486
746.44	13.206
746.76	13.035
747.08	12.903
747.4	12.726
747.72	12.554
748.04	12.364
748.36	12.15
748.68	11.999
749	11.801
749.33	11.709
749.65	11.598
749.97	11.557
750.29	11.486
750.61	11.386
750.93	11.323
751.25	11.295
751.57	11.201
751.89	11.132
752.21	11.111
752.53	10.957
752.85	10.877
753.17	10.797
753.49	10.691
753.8	10.582
754.12	10.441
754.44	10.237
754.76	10.153
755.08	10.03
755.4	9.924
755.72	9.823
756.04	9.778
756.36	9.663
756.68	9.513
757	9.419
757.32	9.282
757.64	9.162
757.96	9.082
758.27	8.931
758.59	8.894
758.91	8.834
759.23	8.685
759.55	8.62
759.87	8.539
760.19	8.533
760.51	8.426
760.82	8.4
761.14	8.35
761.46	8.363
761.78	8.342
762.1	8.309
762.42	8.314
762.73	8.365
763.05	8.454
763.37	8.534
763.69	8.576
764.01	8.827
764.32	9.054
764.64	9.478
764.96	10.056
765.28	10.817
765.6	11.508
765.91	12.163
766.23	12.62
766.55	12.938
766.87	13.163
767.18	13.363
767.5	13.435
767.82	13.439
768.14	13.333
768.45	13.07
768.77	12.617
769.09	12.085
769.4	11.436
769.72	10.779
770.04	10.158
770.36	9.591
770.67	9.068
770.99	8.539
771.31	8.082
771.62	7.688
771.94	7.318
772.26	6.919
772.57	6.553
772.89	6.146
773.21	5.81
773.52	5.512
773.84	5.249
774.15	4.887
774.47	4.635
774.79	4.481
775.1	4.206
775.42	3.86
775.74	3.664
776.05	3.487
776.37	3.284
776.68	3.108
777	2.897
777.31	2.723
777.63	2.544
777.95	2.468
778.26	2.225
778.58	2.028
778.89	2.076
779.21	2.038
779.52	1.975
779.84	2.056
780.15	2.033
780.47	2.034
780.79	2.054
781.1	2.152
781.42	1.996
781.73	1.941
782.05	1.909
782.36	1.751
782.68	1.549
782.99	1.449
783.3	1.233
783.62	1.086
783.93	1.027
784.25	0.784
784.56	0.554
784.88	0.546
785.19	0.511
785.51	0.398
785.82	0.142
786.14	-0.06
786.45	-0.216
786.76	-0.312
787.08	-0.419
787.39	-0.584
787.71	-0.644
788.02	-0.797
788.33	-0.919
788.65	-0.998
788.96	-1.105
789.28	-0.974
789.59	-0.763
789.9	-0.423
790.22	-0.128
790.53	0.288
790.84	0.615
791.16	1.003
791.47	1.335
791.78	1.574
792.1	1.706
792.41	1.875
792.72	1.93
793.04	1.884
793.35	1.589
793.66	1.31
793.98	0.961
794.29	0.618
794.6	0.322
794.91	0.082
795.23	-0.365
795.54	-0.73
795.85	-1.022
796.17	-1.264
796.48	-1.376
796.79	-1.392
797.1	-1.387
797.42	-1.309
797.73	-1.235
798.04	-1.248
798.35	-1.128
798.66	-0.985
798.98	-0.915
799.29	-0.831
799.6	-0.793
799.91	-0.772
800.22	-0.767
800.54	-0.9
800.85	-1.074
801.16	-1.201
801.47	-1.345
801.78	-1.612
802.09	-1.745
802.41	-1.905
802.72	-2.099
803.03	-2.294
803.34	-2.547
803.65	-2.811
803.96	-2.983
804.27	-3.201
804.59	-3.36
804.9	-3.522
805.21	-3.762
805.52	-4.019
805.83	-4.202
806.14	-4.388
806.45	-4.477
806.76	-4.572
807.07	-4.675
807.38	-4.7
807.69	-4.745
808	-4.895
808.31	-4.987
808.63	-4.986
808.94	-5
809.25	-4.955
809.56	-4.979
809.87	-5.11
810.18	-5.223
810.49	-5.293
810.8	-5.467
811.11	-5.641
811.42	-5.919
811.73	-6.197
812.04	-6.407
812.35	-6.694
812.66	-7.056
812.97	-7.281
813.28	-7.5
813.58	-7.793
813.89	-8.122
814.2	-8.177
814.51	-8.411
814.82	-8.523
815.13	-8.683
815.44	-8.843
815.75	-8.995
816.06	-9.021
816.37	-9.088
816.68	-9.162
816.99	-9.177
817.3	-9.293
817.6	-9.434
817.91	-9.464
818.22	-9.309
818.53	-9.161
818.84	-8.965
819.15	-8.7
819.46	-8.475
819.76	-8.284
820.07	-7.895
820.38	-7.455
820.69	-6.803
821	-6.194
821.31	-5.185
821.61	-4.155
821.92	-2.883
822.23	-1.51
822.54	-0.044
822.85	1.665
823.15	3.785
823.46	6.287
823.77	9.128
824.08	11.733
824.38	13.826
824.69	15.243
825	16.241
825.31	16.882
825.61	17.262
825.92	17.509
826.23	17.581
826.54	17.57
826.84	17.47
827.15	17.257
827.46	16.915
827.76	16.332
828.07	15.557
828.38	14.637
828.69	13.885
828.99	13.443
829.3	13.302
829.61	13.392
829.91	13.388
830.22	13.36
830.52	13.278
830.83	13.026
831.14	12.734
831.44	12.35
831.75	11.826
832.06	10.964
832.36	9.714
832.67	7.991
832.97	5.896
833.28	3.784
833.59	1.828
833.89	0.135
834.2	-1.077
834.5	-1.861
834.81	-2.009
835.12	-1.149
835.42	0.435
835.73	2.349
836.03	4.085
836.34	5.48
836.64	6.42
836.95	7.032
837.25	7.449
837.56	7.646
837.86	7.634
838.17	7.442
838.47	6.85
838.78	5.818
839.08	4.24
839.39	2.271
839.69	-0.033
840	-2.307
840.3	-4.604
840.61	-6.907
840.91	-9.069
841.22	-11.07
841.52	-12.479
841.83	-13.25
842.13	-13.416
842.43	-13.153
842.74	-12.828
843.04	-12.737
843.35	-12.703
843.65	-12.737
843.96	-12.968
844.26	-13.422
844.56	-13.989
844.87	-15.1
845.17	-16.775
845.47	-19.06
845.78	-21.653
846.08	-24.625
846.39	-27.265
846.69	-29.672
846.99	-31.965
847.3	-34.006
847.6	-35.817
847.9	-37.344
848.21	-39.228
848.51	-40.47
848.81	-41.545
849.11	-42.705
849.42	-43.507
849.72	-44.348
850.02	-45.276
850.33	-46.196
850.63	-46.506
850.93	-47.284
851.23	-48.162
851.54	-48.346
851.84	-49.076
852.14	-49.595
852.44	-49.91
852.75	-50.26
853.05	-50.604
853.35	-50.827
853.65	-50.892
853.96	-51.3
854.26	-51.17
854.56	-51.22
854.86	-51.605
855.16	-51.872
855.47	-52.127
855.77	-52.783
856.07	-53.298
856.37	-53.233
856.67	-53.596
856.97	-53.742
857.28	-54.277
857.58	-55.024
857.88	-55.618
858.18	-56.044
858.48	-56.286
858.78	-56.677
859.08	-56.424
859.38	-56.785
859.69	-57.162
859.99	-56.932
860.29	-56.913
860.59	-57.154
860.89	-57.143
861.19	-56.914
861.49	-56.98
861.79	-57.238
862.09	-57.203
862.39	-57.515
862.69	-57.64
862.99	-58.23
863.29	-58.732
863.59	-59.185
863.89	-59.271
864.19	-59.344
864.49	-59.931
864.79	-60.057
865.09	-60.045
865.39	-60.128
865.69	-60.176
865.99	-59.747
866.29	-58.991
866.59	-58.74
866.89	-58.383
867.19	-58.114
867.49	-57.833
867.79	-57.903
868.09	-57.46
868.39	-57.376
[truncated: 48 more rows]

## Sheet: Citmoc01
179.63	-43.75
180.007	-203.79
180.384	-360.02
180.761	811.3
181.138	359.51
181.515	283.48
181.892	657.99
182.269	564.46
182.646	-4927.6
183.023	-183.12
183.4	285.37
183.777	77.31
184.154	-61.96
184.53	-609.38
184.907	53.56
185.284	137.37
185.661	133.75
186.038	-109.41
186.414	-14.87
186.791	-14.37
187.168	-1.23
187.545	-6.56
187.921	-11.47
188.298	-7.43
188.675	-5.98
189.051	-5.74
189.428	-9.25
189.804	-5.78
190.181	-2.95
190.558	-6
190.934	-5.49
191.311	-6.56
191.687	-4.81
192.064	-1.5
192.44	-4.05
192.817	-5.58
193.193	-4.85
193.569	-2.01
193.946	-3.29
194.322	-4.68
194.698	-5.08
195.075	-3.84
195.451	-3.97
195.827	-2.67
196.203	-3.68
196.58	-3.25
196.956	-1.24
197.332	1.29
197.708	0.19
198.084	-0.81
198.461	-0.03
198.837	2.63
199.213	4.5
199.589	2.63
199.965	4.13
200.341	2.35
200.717	2.45
201.093	2.22
201.469	-0.18
201.845	0.04
202.221	0.98
202.597	0.82
202.972	-0.09
203.348	-3.29
203.724	-1.1
204.1	-4.21
204.476	-3.56
204.852	-3.16
205.227	-4.37
205.603	-3.34
205.979	-3.25
206.355	-2.76
206.73	-2.06
207.106	-2.68
207.481	-2.63
207.857	-1.49
208.233	2.47
208.608	2.51
208.984	0.87
209.359	-0.77
209.735	-0.52
210.11	-0.88
210.486	-1.31
210.861	-1.46
211.237	-0.04
211.612	0.6
211.987	-0.93
212.363	-5.62
212.738	-5.74
213.113	-3.91
213.489	-1.26
213.864	-0.99
214.239	0.36
214.615	0.48
214.99	-0.76
215.365	-2.77
215.74	-0.25
216.115	-0.48
216.49	1.34
216.866	4.61
217.241	5.3
217.616	4.33
217.991	5.48
218.366	4.06
218.741	4.32
219.116	5.18
219.491	5.6
219.866	4.18
220.241	3.96
220.615	3.75
220.99	-0.05
221.365	-0.43
221.74	0.78
222.115	0.61
222.49	0.61
222.864	1.95
223.239	0.75
223.614	0.87
223.988	0.55
224.363	0.97
224.738	0.2
225.112	1.15
225.487	0.71
225.862	-0.64
226.236	-1.55
226.611	-1.1
226.985	-2.55
227.36	-1.54
227.734	-1.15
228.109	-1.53
228.483	-1.32
228.858	-0.87
229.232	-1.15
229.606	-0.93
229.981	-0.82
230.355	-1.11
230.729	-1.01
231.104	-0.88
231.478	-1.08
231.852	-1.08
232.226	-1.25
232.601	-1.53
232.975	-1.62
233.349	-1.7
233.723	-2.03
234.097	-1.94
234.471	-1.64
234.845	-1.64
235.219	-1.77
235.593	-1.81
235.967	-1.88
236.341	-1.84
236.715	-1.55
237.089	-1.36
237.463	-1.04
237.837	-0.88
238.211	-1.08
238.585	-1.13
238.958	-1.27
239.332	-1.31
239.706	-1.27
240.08	-1.19
240.453	-1.17
240.827	-1.31
241.201	-1.38
241.575	-1.47
241.948	-1.51
242.322	-1.43
242.695	-1.53
243.069	-1.57
243.442	-1.59
243.816	-1.67
244.189	-1.73
244.563	-1.74
244.936	-1.8
245.31	-1.86
245.683	-1.91
246.057	-1.99
246.43	-2.07
246.803	-2.1
247.177	-2.14
247.55	-2.17
247.923	-2.2
248.296	-2.23
248.67	-2.25
249.043	-2.23
249.416	-2.24
249.789	-2.26
250.162	-2.25
250.535	-2.24
250.909	-2.28
251.282	-2.29
251.655	-2.3
252.028	-2.29
252.401	-2.31
252.774	-2.34
253.147	-2.37
253.52	-2.36
253.892	-2.36
254.265	-2.37
254.638	-2.38
255.011	-2.35
255.384	-2.35
255.757	-2.4
256.129	-2.42
256.502	-2.42
256.875	-2.4
257.247	-2.41
257.62	-2.41
257.993	-2.45
258.365	-2.45
258.738	-2.51
259.111	-2.53
259.483	-2.55
259.856	-2.54
260.228	-2.54
260.601	-2.56
260.973	-2.57
261.346	-2.56
261.718	-2.57
262.09	-2.55
262.463	-2.55
262.835	-2.55
263.207	-2.55
263.58	-2.56
263.952	-2.55
264.324	-2.57
264.696	-2.58
265.069	-2.59
265.441	-2.58
265.813	-2.6
266.185	-2.61
266.557	-2.57
266.929	-2.57
267.301	-2.54
267.673	-2.49
268.045	-2.47
268.417	-2.4
268.789	-2.39
269.161	-2.35
269.533	-2.36
269.905	-2.35
270.277	-2.35
270.649	-2.36
271.02	-2.34
271.392	-2.34
271.764	-2.33
272.136	-2.34
272.507	-2.32
272.879	-2.31
273.251	-2.3
273.622	-2.3
273.994	-2.29
274.366	-2.28
274.737	-2.3
275.109	-2.28
275.48	-2.28
275.852	-2.29
276.223	-2.26
276.595	-2.27
276.966	-2.24
277.338	-2.24
277.709	-2.2
278.08	-2.18
278.452	-2.15
278.823	-2.12
279.194	-2.1
279.565	-2.09
279.937	-2.08
280.308	-2.07
280.679	-2.07
281.05	-2.09
281.421	-2.1
281.792	-2.13
282.163	-2.14
282.535	-2.15
282.906	-2.15
283.277	-2.16
283.648	-2.14
284.018	-2.11
284.389	-2.11
284.76	-2.11
285.131	-2.09
285.502	-2.05
285.873	-2.02
286.244	-2.02
286.614	-2.01
286.985	-2
287.356	-1.98
287.727	-1.98
288.097	-1.99
288.468	-2
288.839	-1.99
289.209	-2.01
289.58	-2.02
289.95	-2.03
290.321	-2.03
290.691	-2.01
291.062	-2.02
291.432	-2.03
291.803	-2.04
292.173	-2.02
292.544	-2
292.914	-1.98
293.284	-1.96
293.655	-1.95
294.025	-1.93
294.395	-1.88
294.765	-1.87
295.135	-1.85
295.506	-1.86
295.876	-1.86
296.246	-1.88
296.616	-1.87
296.986	-1.89
297.356	-1.91
297.726	-1.92
298.096	-1.93
298.466	-1.95
298.836	-1.95
299.206	-1.96
299.576	-1.95
299.946	-1.93
300.316	-1.93
300.685	-1.95
301.055	-1.94
301.425	-1.93
301.795	-1.93
302.164	-1.95
302.534	-2
302.904	-2.03
303.273	-2.05
303.643	-2.04
304.013	-2.05
304.382	-2.06
304.752	-2.07
305.121	-2.09
305.491	-2.08
305.86	-2.12
306.23	-2.1
306.599	-2.08
306.968	-2.09
307.338	-2.07
307.707	-2.1
308.076	-2.11
308.446	-2.09
308.815	-2.07
309.184	-2.08
309.553	-2.07
309.922	-2.04
310.292	-2.04
310.661	-2.02
311.03	-2.03
311.399	-2.06
311.768	-2.06
312.137	-2.09
312.506	-2.13
312.875	-2.16
313.244	-2.2
313.613	-2.26
313.982	-2.31
314.35	-2.37
314.719	-2.43
315.088	-2.48
315.457	-2.54
315.826	-2.63
316.194	-2.72
316.563	-2.81
316.932	-2.94
317.3	-3.04
317.669	-3.11
318.037	-3.21
318.406	-3.23
318.775	-3.32
319.143	-3.42
319.512	-3.49
319.88	-3.57
320.248	-3.67
320.617	-3.73
320.985	-3.79
321.354	-3.81
321.722	-3.87
322.09	-3.9
322.458	-3.99
322.827	-4.02
323.195	-4.06
323.563	-4.14
323.931	-4.18
324.299	-4.22
324.667	-4.27
325.035	-4.29
325.404	-4.34
325.772	-4.36
326.14	-4.39
326.508	-4.45
326.875	-4.52
327.243	-4.58
327.611	-4.6
327.979	-4.62
328.347	-4.61
328.715	-4.63
329.083	-4.65
329.45	-4.69
329.818	-4.73
330.186	-4.8
330.553	-4.83
330.921	-4.84
331.289	-4.82
331.656	-4.82
332.024	-4.86
332.391	-4.89
332.759	-4.93
333.126	-4.98
333.494	-4.99
333.861	-5
334.229	-5.02
334.596	-5.03
334.963	-5.06
335.331	-5.1
335.698	-5.16
336.065	-5.2
336.432	-5.26
336.8	-5.31
337.167	-5.32
337.534	-5.34
337.901	-5.4
338.268	-5.41
338.635	-5.45
339.002	-5.47
339.369	-5.49
339.736	-5.5
340.103	-5.53
340.47	-5.54
340.837	-5.54
341.204	-5.61
341.571	-5.66
341.938	-5.68
342.304	-5.73
342.671	-5.75
343.038	-5.8
343.404	-5.83
343.771	-5.87
344.138	-5.89
344.504	-5.92
344.871	-5.96
345.238	-5.99
345.604	-6.03
345.971	-6.07
346.337	-6.1
346.704	-6.15
347.07	-6.18
347.436	-6.23
347.803	-6.27
348.169	-6.29
348.535	-6.34
348.902	-6.37
349.268	-6.39
349.634	-6.42
350	-6.43
350.366	-6.46
350.733	-6.48
351.099	-6.51
351.465	-6.56
351.831	-6.58
352.197	-6.62
352.563	-6.62
352.929	-6.64
353.295	-6.69
353.661	-6.71
354.027	-6.76
354.392	-6.77
354.758	-6.81
355.124	-6.81
355.49	-6.81
355.856	-6.82
356.221	-6.83
356.587	-6.86
356.953	-6.9
357.318	-6.9
357.684	-6.92
358.049	-6.92
358.415	-6.94
358.78	-6.94
359.146	-6.98
359.511	-7
359.877	-7.01
360.242	-7.03
360.608	-7.04
360.973	-7.03
361.338	-7.05
361.703	-7.06
362.069	-7.07
362.434	-7.08
362.799	-7.1
363.164	-7.09
363.529	-7.1
363.895	-7.11
364.26	-7.11
364.625	-7.1
364.99	-7.1
365.355	-7.1
365.72	-7.09
366.085	-7.09
366.449	-7.07
366.814	-7.05
367.179	-7.05
367.544	-7.02
367.909	-7.03
368.274	-6.99
368.638	-6.99
369.003	-6.96
369.368	-6.92
369.732	-6.9
370.097	-6.86
370.461	-6.85
370.826	-6.84
371.19	-6.79
371.555	-6.76
371.919	-6.7
372.284	-6.68
372.648	-6.66
373.013	-6.63
373.377	-6.6
373.741	-6.57
374.106	-6.55
374.47	-6.52
374.834	-6.47
375.198	-6.43
375.562	-6.39
375.927	-6.35
376.291	-6.31
376.655	-6.24
377.019	-6.19
377.383	-6.14
377.747	-6.1
378.111	-6.04
378.475	-6
378.839	-5.94
379.202	-5.91
379.566	-5.85
379.93	-5.81
380.294	-5.76
380.658	-5.71
381.021	-5.66
381.385	-5.62
381.749	-5.57
382.112	-5.5
382.476	-5.43
382.839	-5.41
383.203	-5.37
383.566	-5.32
383.93	-5.27
384.293	-5.23
384.657	-5.19
385.02	-5.13
385.384	-5.07
385.747	-5.02
386.11	-4.98
386.473	-4.93
386.837	-4.85
387.2	-4.8
387.563	-4.76
387.926	-4.69
388.289	-4.62
388.652	-4.58
389.015	-4.54
389.378	-4.49
389.741	-4.43
390.104	-4.39
390.467	-4.34
390.83	-4.29
391.193	-4.24
391.556	-4.18
391.919	-4.14
392.281	-4.09
392.644	-4.02
393.007	-3.97
393.37	-3.92
393.732	-3.84
394.095	-3.77
394.458	-3.72
394.82	-3.67
395.183	-3.61
395.545	-3.55
395.908	-3.49
396.27	-3.43
396.632	-3.38
396.995	-3.31
397.357	-3.25
397.719	-3.21
398.082	-3.14
398.444	-3.08
398.806	-3.02
399.168	-2.96
399.531	-2.89
399.893	-2.81
400.255	-2.74
400.617	-2.69
400.979	-2.62
401.341	-2.57
401.703	-2.5
402.065	-2.46
402.427	-2.39
402.789	-2.32
403.15	-2.25
403.512	-2.19
403.874	-2.16
404.236	-2.11
404.598	-2.05
404.959	-2
405.321	-1.94
405.683	-1.9
406.044	-1.85
406.406	-1.82
406.767	-1.78
407.129	-1.76
407.49	-1.72
407.852	-1.68
408.213	-1.64
408.574	-1.59
408.936	-1.56
409.297	-1.53
409.658	-1.48
410.02	-1.44
410.381	-1.42
410.742	-1.38
411.103	-1.33
411.464	-1.29
411.825	-1.25
412.186	-1.22
412.548	-1.19
412.909	-1.16
413.269	-1.14
413.63	-1.12
413.991	-1.09
414.352	-1.05
414.713	-1.04
415.074	-1.02
415.435	-1
415.795	-0.97
416.156	-0.95
416.517	-0.94
416.877	-0.92
417.238	-0.9
417.599	-0.88
417.959	-0.87
418.32	-0.84
418.68	-0.83
419.041	-0.81
419.401	-0.79
419.761	-0.78
420.122	-0.75
420.482	-0.73
420.842	-0.72
421.203	-0.7
421.563	-0.7
421.923	-0.68
422.283	-0.68
422.643	-0.66
423.004	-0.65
423.364	-0.64
423.724	-0.63
424.084	-0.62
424.444	-0.62
424.804	-0.6
425.163	-0.59
425.523	-0.58
425.883	-0.57
426.243	-0.55
426.603	-0.54
426.963	-0.53
427.322	-0.52
427.682	-0.51
428.042	-0.5
428.401	-0.49
428.761	-0.47
429.12	-0.46
429.48	-0.44
429.839	-0.44
430.199	-0.43
430.558	-0.42
430.918	-0.41
431.277	-0.4
431.636	-0.39
431.996	-0.37
432.355	-0.37
432.714	-0.37
433.073	-0.37
433.432	-0.37
433.792	-0.36
434.151	-0.36
434.51	-0.36
434.869	-0.36
435.228	-0.35
435.587	-0.35
435.946	-0.35
436.305	-0.34
436.663	-0.34
437.022	-0.34
437.381	-0.32
437.74	-0.31
438.099	-0.3
438.457	-0.28
438.816	-0.27
439.175	-0.26
439.533	-0.24
439.892	-0.23
440.25	-0.22
440.609	-0.21
440.967	-0.21
441.326	-0.2
441.684	-0.19
442.042	-0.18
442.401	-0.16
442.759	-0.15
443.117	-0.14
443.475	-0.13
443.834	-0.11
444.192	-0.14
444.55	-0.12
444.908	-0.1
445.266	-0.08
445.624	-0.06
445.982	-0.03
446.34	-0.02
446.698	0
447.056	0.03
447.414	0.05
447.772	0.06
448.129	0.12
448.487	0.14
448.845	0.15
449.203	0.17
449.56	0.19
449.918	0.21
450.276	0.23
450.633	0.26
450.991	0.28
451.348	0.31
451.706	0.35
452.063	0.38
452.42	0.41
452.778	0.44
453.135	0.47
453.492	0.49
453.85	0.51
454.207	0.54
454.564	0.55
454.921	0.56
455.278	0.58
455.635	0.59
455.992	0.6
456.349	0.61
456.706	0.62
457.063	0.64
457.42	0.66
457.777	0.68
458.134	0.69
458.491	0.7
458.848	0.71
459.204	0.73
459.561	0.73
459.918	0.74
460.274	0.74
460.631	0.74
460.988	0.73
461.344	0.74
461.701	0.74
462.057	0.74
462.414	0.75
462.77	0.76
463.126	0.76
463.483	0.77
463.839	0.78
464.195	0.79
464.551	0.82
464.908	0.84
465.264	0.85
465.62	0.86
465.976	0.87
466.332	0.87
466.688	0.88
467.044	0.88
467.4	0.89
467.756	0.88
468.112	0.89
468.468	0.89
468.823	0.89
469.179	0.9
469.535	0.91
469.891	0.92
470.246	0.93
470.602	0.93
470.958	0.93
471.313	0.94
471.669	0.94
472.024	0.95
472.38	0.96
472.735	0.95
473.091	0.95
473.446	0.95
473.801	0.94
474.156	0.94
474.512	0.94
474.867	0.96
475.222	0.96
475.577	0.96
475.932	0.97
476.287	0.96
476.643	0.96
476.998	0.96
477.352	0.97
477.707	0.97
478.062	0.98
478.417	0.97
478.772	0.96
479.127	0.96
479.482	0.96
479.836	0.96
480.191	0.96
480.546	0.96
480.9	0.97
481.255	0.96
481.609	0.95
481.964	0.95
482.318	0.95
482.673	0.95
483.027	0.94
483.382	0.93
483.736	0.92
484.09	0.9
484.445	0.88
484.799	0.88
485.153	0.88
485.507	0.89
485.861	0.89
486.215	0.89
486.569	0.9
486.923	0.9
487.277	0.91
487.631	0.91
487.985	0.92
488.339	0.93
488.693	0.93
489.047	0.94
489.4	0.95
489.754	0.96
490.108	0.98
490.462	0.99
490.815	1
491.169	1.02
491.522	1.04
491.876	1.06
492.229	1.08
492.583	1.1
492.936	1.12
493.289	1.15
493.643	1.17
493.996	1.2
494.349	1.22
494.703	1.24
495.056	1.27
495.409	1.3
495.762	1.33
496.115	1.38
496.468	1.43
496.821	1.49
497.174	1.54
497.527	1.59
497.88	1.62
498.233	1.64
498.586	1.66
498.938	1.69
499.291	1.72
499.644	1.75
499.997	1.79
500.349	1.82
500.702	1.86
501.054	1.91
501.407	1.95
501.759	2
502.112	2.05
502.464	2.1
502.817	2.15
503.169	2.2
503.521	2.25
503.874	2.29
504.226	2.34
504.578	2.39
504.93	2.43
505.282	2.47
505.634	2.51
505.986	2.56
506.338	2.6
506.69	2.65
507.042	2.69
507.394	2.73
507.746	2.77
508.098	2.81
508.45	2.84
508.802	2.88
509.153	2.92
509.505	2.96
509.857	3
510.208	3.04
510.56	3.07
510.911	3.11
511.263	3.14
511.614	3.19
511.966	3.22
512.317	3.25
512.668	3.3
513.02	3.33
513.371	3.37
513.722	3.41
514.073	3.45
514.425	3.49
514.776	3.53
515.127	3.58
515.478	3.62
515.829	3.66
516.18	3.71
516.531	3.76
516.882	3.81
517.233	3.86
517.583	3.91
517.934	3.94
518.285	3.97
518.636	3.99
518.986	4
519.337	4.02
519.688	4.04
520.038	4.06
520.389	4.08
520.739	4.12
521.09	4.15
521.44	4.18
521.79	4.22
522.141	4.26
522.491	4.31
522.841	4.37
523.192	4.43
523.542	4.5
523.892	4.57
524.242	4.63
524.592	4.69
524.942	4.74
525.292	4.79
525.642	4.84
525.992	4.88
526.342	4.91
526.692	4.94
527.041	4.97
527.391	5
527.741	5.04
528.091	5.07
528.44	5.1
528.79	5.13
529.14	5.18
529.489	5.28
529.839	5.4
530.188	5.49
530.537	5.55
530.887	5.59
531.236	5.64
531.586	5.68
531.935	5.72
532.284	5.76
532.633	5.82
532.982	5.88
533.332	5.91
533.681	5.9
534.03	5.91
534.379	5.96
534.728	6
535.077	6.05
535.425	6.1
535.774	6.15
536.123	6.2
536.472	6.24
536.821	6.29
537.169	6.33
537.518	6.39
537.867	6.45
538.215	6.53
538.564	6.61
538.912	6.68
539.261	6.74
539.609	6.79
539.957	6.83
540.306	6.88
540.654	6.93
541.002	6.99
541.351	7.05
541.699	7.11
542.047	7.14
542.395	7.17
542.743	7.19
543.091	7.21
543.439	7.24
543.787	7.27
544.135	7.29
544.483	7.31
544.831	7.34
545.179	7.39
545.526	7.44
545.874	7.51
546.222	7.58
546.569	7.65
546.917	7.73
547.265	7.79
547.612	7.84
547.96	7.9
548.307	7.96
548.655	8.02
549.002	8.07
549.349	8.12
549.697	8.17
550.044	8.23
550.391	8.28
550.738	8.34
551.085	8.41
551.432	8.48
551.78	8.57
552.127	8.65
552.474	8.72
552.82	8.78
553.167	8.82
553.514	8.85
553.861	8.88
554.208	8.9
554.555	8.93
554.901	8.95
555.248	8.99
555.595	9.03
555.941	9.06
556.288	9.09
556.634	9.13
556.981	9.19
557.327	9.24
557.673	9.3
558.02	9.37
558.366	9.42
558.712	9.47
559.059	9.51
559.405	9.55
559.751	9.59
560.097	9.63
560.443	9.67
560.789	9.7
561.135	9.74
561.481	9.78
561.827	9.82
562.173	9.84
562.519	9.86
562.865	9.89
563.21	9.92
563.556	9.94
563.902	9.96
564.247	9.99
564.593	10.01
564.938	10.04
565.284	10.06
565.629	10.07
565.975	10.08
566.32	10.1
566.666	10.1
567.011	10.09
567.356	10.08
567.701	10.08
568.047	10.08
568.392	10.09
568.737	10.1
569.082	10.11
569.427	10.13
569.772	10.14
570.117	10.16
570.462	10.19
570.807	10.21
571.151	10.24
571.496	10.26
571.841	10.27
572.186	10.26
572.53	10.23
572.875	10.2
573.219	10.18
573.564	10.17
573.909	10.15
574.253	10.15
574.597	10.15
574.942	10.14
575.286	10.14
575.63	10.13
575.975	10.11
576.319	10.12
576.663	10.12
577.007	10.13
577.351	10.14
577.695	10.15
578.039	10.15
578.383	10.15
578.727	10.15
579.071	10.15
579.415	10.17
579.759	10.19
580.103	10.2
580.446	10.22
580.79	10.22
581.134	10.23
581.477	10.22
581.821	10.21
582.164	10.21
582.508	10.21
582.851	10.21
583.195	10.2
583.538	10.2
583.881	10.19
584.224	10.17
584.568	10.17
584.911	10.16
585.254	10.15
585.597	10.16
585.94	10.14
586.283	10.14
586.626	10.13
586.969	10.11
587.312	10.11
587.655	10.09
587.998	10.08
588.341	10.06
588.683	10.04
589.026	10.02
589.369	9.98
589.711	9.97
590.054	9.94
590.396	9.92
590.739	9.91
591.081	9.87
591.424	9.85
591.766	9.83
592.108	9.82
592.451	9.81
592.793	9.79
593.135	9.79
593.477	9.78
593.819	9.77
594.161	9.77
594.503	9.77
594.845	9.77
595.187	9.77
595.529	9.76
595.871	9.74
596.213	9.74
596.555	9.74
596.896	9.71
597.238	9.7
597.58	9.66
597.921	9.62
598.263	9.57
598.604	9.53
598.946	9.51
599.287	9.51
599.629	9.51
599.97	9.51
600.311	9.51
600.653	9.53
600.994	9.53
601.335	9.55
601.676	9.58
602.017	9.62
602.358	9.65
602.699	9.66
603.04	9.66
603.381	9.66
603.722	9.61
604.063	9.58
604.404	9.54
604.745	9.51
605.085	9.45
605.426	9.39
605.767	9.34
606.107	9.29
606.448	9.26
606.788	9.24
607.129	9.23
607.469	9.24
607.809	9.24
608.15	9.25
608.49	9.24
608.83	9.25
609.171	9.28
609.511	9.29
609.851	9.29
610.191	9.26
610.531	9.21
610.871	9.15
611.211	9.09
611.551	9.05
611.891	9.02
612.23	9
612.57	8.98
612.91	8.96
613.25	8.95
613.589	8.94
613.929	8.95
614.269	8.97
614.608	8.98
614.948	8.98
615.287	8.96
615.626	8.94
615.966	8.91
616.305	8.88
616.644	8.84
616.984	8.81
617.323	8.78
617.662	8.75
618.001	8.71
618.34	8.67
618.679	8.63
619.018	8.59
619.357	8.55
619.696	8.52
620.035	8.49
620.373	8.45
620.712	8.4
621.051	8.36
621.389	8.32
621.728	8.29
622.067	8.27
622.405	8.26
622.744	8.25
623.082	8.23
623.42	8.21
623.759	8.21
624.097	8.19
624.435	8.18
624.774	8.17
625.112	8.17
625.45	8.16
625.788	8.15
626.126	8.13
626.464	8.11
626.802	8.09
627.14	8.06
627.478	8.03
627.816	8
628.154	7.97
628.491	7.95
628.829	7.91
629.167	7.89
629.504	7.87
629.842	7.86
630.179	7.86
630.517	7.85
630.854	7.84
631.192	7.85
631.529	7.85
631.866	7.86
632.204	7.86
632.541	7.88
632.878	7.89
633.215	7.9
633.552	7.9
633.889	7.9
634.226	7.89
634.563	7.88
634.9	7.86
635.237	7.85
635.574	7.84
635.911	7.81
636.247	7.79
636.584	7.77
636.921	7.74
637.257	7.72
637.594	7.69
637.93	7.67
638.267	7.65
638.603	7.63
638.939	7.6
639.276	7.57
639.612	7.56
639.948	7.54
640.285	7.51
640.621	7.48
640.957	7.44
641.293	7.42
641.629	7.39
641.965	7.36
642.301	7.33
642.637	7.28
642.973	7.25
643.308	7.19
643.644	7.14
643.98	7.1
644.315	7.03
644.651	6.97
644.987	6.91
645.322	6.86
645.658	6.79
645.993	6.71
646.329	6.67
646.664	6.62
646.999	6.57
647.334	6.5
647.67	6.44
648.005	6.38
648.34	6.31
648.675	6.24
649.01	6.18
649.345	6.13
649.68	6.07
650.015	6
650.35	5.93
650.685	5.86
651.019	5.8
651.354	5.73
651.689	5.67
652.023	5.62
652.358	5.56
652.693	5.5
653.027	5.44
653.361	5.41
653.696	5.36
654.03	5.32
654.365	5.27
654.699	5.23
655.033	5.2
655.367	5.18
655.701	5.15
656.035	5.11
656.369	5.08
656.703	5.03
657.037	4.96
657.371	4.91
657.705	4.86
658.039	4.79
658.373	4.74
658.707	4.65
659.04	4.58
659.374	4.48
659.707	4.39
660.041	4.26
660.374	4.15
660.708	4.03
661.041	3.92
661.375	3.81
661.708	3.71
662.041	3.63
662.374	3.52
662.708	3.41
663.041	3.32
663.374	3.24
663.707	3.16
664.04	3.08
664.373	3
664.706	2.91
665.039	2.83
665.371	2.74
665.704	2.64
666.037	2.56
666.37	2.46
666.702	2.37
667.035	2.26
667.367	2.17
667.7	2.06
668.032	1.95
668.365	1.85
668.697	1.75
669.029	1.64
669.362	1.53
669.694	1.42
670.026	1.32
670.358	1.2
670.69	1.08
671.022	0.95
671.354	0.87
671.686	0.79
672.018	0.69
672.35	0.6
672.682	0.52
673.013	0.46
673.345	0.39
673.677	0.35
674.008	0.31
674.34	0.27
674.671	0.24
675.003	0.21
675.334	0.17
675.666	0.14
675.997	0.13
676.328	0.11
676.659	0.09
676.991	0.07
677.322	0.04
677.653	0.02
677.984	-0.02
678.315	-0.07
678.646	-0.12
678.977	-0.17
679.308	-0.23
679.639	-0.31
679.969	-0.39
680.3	-0.47
680.631	-0.55
680.961	-0.67
681.292	-0.77
681.622	-0.86
681.953	-0.95
682.283	-1.04
682.614	-1.11
682.944	-1.15
683.274	-1.16
683.605	-1.18
683.935	-1.16
684.265	-1.15
684.595	-1.11
684.925	-1.03
685.255	-0.93
685.585	-0.85
685.915	-0.74
686.245	-0.64
686.575	-0.56
686.905	-0.51
687.234	-0.47
687.564	-0.45
687.894	-0.4
688.223	-0.36
688.553	-0.36
688.882	-0.38
689.212	-0.37
689.541	-0.35
689.871	-0.35
690.2	-0.35
690.529	-0.33
690.858	-0.32
691.187	-0.31
691.517	-0.28
691.846	-0.24
692.175	-0.23
692.504	-0.21
692.833	-0.18
693.162	-0.13
693.49	-0.08
693.819	-0.03
694.148	-0.01
694.477	0.04
694.805	0.09
695.134	0.13
695.462	0.12
695.791	0.15
696.119	0.15
696.448	0.18
696.776	0.13
697.104	0.11
697.433	0.08
697.761	0.05
698.089	-0.02
698.417	-0.08
698.745	-0.19
699.073	-0.29
699.401	-0.44
699.729	-0.64
700.057	-0.88
700.385	-1.02
700.713	-1.2
701.04	-1.35
701.368	-1.46
701.696	-1.54
702.023	-1.62
702.351	-1.71
702.678	-1.76
703.006	-1.81
703.333	-1.8
703.661	-1.78
703.988	-1.83
704.315	-1.81
704.642	-1.86
704.969	-1.86
705.297	-1.92
705.624	-2.03
705.951	-2.1
706.278	-2.23
706.604	-2.36
706.931	-2.5
707.258	-2.65
707.585	-2.78
707.912	-2.96
708.238	-3.08
708.565	-3.27
708.892	-3.51
709.218	-3.69
709.545	-3.92
709.871	-4.14
710.197	-4.32
710.524	-4.52
710.85	-4.7
711.176	-4.92
711.502	-5.15
711.829	-5.36
712.155	-5.61
712.481	-5.81
712.807	-6.02
713.133	-6.2
713.458	-6.4
713.784	-6.63
714.11	-6.92
714.436	-7.15
714.762	-7.38
715.087	-7.61
715.413	-7.84
715.738	-8.11
716.064	-8.36
716.389	-8.64
716.715	-8.95
717.04	-9.21
717.365	-9.54
717.691	-9.8
718.016	-10.08
718.341	-10.35
718.666	-10.64
718.991	-10.9
719.316	-11.15
719.641	-11.42
719.966	-11.68
720.291	-11.91
720.616	-12.17
720.941	-12.39
721.265	-12.64
721.59	-12.87
721.915	-13.12
722.239	-13.36
722.564	-13.7
722.888	-13.93
723.213	-14.18
723.537	-14.43
723.861	-14.72
724.186	-14.96
724.51	-15.21
724.834	-15.51
725.158	-15.83
725.482	-16.21
725.806	-16.57
726.13	-16.82
726.454	-17.19
726.778	-17.46
727.102	-17.82
727.426	-18.15
727.749	-18.49
728.073	-18.87
728.397	-19.24
728.72	-19.63
729.044	-19.95
729.367	-20.29
729.691	-20.72
730.014	-21.1
730.337	-21.51
730.661	-21.84
730.984	-22.18
731.307	-22.56
731.63	-22.91
731.953	-23.18
732.276	-23.5
732.599	-23.77
732.922	-24.05
733.245	-24.38
733.568	-24.68
733.891	-25.04
734.213	-25.41
734.536	-25.73
734.859	-26.12
735.181	-26.45
735.504	-26.84
735.826	-27.21
736.149	-27.57
736.471	-27.93
736.793	-28.24
737.116	-28.6
737.438	-28.91
737.76	-29.21
738.082	-29.57
738.404	-29.84
738.726	-30.2
739.048	-30.52
739.37	-30.77
739.692	-31.15
740.014	-31.46
740.336	-31.74
740.658	-32
740.979	-32.25
741.301	-32.56
741.622	-32.87
741.944	-33.16
742.265	-33.41
742.587	-33.6
742.908	-33.97
743.23	-34.31
743.551	-34.6
743.872	-34.91
744.193	-35.34
744.514	-35.69
744.835	-35.95
745.156	-36.24
745.477	-36.54
745.798	-36.88
746.119	-37.18
746.44	-37.4
746.761	-37.7
747.081	-37.92
747.402	-38.26
747.723	-38.54
748.043	-38.84
748.364	-39.25
748.684	-39.51
749.005	-39.94
749.325	-40.26
749.645	-40.61
749.966	-40.89
750.286	-41.08
750.606	-41.56
750.926	-41.75
751.246	-41.94
751.566	-42.3
751.886	-42.54
752.206	-42.93
752.526	-43.19
752.846	-43.32
753.165	-43.64
753.485	-43.98
753.805	-44.28
754.124	-44.37
754.444	-44.66
754.763	-45
755.083	-45.12
755.402	-45.2
755.721	-45.38
756.041	-45.5
756.36	-45.87
756.679	-46.09
756.998	-46.32
757.317	-46.41
757.636	-46.67
757.955	-46.84
758.274	-47
758.593	-47.29
758.912	-47.62
759.231	-47.73
759.549	-47.96
759.868	-48.12
760.187	-48.39
760.505	-48.6
760.824	-48.91
761.142	-49.09
761.461	-49.4
761.779	-49.64
762.097	-49.83
762.416	-49.99
762.734	-50.25
763.052	-50.56
763.37	-50.83
763.688	-50.94
764.006	-51.16
764.324	-51.45
764.642	-51.78
764.96	-52
765.278	-52.05
765.595	-52.25
765.913	-52.44
766.231	-52.63
766.548	-52.57
766.866	-52.67
767.183	-52.83
767.501	-52.91
767.818	-52.98
768.135	-52.96
768.453	-53.07
768.77	-53.21
769.087	-53.31
769.404	-53.56
769.721	-53.79
770.038	-54.2
770.355	-54.43
770.672	-54.59
770.989	-54.73
771.306	-54.75
771.622	-55.07
771.939	-55.24
772.256	-55.4
772.572	-55.56
772.889	-55.59
773.205	-55.58
773.522	-55.62
773.838	-55.62
774.154	-55.93
774.471	-56.2
774.787	-56.58
775.103	-56.68
775.419	-56.85
775.735	-57.12
776.051	-57.39
776.367	-57.64
776.683	-57.89
776.999	-57.96
777.315	-58.05
777.63	-57.9
777.946	-58.01
778.262	-58.01
778.577	-58.05
778.893	-57.96
779.208	-57.98
779.524	-58.04
779.839	-57.75
780.155	-57.89
780.47	-57.95
780.785	-58.05
781.1	-58.3
781.415	-58.32
781.73	-58.55
782.045	-58.58
782.36	-58.82
782.675	-58.9
782.99	-58.91
783.305	-59.16
783.62	-59.16
783.934	-59.2
784.249	-59.44
784.564	-59.61
784.878	-59.58
785.193	-59.5
785.507	-59.64
785.821	-59.57
786.136	-59.49
786.45	-59.52
786.764	-59.6
787.078	-59.69
787.392	-59.92
787.706	-60.11
788.02	-59.97
788.334	-60.33
788.648	-60.38
788.962	-60.64
789.276	-60.85
789.59	-60.97
789.903	-61.2
790.217	-61.18
790.53	-60.98
790.844	-60.93
791.157	-60.67
791.471	-60.69
791.784	-60.7
792.097	-60.76
792.411	-60.78
792.724	-60.62
793.037	-60.66
793.35	-60.66
793.663	-60.81
793.976	-61.03
794.289	-61.2
794.602	-61.18
794.915	-61.24
795.228	-61.32
795.54	-61.38
795.853	-61.24
796.165	-61.61
796.478	-61.76
796.791	-61.64
797.103	-61.55
797.415	-61.46
797.728	-61.17
798.04	-61.45
798.352	-61.43
798.664	-61.09
798.976	-60.96
799.289	-60.96
799.601	-60.87
799.913	-60.66
800.224	-60.7
800.536	-60.72
800.848	-60.7
801.16	-60.9
801.471	-60.77
801.783	-61.01
802.095	-61.16
802.406	-61.47
802.718	-61.7
803.029	-61.83
803.34	-62.34
803.652	-62.5
803.963	-62.79
804.274	-63.07
804.585	-63.04
804.896	-63.33
805.207	-63.26
805.518	-63.37
805.829	-63.37
806.14	-63.17
806.451	-63.2
806.762	-62.88
807.072	-62.74
807.383	-62.32
807.694	-62.11
808.004	-62.3
808.315	-62.04
808.625	-61.76
808.936	-61.65
809.246	-61.59
809.556	-61.77
809.866	-61.61
810.177	-61.82
810.487	-61.96
810.797	-62.09
811.107	-62.23
811.417	-62.01
811.726	-62.02
812.036	-62.33
812.346	-62.35
812.656	-62.34
812.965	-62.3
813.275	-62.23
813.585	-62.2
813.894	-62.17
814.204	-62.43
814.513	-62.42
814.822	-62.63
815.132	-62.58
815.441	-62.55
815.75	-62.55
816.059	-62.82
816.368	-62.92
816.677	-63.27
816.986	-63.36
817.295	-63.35
817.604	-63.39
817.913	-63.5
818.221	-63.58
818.53	-64.12
818.839	-64.32
819.147	-64.42
819.456	-64.41
819.764	-64.27
820.073	-64.24
820.381	-63.97
820.689	-64.21
820.997	-64.34
821.306	-64.28
821.614	-64.3
821.922	-64.25
822.23	-64.12
822.538	-64.13
822.846	-64.1
823.153	-63.97
823.461	-63.48
823.769	-62.71
824.077	-62
824.384	-61.52
824.692	-61.31
824.999	-61.28
825.307	-61.17
825.614	-61.14
825.922	-61.11
826.229	-61.03
826.536	-60.97
826.843	-61.01
827.15	-61.16
827.457	-61.4
827.764	-61.71
828.071	-62.03
828.378	-62.19
828.685	-62.4
828.992	-62.6
829.299	-62.7
829.605	-62.93
829.912	-63.19
830.218	-63.28
830.525	-63.47
830.831	-63.57
831.138	-63.55
831.444	-63.64
831.75	-63.6
832.057	-63.72
832.363	-63.85
832.669	-64.11
832.975	-64.21
833.281	-64.42
833.587	-64.59
833.893	-64.59
834.199	-64.71
834.504	-64.75
834.81	-64.64
835.116	-65.06
835.421	-65.02
835.727	-64.89
836.032	-64.73
836.338	-64.79
836.643	-64.72
836.949	-64.58
837.254	-64.51
837.559	-64.43
837.864	-64.53
838.169	-64.43
838.474	-64.37
838.779	-64.46
839.084	-64.43
839.389	-64.56
839.694	-64.5
839.999	-64.32
840.303	-64.38
840.608	-64.57
840.913	-64.42
841.217	-64.6
841.522	-64.78
841.826	-64.84
842.13	-64.57
842.435	-64.67
842.739	-64.73
843.043	-64.82
843.347	-64.9
843.651	-65.04
843.955	-65.17
844.259	-65.54
844.563	-65.32
844.867	-65.29
845.171	-65.39
845.475	-65.48
845.778	-65.64
846.082	-65.9
846.385	-66.04
846.689	-65.95
846.992	-66.28
847.296	-66.28
847.599	-66.36
847.902	-66.54
848.206	-67.22
848.509	-67
848.812	-67.01
849.115	-66.95
849.418	-66.77
849.721	-66.56
850.024	-66.87
850.327	-67.29
850.629	-66.97
850.932	-66.56
851.235	-66.46
851.537	-65.8
851.84	-65.3
852.142	-65.47
852.445	-65.84
852.747	-65.9
853.049	-65
853.352	-64.94
853.654	-64.33
853.956	-64.8
854.258	-64.92
854.56	-64.81
854.862	-65.67
855.164	-66.1
855.466	-66.29
855.767	-65.89
856.069	-65.98
856.371	-66.81
856.672	-67.03
856.974	-67.48
857.275	-67.01
857.577	-66.85
857.878	-66.79
858.18	-66.22
858.481	-66.13
858.782	-66.15
859.083	-66.23
859.384	-66.35
859.685	-66.55
859.986	-66.6
860.287	-65.96
860.588	-67.03
860.889	-67.24
861.19	-67.53
861.49	-67.8
861.791	-67.79
862.092	-67.72
862.392	-67.84
862.693	-67.76
862.993	-67.41
863.293	-68.08
863.594	-68.09
863.894	-67.17
864.194	-67.21
864.494	-67.04
864.794	-66.26
865.094	-66.48
865.394	-66.15
865.694	-66.09
865.994	-65.59
866.293	-65.28
866.593	-65.07
866.893	-64.63
867.192	-64.84
867.492	-64.87
867.791	-65.08
868.091	-65.7
868.39	-65.35
868.689	-65.12
[truncated: 47 more rows]

## Sheet: Citmoc02
179.63	-178.9
180.007	-369.13
180.384	-548.36
180.761	1757.98
181.138	555.72
181.515	388.44
181.892	908.11
182.269	687.91
182.646	-9370.31
183.023	-968.32
183.4	-1172.87
183.777	116.4
184.154	-128
184.53	-497.57
184.907	129.72
185.284	188.69
185.661	87.7
186.038	2.16
186.414	1.26
186.791	-3.05
187.168	11.73
187.545	8.56
187.921	9.79
188.298	12.7
188.675	11.76
189.051	12
189.428	10.73
189.804	9.2
190.181	9.14
190.558	7.17
190.934	7.08
191.311	4.49
191.687	4.68
192.064	7.73
192.44	8.63
192.817	7.29
193.193	7.75
193.569	9.34
193.946	9.82
194.322	7.73
194.698	9.42
195.075	10.67
195.451	9.43
195.827	10.33
196.203	11.13
196.58	9.78
196.956	11.46
197.332	11.33
197.708	10.04
198.084	9.84
198.461	12.17
198.837	11.97
199.213	11.09
199.589	12.84
199.965	12.72
200.341	10.86
200.717	10.5
201.093	10.09
201.469	9.4
201.845	11.16
202.221	10.84
202.597	9.08
202.972	9.91
203.348	9.08
203.724	8.96
204.1	6.76
204.476	4.29
204.852	6.88
205.227	7.92
205.603	9.98
205.979	8.17
206.355	7.12
206.73	8.09
207.106	6.68
207.481	6.77
207.857	7.16
208.233	8.63
208.608	10.56
208.984	9.13
209.359	7.26
209.735	5.1
210.11	5.82
210.486	6.79
210.861	5.76
211.237	7.88
211.612	9.87
211.987	8.89
212.363	7
212.738	6.77
213.113	6.26
213.489	7.64
213.864	9.13
214.239	9.51
214.615	10.76
214.99	11
215.365	8.56
215.74	9.63
216.115	10.69
216.49	12.23
216.866	13.08
217.241	13.74
217.616	12.31
217.991	12.41
218.366	12.23
218.741	11.18
219.116	11.58
219.491	11.83
219.866	10.85
220.241	11.16
220.615	11.37
220.99	9.66
221.365	9.55
221.74	10.85
222.115	10.53
222.49	11.33
222.864	11.88
223.239	10.69
223.614	10.78
223.988	11.99
224.363	11.79
224.738	11.24
225.112	13.28
225.487	13.71
225.862	14.01
226.236	13.31
226.611	13.37
226.985	12.9
227.36	14.12
227.734	13.88
228.109	12.91
228.483	13.17
228.858	14.04
229.232	13.52
229.606	13.58
229.981	13.21
230.355	13.33
230.729	13.4
231.104	13.55
231.478	13.52
231.852	13.67
232.226	13.68
232.601	13.53
232.975	13.32
233.349	13.28
233.723	12.98
234.097	13.05
234.471	13.11
234.845	12.77
235.219	12.67
235.593	12.42
235.967	12.46
236.341	12.35
236.715	12.33
237.089	12.41
237.463	12.6
237.837	12.66
238.211	12.54
238.585	12.49
238.958	12.31
239.332	12.18
239.706	12.12
240.08	12.17
240.453	12.17
240.827	12.03
241.201	11.88
241.575	11.88
241.948	11.9
242.322	11.97
242.695	11.93
243.069	11.93
243.442	11.9
243.816	11.86
244.189	11.72
244.563	11.69
244.936	11.62
245.31	11.6
245.683	11.55
246.057	11.51
246.43	11.44
246.803	11.4
247.177	11.35
247.55	11.29
247.923	11.2
248.296	11.1
248.67	11.05
249.043	11.07
249.416	11.03
249.789	10.98
250.162	10.96
250.535	10.92
250.909	10.88
251.282	10.85
251.655	10.82
252.028	10.84
252.401	10.83
252.774	10.81
253.147	10.75
253.52	10.75
253.892	10.74
254.265	10.73
254.638	10.74
255.011	10.74
255.384	10.75
255.757	10.67
256.129	10.61
256.502	10.65
256.875	10.65
257.247	10.67
257.62	10.67
257.993	10.63
258.365	10.63
258.738	10.58
259.111	10.57
259.483	10.56
259.856	10.56
260.228	10.52
260.601	10.41
260.973	10.34
261.346	10.28
261.718	10.25
262.09	10.25
262.463	10.22
262.835	10.19
263.207	10.17
263.58	10.13
263.952	10.1
264.324	10.07
264.696	10.1
265.069	10.13
265.441	10.16
265.813	10.17
266.185	10.17
266.557	10.21
266.929	10.23
267.301	10.25
267.673	10.31
268.045	10.32
268.417	10.33
268.789	10.32
269.161	10.32
269.533	10.32
269.905	10.31
270.277	10.28
270.649	10.27
271.02	10.26
271.392	10.25
271.764	10.23
272.136	10.22
272.507	10.21
272.879	10.18
273.251	10.17
273.622	10.16
273.994	10.17
274.366	10.2
274.737	10.21
275.109	10.23
275.48	10.23
275.852	10.25
276.223	10.26
276.595	10.28
276.966	10.3
277.338	10.28
277.709	10.3
278.08	10.3
278.452	10.29
278.823	10.29
279.194	10.29
279.565	10.28
279.937	10.26
280.308	10.27
280.679	10.26
281.05	10.25
281.421	10.27
281.792	10.28
282.163	10.27
282.535	10.24
282.906	10.23
283.277	10.22
283.648	10.23
284.018	10.25
284.389	10.26
284.76	10.25
285.131	10.25
285.502	10.28
285.873	10.28
286.244	10.28
286.614	10.26
286.985	10.25
287.356	10.26
287.727	10.25
288.097	10.25
288.468	10.25
288.839	10.25
289.209	10.23
289.58	10.21
289.95	10.2
290.321	10.19
290.691	10.22
291.062	10.21
291.432	10.19
291.803	10.18
292.173	10.16
292.544	10.14
292.914	10.15
293.284	10.18
293.655	10.19
294.025	10.19
294.395	10.23
294.765	10.22
295.135	10.23
295.506	10.23
295.876	10.22
296.246	10.22
296.616	10.22
296.986	10.19
297.356	10.15
297.726	10.12
298.096	10.09
298.466	10.05
298.836	10.06
299.206	10.06
299.576	10.08
299.946	10.08
300.316	10.07
300.685	10.08
301.055	10.1
301.425	10.12
301.795	10.14
302.164	10.14
302.534	10.13
302.904	10.11
303.273	10.1
303.643	10.09
304.013	10.08
304.382	10.07
304.752	10.05
305.121	10.01
305.491	10
305.86	9.98
306.23	10
306.599	10.02
306.968	10.02
307.338	10.03
307.707	10.03
308.076	10.06
308.446	10.06
308.815	10.04
309.184	10.07
309.553	10.07
309.922	10.08
310.292	10.05
310.661	10.04
311.03	10.02
311.399	9.97
311.768	9.93
312.137	9.88
312.506	9.85
312.875	9.86
313.244	9.82
313.613	9.8
313.982	9.77
314.35	9.72
314.719	9.68
315.088	9.64
315.457	9.61
315.826	9.57
316.194	9.48
316.563	9.39
316.932	9.26
317.3	9.19
317.669	9.07
318.037	8.99
318.406	8.94
318.775	8.82
319.143	8.75
319.512	8.67
319.88	8.56
320.248	8.49
320.617	8.44
320.985	8.38
321.354	8.32
321.722	8.29
322.09	8.24
322.458	8.2
322.827	8.17
323.195	8.11
323.563	8.03
323.931	8.03
324.299	8
324.667	7.98
325.035	7.95
325.404	7.87
325.772	7.82
326.14	7.76
326.508	7.69
326.875	7.63
327.243	7.57
327.611	7.56
327.979	7.53
328.347	7.53
328.715	7.5
329.083	7.47
329.45	7.47
329.818	7.43
330.186	7.42
330.553	7.41
330.921	7.42
331.289	7.46
331.656	7.45
332.024	7.41
332.391	7.35
332.759	7.27
333.126	7.21
333.494	7.15
333.861	7.14
334.229	7.09
334.596	7.05
334.963	6.99
335.331	6.94
335.698	6.88
336.065	6.86
336.432	6.81
336.8	6.79
337.167	6.78
337.534	6.79
337.901	6.75
338.268	6.76
338.635	6.71
339.002	6.7
339.369	6.68
339.736	6.66
340.103	6.62
340.47	6.62
340.837	6.58
341.204	6.52
341.571	6.46
341.938	6.42
342.304	6.36
342.671	6.36
343.038	6.3
343.404	6.24
343.771	6.22
344.138	6.2
344.504	6.13
344.871	6.1
345.238	6.08
345.604	6.06
345.971	6.02
346.337	5.98
346.704	5.93
347.07	5.91
347.436	5.89
347.803	5.84
348.169	5.83
348.535	5.8
348.902	5.79
349.268	5.76
349.634	5.74
350	5.73
350.366	5.72
350.733	5.69
351.099	5.66
351.465	5.64
351.831	5.61
352.197	5.56
352.563	5.53
352.929	5.5
353.295	5.48
353.661	5.44
354.027	5.42
354.392	5.4
354.758	5.35
355.124	5.31
355.49	5.28
355.856	5.28
356.221	5.26
356.587	5.25
356.953	5.21
357.318	5.19
357.684	5.16
358.049	5.15
358.415	5.11
358.78	5.1
359.146	5.08
359.511	5.08
359.877	5.07
360.242	5.07
360.608	5.07
360.973	5.07
361.338	5.06
361.703	5.05
362.069	5.02
362.434	4.99
362.799	4.98
363.164	4.97
363.529	4.97
363.895	4.96
364.26	4.96
364.625	4.95
364.99	4.97
365.355	4.97
365.72	4.99
366.085	5
366.449	5.05
366.814	5.07
367.179	5.09
367.544	5.08
367.909	5.07
368.274	5.07
368.638	5.07
369.003	5.1
369.368	5.14
369.732	5.15
370.097	5.17
370.461	5.16
370.826	5.17
371.19	5.21
371.555	5.25
371.919	5.29
372.284	5.3
372.648	5.34
373.013	5.33
373.377	5.33
373.741	5.33
374.106	5.38
374.47	5.42
374.834	5.46
375.198	5.48
375.562	5.5
375.927	5.54
376.291	5.57
376.655	5.59
377.019	5.64
377.383	5.68
377.747	5.71
378.111	5.71
378.475	5.74
378.839	5.78
379.202	5.83
379.566	5.88
379.93	5.92
380.294	5.95
380.658	5.98
381.021	6.02
381.385	6.05
381.749	6.1
382.112	6.17
382.476	6.24
382.839	6.27
383.203	6.28
383.566	6.31
383.93	6.34
384.293	6.38
384.657	6.43
385.02	6.48
385.384	6.53
385.747	6.57
386.11	6.6
386.473	6.64
386.837	6.7
387.2	6.75
387.563	6.79
387.926	6.83
388.289	6.88
388.652	6.91
389.015	6.95
389.378	6.99
389.741	7.04
390.104	7.07
390.467	7.12
390.83	7.13
391.193	7.17
391.556	7.2
391.919	7.24
392.281	7.28
392.644	7.33
393.007	7.38
393.37	7.43
393.732	7.48
394.095	7.53
394.458	7.56
394.82	7.61
395.183	7.65
395.545	7.68
395.908	7.72
396.27	7.77
396.632	7.81
396.995	7.83
397.357	7.86
397.719	7.87
398.082	7.9
398.444	7.94
398.806	7.98
399.168	8.02
399.531	8.06
399.893	8.1
400.255	8.14
400.617	8.18
400.979	8.22
401.341	8.25
401.703	8.3
402.065	8.35
402.427	8.4
402.789	8.44
403.15	8.48
403.512	8.53
403.874	8.56
404.236	8.59
404.598	8.63
404.959	8.65
405.321	8.72
405.683	8.75
406.044	8.77
406.406	8.78
406.767	8.8
407.129	8.82
407.49	8.85
407.852	8.87
408.213	8.9
408.574	8.93
408.936	8.96
409.297	8.97
409.658	9
410.02	9.01
410.381	9.03
410.742	9.04
411.103	9.07
411.464	9.09
411.825	9.12
412.186	9.14
412.548	9.15
412.909	9.18
413.269	9.2
413.63	9.22
413.991	9.24
414.352	9.26
414.713	9.29
415.074	9.3
415.435	9.32
415.795	9.34
416.156	9.34
416.517	9.35
416.877	9.36
417.238	9.36
417.599	9.36
417.959	9.37
418.32	9.37
418.68	9.37
419.041	9.36
419.401	9.37
419.761	9.36
420.122	9.36
420.482	9.36
420.842	9.35
421.203	9.35
421.563	9.34
421.923	9.33
422.283	9.34
422.643	9.36
423.004	9.37
423.364	9.38
423.724	9.4
424.084	9.4
424.444	9.4
424.804	9.4
425.163	9.4
425.523	9.42
425.883	9.44
426.243	9.46
426.603	9.48
426.963	9.51
427.322	9.53
427.682	9.54
428.042	9.57
428.401	9.61
428.761	9.65
429.12	9.7
429.48	9.74
429.839	9.77
430.199	9.8
430.558	9.8
430.918	9.8
431.277	9.81
431.636	9.82
431.996	9.83
432.355	9.82
432.714	9.81
433.073	9.8
433.432	9.78
433.792	9.76
434.151	9.75
434.51	9.75
434.869	9.75
435.228	9.74
435.587	9.75
435.946	9.77
436.305	9.78
436.663	9.8
437.022	9.81
437.381	9.83
437.74	9.85
438.099	9.87
438.457	9.88
438.816	9.89
439.175	9.9
439.533	9.88
439.892	9.86
440.25	9.85
440.609	9.82
440.967	9.8
441.326	9.79
441.684	9.77
442.042	9.77
442.401	9.78
442.759	9.8
443.117	9.81
443.475	9.83
443.834	9.85
444.192	9.83
444.55	9.85
444.908	9.87
445.266	9.88
445.624	9.9
445.982	9.91
446.34	9.88
446.698	9.85
447.056	9.83
447.414	9.81
447.772	9.8
448.129	9.83
448.487	9.85
448.845	9.87
449.203	9.88
449.56	9.91
449.918	9.92
450.276	9.95
450.633	10
450.991	10.05
451.348	10.09
451.706	10.13
452.063	10.16
452.42	10.18
452.778	10.18
453.135	10.18
453.492	10.17
453.85	10.17
454.207	10.19
454.564	10.18
454.921	10.18
455.278	10.17
455.635	10.18
455.992	10.18
456.349	10.19
456.706	10.2
457.063	10.23
457.42	10.24
457.777	10.26
458.134	10.25
458.491	10.25
458.848	10.23
459.204	10.22
459.561	10.2
459.918	10.17
460.274	10.13
460.631	10.08
460.988	10.05
461.344	10.05
461.701	10.06
462.057	10.07
462.414	10.08
462.77	10.09
463.126	10.1
463.483	10.12
463.839	10.14
464.195	10.17
464.551	10.22
464.908	10.26
465.264	10.28
465.62	10.28
465.976	10.27
466.332	10.27
466.688	10.26
467.044	10.25
467.4	10.22
467.756	10.19
468.112	10.19
468.468	10.17
468.823	10.15
469.179	10.16
469.535	10.16
469.891	10.16
470.246	10.16
470.602	10.16
470.958	10.16
471.313	10.18
471.669	10.21
472.024	10.24
472.38	10.26
472.735	10.27
473.091	10.26
473.446	10.25
473.801	10.23
474.156	10.22
474.512	10.22
474.867	10.24
475.222	10.23
475.577	10.24
475.932	10.24
476.287	10.23
476.643	10.23
476.998	10.22
477.352	10.22
477.707	10.23
478.062	10.23
478.417	10.23
478.772	10.23
479.127	10.22
479.482	10.2
479.836	10.19
480.191	10.18
480.546	10.18
480.9	10.17
481.255	10.16
481.609	10.14
481.964	10.12
482.318	10.1
482.673	10.06
483.027	10.04
483.382	9.99
483.736	9.93
484.09	9.86
484.445	9.92
484.799	10.16
485.153	10.37
485.507	10.45
485.861	10.47
486.215	10.48
486.569	10.49
486.923	10.49
487.277	10.49
487.631	10.49
487.985	10.5
488.339	10.47
488.693	10.32
489.047	10.15
489.4	10.06
489.754	10.03
490.108	10.03
490.462	10.03
490.815	10.03
491.169	10.04
491.522	10.06
491.876	10.06
492.229	10.03
492.583	10
492.936	9.98
493.289	9.98
493.643	9.98
493.996	9.99
494.349	9.99
494.703	10.01
495.056	10.02
495.409	10.05
495.762	10.1
496.115	10.16
496.468	10.23
496.821	10.27
497.174	10.28
497.527	10.26
497.88	10.22
498.233	10.19
498.586	10.18
498.938	10.17
499.291	10.17
499.644	10.18
499.997	10.2
500.349	10.21
500.702	10.23
501.054	10.27
501.407	10.29
501.759	10.32
502.112	10.35
502.464	10.37
502.817	10.38
503.169	10.39
503.521	10.4
503.874	10.41
504.226	10.42
504.578	10.42
504.93	10.41
505.282	10.42
505.634	10.43
505.986	10.43
506.338	10.44
506.69	10.46
507.042	10.47
507.394	10.48
507.746	10.48
508.098	10.49
508.45	10.5
508.802	10.51
509.153	10.51
509.505	10.52
509.857	10.51
510.208	10.53
510.56	10.52
510.911	10.54
511.263	10.54
511.614	10.55
511.966	10.55
512.317	10.56
512.668	10.58
513.02	10.58
513.371	10.59
513.722	10.6
514.073	10.61
514.425	10.63
514.776	10.64
515.127	10.65
515.478	10.67
515.829	10.68
516.18	10.7
516.531	10.71
516.882	10.74
517.233	10.76
517.583	10.76
517.934	10.76
518.285	10.75
518.636	10.74
518.986	10.72
519.337	10.7
519.688	10.69
520.038	10.68
520.389	10.69
520.739	10.71
521.09	10.73
521.44	10.75
521.79	10.77
522.141	10.79
522.491	10.82
522.841	10.86
523.192	10.9
523.542	10.92
523.892	10.96
524.242	10.98
524.592	10.99
524.942	10.99
525.292	10.99
525.642	11
525.992	10.99
526.342	10.98
526.692	10.96
527.041	10.96
527.391	10.98
527.741	10.98
528.091	10.98
528.44	10.98
528.79	10.97
529.14	11
529.489	11.14
529.839	11.33
530.188	11.47
530.537	11.54
530.887	11.59
531.236	11.61
531.586	11.64
531.935	11.67
532.284	11.7
532.633	11.76
532.982	11.8
533.332	11.74
533.681	11.59
534.03	11.47
534.379	11.42
534.728	11.4
535.077	11.41
535.425	11.42
535.774	11.44
536.123	11.46
536.472	11.49
536.821	11.51
537.169	11.52
537.518	11.55
537.867	11.59
538.215	11.63
538.564	11.67
538.912	11.71
539.261	11.73
539.609	11.75
539.957	11.77
540.306	11.78
540.654	11.82
541.002	11.85
541.351	11.89
541.699	11.89
542.047	11.88
542.395	11.89
542.743	11.89
543.091	11.92
543.439	11.93
543.787	11.96
544.135	11.98
544.483	11.99
544.831	12.01
545.179	12.05
545.526	12.1
545.874	12.16
546.222	12.21
546.569	12.25
546.917	12.27
547.265	12.29
547.612	12.29
547.96	12.32
548.307	12.35
548.655	12.39
549.002	12.42
549.349	12.45
549.697	12.48
550.044	12.51
550.391	12.55
550.738	12.58
551.085	12.63
551.432	12.69
551.78	12.75
552.127	12.8
552.474	12.85
552.82	12.88
553.167	12.88
553.514	12.89
553.861	12.9
554.208	12.91
554.555	12.92
554.901	12.95
555.248	12.98
555.595	12.99
555.941	13.02
556.288	13.04
556.634	13.07
556.981	13.11
557.327	13.17
557.673	13.22
558.02	13.28
558.366	13.32
558.712	13.35
559.059	13.37
559.405	13.4
559.751	13.44
560.097	13.48
560.443	13.5
560.789	13.53
561.135	13.56
561.481	13.59
561.827	13.62
562.173	13.64
562.519	13.66
562.865	13.7
563.21	13.73
563.556	13.76
563.902	13.78
564.247	13.81
564.593	13.84
564.938	13.86
565.284	13.89
565.629	13.92
565.975	13.95
566.32	13.98
566.666	13.97
567.011	13.97
567.356	13.98
567.701	13.99
568.047	14.02
568.392	14.05
568.737	14.08
569.082	14.12
569.427	14.15
569.772	14.17
570.117	14.21
570.462	14.26
570.807	14.3
571.151	14.34
571.496	14.38
571.841	14.4
572.186	14.4
572.53	14.39
572.875	14.38
573.219	14.37
573.564	14.38
573.909	14.38
574.253	14.4
574.597	14.42
574.942	14.44
575.286	14.45
575.63	14.46
575.975	14.48
576.319	14.52
576.663	14.54
577.007	14.58
577.351	14.62
577.695	14.64
578.039	14.65
578.383	14.66
578.727	14.68
579.071	14.7
579.415	14.72
579.759	14.74
580.103	14.76
580.446	14.79
580.79	14.8
581.134	14.81
581.477	14.82
581.821	14.82
582.164	14.84
582.508	14.85
582.851	14.86
583.195	14.87
583.538	14.89
583.881	14.89
584.224	14.89
584.568	14.9
584.911	14.9
585.254	14.89
585.597	14.91
585.94	14.91
586.283	14.91
586.626	14.9
586.969	14.9
587.312	14.9
587.655	14.9
587.998	14.91
588.341	14.9
588.683	14.91
589.026	14.91
589.369	14.89
589.711	14.88
590.054	14.86
590.396	14.85
590.739	14.82
591.081	14.8
591.424	14.79
591.766	14.77
592.108	14.77
592.451	14.76
592.793	14.76
593.135	14.77
593.477	14.77
593.819	14.77
594.161	14.78
594.503	14.79
594.845	14.79
595.187	14.8
595.529	14.78
595.871	14.77
596.213	14.77
596.555	14.76
596.896	14.75
597.238	14.72
597.58	14.7
597.921	14.66
598.263	14.62
598.604	14.61
598.946	14.6
599.287	14.62
599.629	14.64
599.97	14.64
600.311	14.65
600.653	14.66
600.994	14.68
601.335	14.71
601.676	14.74
602.017	14.79
602.358	14.8
602.699	14.8
603.04	14.79
603.381	14.76
603.722	14.72
604.063	14.68
604.404	14.65
604.745	14.62
605.085	14.57
605.426	14.53
605.767	14.49
606.107	14.47
606.448	14.47
606.788	14.48
607.129	14.49
607.469	14.51
607.809	14.52
608.15	14.53
608.49	14.54
608.83	14.56
609.171	14.59
609.511	14.6
609.851	14.6
610.191	14.57
610.531	14.51
610.871	14.45
611.211	14.41
611.551	14.41
611.891	14.41
612.23	14.41
612.57	14.41
612.91	14.42
613.25	14.42
613.589	14.43
613.929	14.45
614.269	14.48
614.608	14.51
614.948	14.51
615.287	14.49
615.626	14.45
615.966	14.42
616.305	14.38
616.644	14.34
616.984	14.31
617.323	14.28
617.662	14.24
618.001	14.21
618.34	14.18
618.679	14.15
619.018	14.12
619.357	14.1
619.696	14.07
620.035	14.05
620.373	14.02
620.712	13.99
621.051	13.98
621.389	13.95
621.728	13.93
622.067	13.92
622.405	13.91
622.744	13.9
623.082	13.9
623.42	13.88
623.759	13.88
624.097	13.86
624.435	13.87
624.774	13.85
625.112	13.86
625.45	13.86
625.788	13.84
626.126	13.83
626.464	13.82
626.802	13.8
627.14	13.78
627.478	13.76
627.816	13.75
628.154	13.73
628.491	13.71
628.829	13.68
629.167	13.67
629.504	13.66
629.842	13.66
630.179	13.66
630.517	13.66
630.854	13.66
631.192	13.67
631.529	13.68
631.866	13.67
632.204	13.69
632.541	13.71
632.878	13.72
633.215	13.72
633.552	13.72
633.889	13.72
634.226	13.71
634.563	13.7
634.9	13.68
635.237	13.66
635.574	13.65
635.911	13.64
636.247	13.62
636.584	13.61
636.921	13.61
637.257	13.6
637.594	13.58
637.93	13.57
638.267	13.57
638.603	13.56
638.939	13.55
639.276	13.52
639.612	13.51
639.948	13.5
640.285	13.48
640.621	13.45
640.957	13.42
641.293	13.4
641.629	13.38
641.965	13.35
642.301	13.32
642.637	13.3
642.973	13.28
643.308	13.25
643.644	13.21
643.98	13.18
644.315	13.14
644.651	13.11
644.987	13.06
645.322	13.01
645.658	12.97
645.993	12.93
646.329	12.9
646.664	12.87
646.999	12.83
647.334	12.81
647.67	12.76
648.005	12.72
648.34	12.67
648.675	12.63
649.01	12.6
649.345	12.55
649.68	12.5
650.015	12.47
650.35	12.39
650.685	12.36
651.019	12.3
651.354	12.27
651.689	12.22
652.023	12.17
652.358	12.12
652.693	12.09
653.027	12.07
653.361	12.06
653.696	12.02
654.03	12.01
654.365	11.98
654.699	11.94
655.033	11.93
655.367	11.92
655.701	11.93
656.035	11.92
656.369	11.89
656.703	11.85
657.037	11.82
657.371	11.8
657.705	11.77
658.039	11.71
658.373	11.66
658.707	11.61
659.04	11.56
659.374	11.48
659.707	11.41
660.041	11.34
660.374	11.25
660.708	11.18
661.041	11.11
661.375	11.04
661.708	11.02
662.041	11
662.374	10.95
662.708	10.89
663.041	10.84
663.374	10.79
663.707	10.75
664.04	10.72
664.373	10.66
664.706	10.59
665.039	10.52
665.371	10.44
665.704	10.35
666.037	10.29
666.37	10.2
666.702	10.14
667.035	10.06
667.367	10
667.7	9.94
668.032	9.87
668.365	9.8
668.697	9.74
669.029	9.67
669.362	9.59
669.694	9.51
670.026	9.43
670.358	9.34
670.69	9.26
671.022	9.17
671.354	9.1
671.686	9.03
672.018	8.98
672.35	8.92
672.682	8.87
673.013	8.83
673.345	8.77
673.677	8.76
674.008	8.74
674.34	8.7
674.671	8.68
675.003	8.65
675.334	8.64
675.666	8.6
675.997	8.56
676.328	8.52
676.659	8.48
676.991	8.45
677.322	8.39
677.653	8.32
677.984	8.28
678.315	8.22
678.646	8.14
678.977	8.07
679.308	7.97
679.639	7.9
679.969	7.81
680.3	7.71
680.631	7.6
680.961	7.48
681.292	7.4
681.622	7.3
681.953	7.2
682.283	7.14
682.614	7.05
682.944	7.02
683.274	6.98
683.605	6.95
683.935	6.92
684.265	6.89
684.595	6.88
684.925	6.86
685.255	6.87
685.585	6.86
685.915	6.84
686.245	6.86
686.575	6.8
686.905	6.74
687.234	6.66
687.564	6.59
687.894	6.53
688.223	6.46
688.553	6.37
688.882	6.28
689.212	6.19
689.541	6.07
689.871	5.95
690.2	5.87
690.529	5.79
690.858	5.73
691.187	5.66
691.517	5.58
691.846	5.55
692.175	5.48
692.504	5.4
692.833	5.36
693.162	5.33
693.49	5.27
693.819	5.25
694.148	5.19
694.477	5.16
694.805	5.13
695.134	5.1
695.462	5
695.791	4.95
696.119	4.91
696.448	4.86
696.776	4.77
697.104	4.69
697.433	4.55
697.761	4.46
698.089	4.36
698.417	4.22
698.745	4.1
699.073	3.96
699.401	3.78
699.729	3.57
700.057	3.34
700.385	3.19
700.713	3.03
701.04	2.91
701.368	2.79
701.696	2.68
702.023	2.59
702.351	2.51
702.678	2.45
703.006	2.4
703.333	2.35
703.661	2.3
703.988	2.21
704.315	2.15
704.642	2.04
704.969	1.98
705.297	1.85
705.624	1.71
705.951	1.55
706.278	1.35
706.604	1.14
706.931	1.01
707.258	0.84
707.585	0.71
707.912	0.56
708.238	0.4
708.565	0.2
708.892	-0.02
709.218	-0.22
709.545	-0.44
709.871	-0.64
710.197	-0.81
710.524	-1.05
710.85	-1.26
711.176	-1.51
711.502	-1.77
711.829	-1.98
712.155	-2.21
712.481	-2.41
712.807	-2.64
713.133	-2.86
713.458	-3.09
713.784	-3.33
714.11	-3.59
714.436	-3.8
714.762	-4.06
715.087	-4.28
715.413	-4.55
715.738	-4.77
716.064	-5.04
716.389	-5.3
716.715	-5.52
717.04	-5.74
717.365	-6.02
717.691	-6.27
718.016	-6.54
718.341	-6.78
718.666	-7.02
718.991	-7.24
719.316	-7.53
719.641	-7.83
719.966	-8.09
720.291	-8.37
720.616	-8.64
720.941	-8.92
721.265	-9.16
721.59	-9.41
721.915	-9.67
722.239	-9.94
722.564	-10.25
722.888	-10.52
723.213	-10.7
723.537	-10.96
723.861	-11.24
724.186	-11.49
724.51	-11.69
724.834	-12.02
725.158	-12.36
725.482	-12.69
725.806	-13.06
726.13	-13.34
726.454	-13.67
726.778	-13.97
727.102	-14.28
727.426	-14.63
727.749	-14.99
728.073	-15.38
728.397	-15.77
728.72	-16.1
729.044	-16.41
729.367	-16.75
729.691	-17.1
730.014	-17.44
730.337	-17.81
730.661	-18.15
730.984	-18.43
731.307	-18.8
731.63	-19.17
731.953	-19.43
732.276	-19.74
732.599	-20.02
732.922	-20.32
733.245	-20.61
733.568	-20.92
733.891	-21.31
734.213	-21.61
734.536	-21.92
734.859	-22.27
735.181	-22.55
735.504	-22.87
735.826	-23.24
736.149	-23.57
736.471	-23.89
736.793	-24.21
737.116	-24.56
737.438	-24.81
737.76	-25.17
738.082	-25.54
738.404	-25.78
738.726	-26.12
739.048	-26.4
739.37	-26.62
739.692	-27.06
740.014	-27.4
740.336	-27.74
740.658	-27.97
740.979	-28.24
741.301	-28.55
741.622	-28.85
741.944	-29.15
742.265	-29.38
742.587	-29.63
742.908	-29.93
743.23	-30.22
743.551	-30.48
743.872	-30.72
744.193	-31.13
744.514	-31.44
744.835	-31.71
745.156	-31.96
745.477	-32.34
745.798	-32.7
746.119	-33.05
746.44	-33.35
746.761	-33.6
747.081	-33.82
747.402	-34.15
747.723	-34.45
748.043	-34.75
748.364	-35.14
748.684	-35.41
749.005	-35.76
749.325	-36.07
749.645	-36.41
749.966	-36.63
750.286	-36.91
750.606	-37.35
750.926	-37.59
751.246	-37.79
751.566	-38.15
751.886	-38.38
752.206	-38.74
752.526	-38.94
752.846	-39.07
753.165	-39.3
753.485	-39.62
753.805	-39.86
754.124	-39.97
754.444	-40.23
754.763	-40.48
755.083	-40.57
755.402	-40.6
755.721	-40.73
756.041	-40.86
756.36	-41.2
756.679	-41.37
756.998	-41.65
757.317	-41.77
757.636	-41.9
757.955	-42.05
758.274	-42.22
758.593	-42.54
758.912	-42.89
759.231	-43.1
759.549	-43.4
759.868	-43.54
760.187	-43.83
760.505	-44.01
760.824	-44.29
761.142	-44.58
761.461	-44.88
761.779	-45.12
762.097	-45.29
762.416	-45.36
762.734	-45.53
763.052	-45.73
763.37	-45.99
763.688	-46.12
764.006	-46.4
764.324	-46.71
764.642	-47.01
764.96	-47.29
765.278	-47.43
765.595	-47.6
765.913	-47.85
766.231	-47.97
766.548	-47.89
766.866	-47.94
767.183	-48.08
767.501	-48.09
767.818	-48.09
768.135	-48.04
768.453	-48.06
768.77	-48.11
769.087	-48.17
769.404	-48.33
769.721	-48.54
770.038	-48.96
770.355	-49.25
770.672	-49.41
770.989	-49.57
771.306	-49.69
771.622	-49.87
771.939	-50.02
772.256	-50.24
772.572	-50.33
772.889	-50.39
773.205	-50.36
773.522	-50.43
773.838	-50.48
774.154	-50.66
774.471	-50.87
774.787	-51.11
775.103	-51.33
775.419	-51.46
775.735	-51.61
776.051	-51.89
776.367	-52.06
776.683	-52.33
776.999	-52.28
777.315	-52.18
777.63	-52.1
777.946	-52.22
778.262	-52.19
778.577	-52.23
778.893	-52.15
779.208	-52.14
779.524	-52.16
779.839	-51.93
780.155	-52.2
780.47	-52.33
780.785	-52.55
781.1	-52.75
781.415	-52.66
781.73	-52.75
782.045	-52.84
782.36	-53.17
782.675	-53.19
782.99	-53.13
783.305	-53.26
783.62	-53.19
783.934	-53.25
784.249	-53.39
784.564	-53.53
784.878	-53.53
785.193	-53.63
785.507	-53.6
785.821	-53.48
786.136	-53.55
786.45	-53.67
786.764	-53.89
787.078	-53.94
787.392	-54.16
787.706	-54.23
788.02	-54.28
788.334	-54.65
788.648	-54.73
788.962	-55.14
789.276	-55.55
789.59	-55.71
789.903	-55.92
790.217	-55.98
790.53	-55.85
790.844	-55.75
791.157	-55.65
791.471	-55.74
791.784	-55.77
792.097	-55.75
792.411	-55.63
792.724	-55.31
793.037	-55.24
793.35	-55.32
793.663	-55.31
793.976	-55.37
794.289	-55.46
794.602	-55.42
794.915	-55.44
795.228	-55.5
795.54	-55.66
795.853	-55.6
796.165	-55.85
796.478	-55.92
796.791	-55.73
797.103	-55.75
797.415	-55.67
797.728	-55.5
798.04	-55.75
798.352	-55.74
798.664	-55.47
798.976	-55.25
799.289	-55.19
799.601	-55.19
799.913	-55.07
800.224	-55.16
800.536	-55.17
800.848	-55.22
801.16	-55.45
801.471	-55.29
801.783	-55.27
802.095	-55.51
802.406	-55.67
802.718	-55.84
803.029	-55.81
803.34	-56.22
803.652	-56.18
803.963	-56.18
804.274	-56.4
804.585	-56.33
804.896	-56.61
805.207	-56.63
805.518	-56.54
805.829	-56.68
806.14	-56.68
806.451	-56.74
806.762	-56.48
807.072	-56.66
807.383	-56.52
807.694	-56.36
808.004	-56.49
808.315	-56.37
808.625	-56.12
808.936	-56.02
809.246	-55.89
809.556	-55.9
809.866	-55.78
810.177	-56.19
810.487	-56.19
810.797	-56.27
811.107	-56.36
811.417	-56.13
811.726	-56.13
812.036	-56.36
812.346	-56.45
812.656	-56.53
812.965	-56.53
813.275	-56.68
813.585	-56.47
813.894	-56.32
814.204	-56.61
814.513	-56.66
814.822	-56.89
815.132	-56.75
815.441	-56.75
815.75	-56.73
816.059	-56.97
816.368	-57.35
816.677	-57.44
816.986	-57.57
817.295	-57.77
817.604	-57.78
817.913	-57.85
818.221	-58.03
818.53	-58.48
818.839	-58.63
819.147	-58.77
819.456	-58.87
819.764	-58.58
820.073	-58.65
820.381	-58.32
820.689	-58.37
820.997	-58.41
821.306	-58.45
821.614	-58.41
821.922	-58.4
822.23	-58.34
822.538	-58.36
822.846	-58.32
823.153	-58.4
823.461	-58.08
823.769	-57.78
824.077	-57.43
824.384	-57.16
824.692	-57.01
824.999	-56.93
825.307	-56.76
825.614	-56.65
825.922	-56.56
826.229	-56.45
826.536	-56.29
826.843	-56.27
827.15	-56.27
827.457	-56.28
827.764	-56.41
828.071	-56.51
828.378	-56.54
828.685	-56.8
828.992	-57.11
829.299	-57.27
829.605	-57.59
829.912	-57.91
830.218	-57.98
830.525	-58.15
830.831	-58.21
831.138	-58.12
831.444	-58.15
831.75	-58.11
832.057	-58.1
832.363	-58.04
832.669	-58.18
832.975	-58.06
833.281	-58.24
833.587	-58.25
833.893	-58.14
834.199	-58.31
834.504	-58.23
834.81	-58.24
835.116	-58.72
835.421	-58.74
835.727	-58.69
836.032	-58.61
836.338	-58.6
836.643	-58.5
836.949	-58.4
837.254	-58.44
837.559	-58.44
837.864	-58.54
838.169	-58.37
838.474	-58.2
838.779	-58.14
839.084	-58.07
839.389	-58.13
839.694	-58.02
839.999	-57.82
840.303	-57.85
840.608	-57.94
840.913	-57.83
841.217	-57.98
841.522	-58.19
841.826	-58.39
842.13	-58.47
842.435	-58.63
842.739	-58.64
843.043	-58.98
843.347	-58.97
843.651	-59.17
843.955	-59.12
844.259	-59.15
844.563	-58.91
844.867	-58.77
845.171	-58.76
845.475	-58.71
845.778	-58.69
846.082	-59.17
846.385	-58.83
846.689	-58.86
846.992	-59.31
847.296	-59.49
847.599	-59.56
847.902	-60.07
848.206	-60.76
848.509	-60.52
848.812	-60.44
849.115	-60.38
849.418	-59.61
849.721	-59.62
850.024	-59.87
850.327	-59.87
850.629	-59.59
850.932	-59.33
851.235	-59.02
851.537	-58.3
851.84	-57.8
852.142	-57.91
852.445	-58.34
852.747	-58.87
853.049	-58.25
853.352	-58.31
853.654	-57.86
853.956	-58.35
854.258	-58.46
854.56	-58.05
854.862	-58.77
855.164	-59.37
855.466	-59.48
855.767	-58.9
856.069	-58.44
856.371	-59.48
856.672	-59.45
856.974	-59.87
857.275	-59.78
857.577	-59.89
857.878	-59.99
858.18	-59.82
858.481	-59.65
858.782	-59.69
859.083	-59.61
859.384	-59.71
859.685	-59.59
859.986	-59.84
860.287	-59.56
860.588	-59.86
860.889	-59.86
861.19	-60.16
861.49	-60.28
861.791	-60.27
862.092	-60.2
862.392	-60.79
862.693	-61.05
862.993	-60.67
863.293	-60.95
863.594	-60.79
863.894	-60.24
864.194	-60.26
864.494	-60.42
864.794	-59.74
865.094	-60.05
865.394	-60
865.694	-59.79
865.994	-59.64
866.293	-59.47
866.593	-59.19
866.893	-58.8
867.192	-58.64
867.492	-58.58
867.791	-58.59
868.091	-58.74
868.39	-58.39
868.689	-57.74
[truncated: 47 more rows]

## Sheet: Citmoc03
179.63	107.52
180.007	120.4
180.384	228.45
180.761	-537.2
181.138	-140.06
181.515	-83.87
181.892	-282.27
182.269	-12.09
182.646	454.69
183.023	292.6
183.4	513.13
183.777	38
184.154	168.06
184.53	3102.43
184.907	-52.26
185.284	-24.91
185.661	-1.1
186.038	40.62
186.414	-2.82
186.791	-17.83
187.168	-18.99
187.545	-17.67
187.921	-26.66
188.298	-21.29
188.675	-23.15
189.051	-18.95
189.428	-17.75
189.804	-13.18
190.181	-14.21
190.558	-14.72
190.934	-15.71
191.311	-15.06
191.687	-14.44
192.064	-8.86
192.44	-10.2
192.817	-8.71
193.193	-9.64
193.569	-8.24
193.946	-8.28
194.322	-7.97
194.698	-8.03
195.075	-4.34
195.451	-3.84
195.827	-6.15
196.203	-8.04
196.58	-9.24
196.956	-8.98
197.332	-7.46
197.708	-7.64
198.084	-8.49
198.461	-6.94
198.837	-5.46
199.213	-6.02
199.589	-7.31
199.965	-3.85
200.341	-4.87
200.717	-4.09
201.093	-4.01
201.469	-4.92
201.845	-5.32
202.221	-5.46
202.597	-6.54
202.972	-6.23
203.348	-6.82
203.724	-4.69
204.1	-6.33
204.476	-9.14
204.852	-8.84
205.227	-8.39
205.603	-6.58
205.979	-7.45
206.355	-8.59
206.73	-7.23
207.106	-10.21
207.481	-10.22
207.857	-10.33
208.233	-7.49
208.608	-4.66
208.984	-3.58
209.359	-5.16
209.735	-5.63
210.11	-3.94
210.486	-5.05
210.861	-6.38
211.237	-1.87
211.612	-1.43
211.987	-0.49
212.363	-4.39
212.738	-4.59
213.113	-6.85
213.489	-4.89
213.864	-4.07
214.239	-4.83
214.615	-1.83
214.99	-0.23
215.365	-2.67
215.74	-1.52
216.115	-2.25
216.49	-1.22
216.866	0.38
217.241	2.23
217.616	2.31
217.991	1.68
218.366	2.46
218.741	1.53
219.116	1.12
219.491	2.36
219.866	2.44
220.241	0.44
220.615	0.42
220.99	-0.27
221.365	-0.51
221.74	-1.14
222.115	-1.91
222.49	-2.37
222.864	-2.72
223.239	-4.07
223.614	-4.97
223.988	-4.8
224.363	-3.64
224.738	-3.77
225.112	-3.58
225.487	-2.81
225.862	-1.52
226.236	-1.26
226.611	-1.07
226.985	-1.25
227.36	-0.08
227.734	-0.25
228.109	-0.33
228.483	0.36
228.858	0.1
229.232	-0.54
229.606	-0.97
229.981	-1.36
230.355	-1.43
230.729	-1.36
231.104	-1.05
231.478	-1.11
231.852	-0.8
232.226	-1.07
232.601	-1.32
232.975	-1.18
233.349	-1
233.723	-1.11
234.097	-1.05
234.471	-0.8
234.845	-0.76
235.219	-0.8
235.593	-1
235.967	-1.04
236.341	-0.83
236.715	-0.72
237.089	-0.62
237.463	-0.37
237.837	-0.31
238.211	-0.4
238.585	-0.34
238.958	-0.55
239.332	-0.58
239.706	-0.38
240.08	-0.42
240.453	-0.47
240.827	-0.6
241.201	-0.66
241.575	-0.78
241.948	-0.87
242.322	-0.85
242.695	-0.96
243.069	-0.99
243.442	-1
243.816	-1.06
244.189	-1.1
244.563	-1.11
244.936	-1.18
245.31	-1.22
245.683	-1.28
246.057	-1.27
246.43	-1.34
246.803	-1.36
247.177	-1.35
247.55	-1.35
247.923	-1.38
248.296	-1.43
248.67	-1.46
249.043	-1.43
249.416	-1.41
249.789	-1.41
250.162	-1.44
250.535	-1.44
250.909	-1.44
251.282	-1.46
251.655	-1.51
252.028	-1.46
252.401	-1.47
252.774	-1.48
253.147	-1.49
253.52	-1.51
253.892	-1.51
254.265	-1.52
254.638	-1.5
255.011	-1.52
255.384	-1.52
255.757	-1.54
256.129	-1.62
256.502	-1.62
256.875	-1.63
257.247	-1.66
257.62	-1.67
257.993	-1.7
258.365	-1.69
258.738	-1.73
259.111	-1.75
259.483	-1.74
259.856	-1.7
260.228	-1.69
260.601	-1.69
260.973	-1.69
261.346	-1.67
261.718	-1.68
262.09	-1.68
262.463	-1.69
262.835	-1.7
263.207	-1.69
263.58	-1.7
263.952	-1.71
264.324	-1.74
264.696	-1.74
265.069	-1.76
265.441	-1.77
265.813	-1.78
266.185	-1.78
266.557	-1.74
266.929	-1.7
267.301	-1.66
267.673	-1.63
268.045	-1.63
268.417	-1.59
268.789	-1.6
269.161	-1.58
269.533	-1.59
269.905	-1.6
270.277	-1.61
270.649	-1.62
271.02	-1.64
271.392	-1.65
271.764	-1.63
272.136	-1.63
272.507	-1.62
272.879	-1.57
273.251	-1.54
273.622	-1.51
273.994	-1.46
274.366	-1.43
274.737	-1.45
275.109	-1.42
275.48	-1.4
275.852	-1.42
276.223	-1.38
276.595	-1.39
276.966	-1.38
277.338	-1.38
277.709	-1.39
278.08	-1.39
278.452	-1.37
278.823	-1.33
279.194	-1.33
279.565	-1.32
279.937	-1.31
280.308	-1.33
280.679	-1.32
281.05	-1.31
281.421	-1.34
281.792	-1.34
282.163	-1.34
282.535	-1.38
282.906	-1.37
283.277	-1.37
283.648	-1.35
284.018	-1.33
284.389	-1.31
284.76	-1.3
285.131	-1.31
285.502	-1.27
285.873	-1.26
286.244	-1.26
286.614	-1.26
286.985	-1.29
287.356	-1.27
287.727	-1.26
288.097	-1.28
288.468	-1.27
288.839	-1.26
289.209	-1.26
289.58	-1.27
289.95	-1.25
290.321	-1.26
290.691	-1.22
291.062	-1.21
291.432	-1.19
291.803	-1.2
292.173	-1.18
292.544	-1.18
292.914	-1.18
293.284	-1.17
293.655	-1.17
294.025	-1.19
294.395	-1.17
294.765	-1.18
295.135	-1.18
295.506	-1.21
295.876	-1.22
296.246	-1.24
296.616	-1.24
296.986	-1.25
297.356	-1.25
297.726	-1.25
298.096	-1.23
298.466	-1.23
298.836	-1.22
299.206	-1.21
299.576	-1.2
299.946	-1.19
300.316	-1.19
300.685	-1.2
301.055	-1.19
301.425	-1.2
301.795	-1.2
302.164	-1.23
302.534	-1.27
302.904	-1.31
303.273	-1.32
303.643	-1.33
304.013	-1.36
304.382	-1.35
304.752	-1.36
305.121	-1.37
305.491	-1.35
305.86	-1.36
306.23	-1.34
306.599	-1.31
306.968	-1.29
307.338	-1.3
307.707	-1.3
308.076	-1.28
308.446	-1.25
308.815	-1.25
309.184	-1.26
309.553	-1.28
309.922	-1.27
310.292	-1.29
310.661	-1.3
311.03	-1.33
311.399	-1.35
311.768	-1.37
312.137	-1.41
312.506	-1.44
312.875	-1.45
313.244	-1.48
313.613	-1.52
313.982	-1.57
314.35	-1.62
314.719	-1.67
315.088	-1.71
315.457	-1.76
315.826	-1.81
316.194	-1.91
316.563	-2.03
316.932	-2.14
317.3	-2.23
317.669	-2.28
318.037	-2.36
318.406	-2.43
318.775	-2.54
319.143	-2.64
319.512	-2.74
319.88	-2.86
320.248	-2.94
320.617	-2.99
320.985	-3.06
321.354	-3.11
321.722	-3.21
322.09	-3.27
322.458	-3.33
322.827	-3.35
323.195	-3.41
323.563	-3.45
323.931	-3.48
324.299	-3.49
324.667	-3.55
325.035	-3.58
325.404	-3.64
325.772	-3.66
326.14	-3.69
326.508	-3.72
326.875	-3.77
327.243	-3.81
327.611	-3.85
327.979	-3.9
328.347	-3.9
328.715	-3.91
329.083	-3.94
329.45	-3.99
329.818	-4.01
330.186	-4.08
330.553	-4.12
330.921	-4.14
331.289	-4.12
331.656	-4.13
332.024	-4.13
332.391	-4.17
332.759	-4.22
333.126	-4.25
333.494	-4.25
333.861	-4.28
334.229	-4.31
334.596	-4.3
334.963	-4.33
335.331	-4.39
335.698	-4.46
336.065	-4.52
336.432	-4.56
336.8	-4.6
337.167	-4.62
337.534	-4.65
337.901	-4.69
338.268	-4.68
338.635	-4.74
339.002	-4.74
339.369	-4.76
339.736	-4.77
340.103	-4.78
340.47	-4.82
340.837	-4.84
341.204	-4.88
341.571	-4.94
341.938	-4.98
342.304	-5.02
342.671	-5.04
343.038	-5.1
343.404	-5.16
343.771	-5.17
344.138	-5.2
344.504	-5.24
344.871	-5.27
345.238	-5.32
345.604	-5.32
345.971	-5.35
346.337	-5.39
346.704	-5.45
347.07	-5.47
347.436	-5.51
347.803	-5.55
348.169	-5.58
348.535	-5.62
348.902	-5.63
349.268	-5.66
349.634	-5.72
350	-5.76
350.366	-5.77
350.733	-5.8
351.099	-5.83
351.465	-5.84
351.831	-5.9
352.197	-5.93
352.563	-5.96
352.929	-6
353.295	-6.05
353.661	-6.07
354.027	-6.09
354.392	-6.12
354.758	-6.16
355.124	-6.18
355.49	-6.21
355.856	-6.21
356.221	-6.21
356.587	-6.22
356.953	-6.24
357.318	-6.24
357.684	-6.24
358.049	-6.25
358.415	-6.27
358.78	-6.28
359.146	-6.32
359.511	-6.33
359.877	-6.32
360.242	-6.32
360.608	-6.34
360.973	-6.33
361.338	-6.35
361.703	-6.37
362.069	-6.39
362.434	-6.4
362.799	-6.41
363.164	-6.4
363.529	-6.41
363.895	-6.43
364.26	-6.45
364.625	-6.45
364.99	-6.45
365.355	-6.46
365.72	-6.44
366.085	-6.45
366.449	-6.44
366.814	-6.43
367.179	-6.43
367.544	-6.43
367.909	-6.43
368.274	-6.41
368.638	-6.39
369.003	-6.37
369.368	-6.31
369.732	-6.3
370.097	-6.24
370.461	-6.23
370.826	-6.2
371.19	-6.15
371.555	-6.1
371.919	-6.03
372.284	-6
372.648	-5.98
373.013	-5.96
373.377	-5.94
373.741	-5.9
374.106	-5.88
374.47	-5.84
374.834	-5.8
375.198	-5.77
375.562	-5.73
375.927	-5.7
376.291	-5.63
376.655	-5.57
377.019	-5.5
377.383	-5.45
377.747	-5.39
378.111	-5.32
378.475	-5.29
378.839	-5.23
379.202	-5.18
379.566	-5.12
379.93	-5.07
380.294	-5.05
380.658	-5
381.021	-4.97
381.385	-4.91
381.749	-4.87
382.112	-4.82
382.476	-4.76
382.839	-4.73
383.203	-4.69
383.566	-4.64
383.93	-4.59
384.293	-4.55
384.657	-4.5
385.02	-4.45
385.384	-4.39
385.747	-4.34
386.11	-4.28
386.473	-4.22
386.837	-4.15
387.2	-4.09
387.563	-4.04
387.926	-3.98
388.289	-3.91
388.652	-3.86
389.015	-3.81
389.378	-3.77
389.741	-3.72
390.104	-3.66
390.467	-3.61
390.83	-3.57
391.193	-3.52
391.556	-3.46
391.919	-3.42
392.281	-3.37
392.644	-3.3
393.007	-3.25
393.37	-3.19
393.732	-3.12
394.095	-3.07
394.458	-3.02
394.82	-2.96
395.183	-2.9
395.545	-2.86
395.908	-2.79
396.27	-2.73
396.632	-2.69
396.995	-2.63
397.357	-2.57
397.719	-2.53
398.082	-2.47
398.444	-2.41
398.806	-2.36
399.168	-2.29
399.531	-2.22
399.893	-2.15
400.255	-2.09
400.617	-2.02
400.979	-1.96
401.341	-1.91
401.703	-1.85
402.065	-1.8
402.427	-1.73
402.789	-1.67
403.15	-1.6
403.512	-1.56
403.874	-1.51
404.236	-1.46
404.598	-1.41
404.959	-1.36
405.321	-1.3
405.683	-1.26
406.044	-1.22
406.406	-1.19
406.767	-1.16
407.129	-1.14
407.49	-1.09
407.852	-1.06
408.213	-1.03
408.574	-0.99
408.936	-0.96
409.297	-0.92
409.658	-0.87
410.02	-0.83
410.381	-0.8
410.742	-0.76
411.103	-0.71
411.464	-0.68
411.825	-0.62
412.186	-0.58
412.548	-0.55
412.909	-0.51
413.269	-0.5
413.63	-0.48
413.991	-0.45
414.352	-0.44
414.713	-0.41
415.074	-0.39
415.435	-0.36
415.795	-0.35
416.156	-0.34
416.517	-0.32
416.877	-0.3
417.238	-0.28
417.599	-0.27
417.959	-0.25
418.32	-0.21
418.68	-0.19
419.041	-0.16
419.401	-0.15
419.761	-0.14
420.122	-0.12
420.482	-0.11
420.842	-0.09
421.203	-0.08
421.563	-0.06
421.923	-0.04
422.283	-0.03
422.643	-0.02
423.004	-0.01
423.364	0.01
423.724	0.02
424.084	0.03
424.444	0.04
424.804	0.05
425.163	0.07
425.523	0.08
425.883	0.08
426.243	0.1
426.603	0.11
426.963	0.12
427.322	0.13
427.682	0.14
428.042	0.15
428.401	0.16
428.761	0.17
429.12	0.18
429.48	0.2
429.839	0.21
430.199	0.23
430.558	0.23
430.918	0.24
431.277	0.25
431.636	0.27
431.996	0.29
432.355	0.3
432.714	0.3
433.073	0.31
433.432	0.32
433.792	0.33
434.151	0.32
434.51	0.33
434.869	0.33
435.228	0.33
435.587	0.33
435.946	0.33
436.305	0.35
436.663	0.35
437.022	0.37
437.381	0.37
437.74	0.38
438.099	0.4
438.457	0.41
438.816	0.42
439.175	0.44
439.533	0.46
439.892	0.46
440.25	0.46
440.609	0.47
440.967	0.47
441.326	0.48
441.684	0.49
442.042	0.49
442.401	0.5
442.759	0.51
443.117	0.52
443.475	0.53
443.834	0.54
444.192	0.52
444.55	0.53
444.908	0.55
445.266	0.57
445.624	0.59
445.982	0.61
446.34	0.62
446.698	0.64
447.056	0.67
447.414	0.68
447.772	0.69
448.129	0.73
448.487	0.76
448.845	0.76
449.203	0.78
449.56	0.79
449.918	0.82
450.276	0.84
450.633	0.86
450.991	0.88
451.348	0.91
451.706	0.95
452.063	0.98
452.42	1
452.778	1.02
453.135	1.04
453.492	1.06
453.85	1.08
454.207	1.1
454.564	1.1
454.921	1.11
455.278	1.12
455.635	1.13
455.992	1.14
456.349	1.15
456.706	1.17
457.063	1.18
457.42	1.19
457.777	1.2
458.134	1.21
458.491	1.22
458.848	1.23
459.204	1.25
459.561	1.25
459.918	1.25
460.274	1.25
460.631	1.24
460.988	1.24
461.344	1.25
461.701	1.25
462.057	1.26
462.414	1.26
462.77	1.26
463.126	1.26
463.483	1.27
463.839	1.28
464.195	1.29
464.551	1.31
464.908	1.33
465.264	1.34
465.62	1.34
465.976	1.35
466.332	1.35
466.688	1.36
467.044	1.36
467.4	1.36
467.756	1.36
468.112	1.37
468.468	1.36
468.823	1.36
469.179	1.37
469.535	1.37
469.891	1.38
470.246	1.37
470.602	1.37
470.958	1.37
471.313	1.38
471.669	1.4
472.024	1.4
472.38	1.41
472.735	1.41
473.091	1.41
473.446	1.41
473.801	1.41
474.156	1.42
474.512	1.42
474.867	1.43
475.222	1.42
475.577	1.42
475.932	1.42
476.287	1.42
476.643	1.42
476.998	1.42
477.352	1.42
477.707	1.43
478.062	1.43
478.417	1.44
478.772	1.44
479.127	1.44
479.482	1.44
479.836	1.44
480.191	1.44
480.546	1.44
480.9	1.44
481.255	1.44
481.609	1.44
481.964	1.44
482.318	1.44
482.673	1.42
483.027	1.41
483.382	1.41
483.736	1.39
484.09	1.37
484.445	1.36
484.799	1.38
485.153	1.4
485.507	1.4
485.861	1.4
486.215	1.4
486.569	1.41
486.923	1.41
487.277	1.41
487.631	1.42
487.985	1.43
488.339	1.43
488.693	1.42
489.047	1.41
489.4	1.42
489.754	1.43
490.108	1.44
490.462	1.45
490.815	1.46
491.169	1.48
491.522	1.49
491.876	1.51
492.229	1.52
492.583	1.54
492.936	1.56
493.289	1.58
493.643	1.59
493.996	1.61
494.349	1.63
494.703	1.65
495.056	1.67
495.409	1.69
495.762	1.72
496.115	1.76
496.468	1.8
496.821	1.85
497.174	1.89
497.527	1.94
497.88	1.97
498.233	1.99
498.586	2.01
498.938	2.02
499.291	2.05
499.644	2.08
499.997	2.11
500.349	2.14
500.702	2.17
501.054	2.2
501.407	2.23
501.759	2.27
502.112	2.31
502.464	2.35
502.817	2.38
503.169	2.42
503.521	2.46
503.874	2.49
504.226	2.53
504.578	2.57
504.93	2.6
505.282	2.64
505.634	2.68
505.986	2.72
506.338	2.76
506.69	2.8
507.042	2.83
507.394	2.86
507.746	2.89
508.098	2.93
508.45	2.96
508.802	2.99
509.153	3.02
509.505	3.07
509.857	3.09
510.208	3.13
510.56	3.17
510.911	3.21
511.263	3.24
511.614	3.27
511.966	3.3
512.317	3.33
512.668	3.36
513.02	3.4
513.371	3.43
513.722	3.46
514.073	3.5
514.425	3.53
514.776	3.56
515.127	3.61
515.478	3.65
515.829	3.68
516.18	3.73
516.531	3.77
516.882	3.8
517.233	3.85
517.583	3.9
517.934	3.93
518.285	3.96
518.636	3.98
518.986	4
519.337	4.02
519.688	4.04
520.038	4.06
520.389	4.09
520.739	4.12
521.09	4.15
521.44	4.18
521.79	4.21
522.141	4.25
522.491	4.29
522.841	4.34
523.192	4.39
523.542	4.45
523.892	4.5
524.242	4.55
524.592	4.59
524.942	4.64
525.292	4.67
525.642	4.71
525.992	4.74
526.342	4.76
526.692	4.78
527.041	4.8
527.391	4.82
527.741	4.84
528.091	4.86
528.44	4.88
528.79	4.89
529.14	4.92
529.489	5.01
529.839	5.12
530.188	5.19
530.537	5.24
530.887	5.26
531.236	5.29
531.586	5.31
531.935	5.34
532.284	5.37
532.633	5.42
532.982	5.46
533.332	5.46
533.681	5.41
534.03	5.4
534.379	5.41
534.728	5.44
535.077	5.46
535.425	5.49
535.774	5.51
536.123	5.53
536.472	5.55
536.821	5.57
537.169	5.6
537.518	5.63
537.867	5.67
538.215	5.71
538.564	5.75
538.912	5.79
539.261	5.82
539.609	5.85
539.957	5.88
540.306	5.9
540.654	5.94
541.002	5.97
541.351	6
541.699	6.03
542.047	6.04
542.395	6.04
542.743	6.06
543.091	6.06
543.439	6.07
543.787	6.09
544.135	6.1
544.483	6.11
544.831	6.12
545.179	6.15
545.526	6.18
545.874	6.22
546.222	6.27
546.569	6.3
546.917	6.35
547.265	6.38
547.612	6.4
547.96	6.43
548.307	6.46
548.655	6.5
549.002	6.53
549.349	6.55
549.697	6.58
550.044	6.61
550.391	6.64
550.738	6.67
551.085	6.71
551.432	6.76
551.78	6.81
552.127	6.86
552.474	6.91
552.82	6.94
553.167	6.97
553.514	6.98
553.861	7
554.208	7.01
554.555	7.03
554.901	7.05
555.248	7.07
555.595	7.08
555.941	7.1
556.288	7.12
556.634	7.14
556.981	7.18
557.327	7.21
557.673	7.25
558.02	7.29
558.366	7.33
558.712	7.36
559.059	7.38
559.405	7.42
559.751	7.45
560.097	7.48
560.443	7.51
560.789	7.53
561.135	7.56
561.481	7.59
561.827	7.61
562.173	7.63
562.519	7.64
562.865	7.67
563.21	7.69
563.556	7.7
563.902	7.71
564.247	7.72
564.593	7.73
564.938	7.76
565.284	7.77
565.629	7.78
565.975	7.8
566.32	7.81
566.666	7.81
567.011	7.81
567.356	7.81
567.701	7.82
568.047	7.83
568.392	7.84
568.737	7.85
569.082	7.88
569.427	7.89
569.772	7.9
570.117	7.92
570.462	7.94
570.807	7.96
571.151	7.97
571.496	7.98
571.841	7.98
572.186	7.98
572.53	7.96
572.875	7.94
573.219	7.92
573.564	7.91
573.909	7.91
574.253	7.9
574.597	7.9
574.942	7.91
575.286	7.91
575.63	7.91
575.975	7.89
576.319	7.89
576.663	7.9
577.007	7.92
577.351	7.92
577.695	7.92
578.039	7.92
578.383	7.92
578.727	7.91
579.071	7.92
579.415	7.93
579.759	7.95
580.103	7.95
580.446	7.95
580.79	7.94
581.134	7.95
581.477	7.96
581.821	7.96
582.164	7.96
582.508	7.96
582.851	7.95
583.195	7.94
583.538	7.93
583.881	7.94
584.224	7.94
584.568	7.95
584.911	7.93
585.254	7.93
585.597	7.93
585.94	7.92
586.283	7.9
586.626	7.9
586.969	7.89
587.312	7.88
587.655	7.86
587.998	7.86
588.341	7.84
588.683	7.83
589.026	7.81
589.369	7.78
589.711	7.77
590.054	7.75
590.396	7.74
590.739	7.73
591.081	7.7
591.424	7.69
591.766	7.68
592.108	7.66
592.451	7.65
592.793	7.64
593.135	7.65
593.477	7.63
593.819	7.64
594.161	7.63
594.503	7.62
594.845	7.61
595.187	7.61
595.529	7.6
595.871	7.6
596.213	7.59
596.555	7.58
596.896	7.57
597.238	7.55
597.58	7.53
597.921	7.5
598.263	7.47
598.604	7.46
598.946	7.45
599.287	7.45
599.629	7.45
599.97	7.45
600.311	7.45
600.653	7.46
600.994	7.47
601.335	7.48
601.676	7.49
602.017	7.53
602.358	7.55
602.699	7.55
603.04	7.54
603.381	7.53
603.722	7.51
604.063	7.48
604.404	7.44
604.745	7.41
605.085	7.38
605.426	7.35
605.767	7.3
606.107	7.27
606.448	7.25
606.788	7.23
607.129	7.23
607.469	7.23
607.809	7.23
608.15	7.23
608.49	7.23
608.83	7.23
609.171	7.23
609.511	7.24
609.851	7.22
610.191	7.2
610.531	7.17
610.871	7.12
611.211	7.09
611.551	7.07
611.891	7.05
612.23	7.03
612.57	7.03
612.91	7.03
613.25	7.02
613.589	7.02
613.929	7.02
614.269	7.03
614.608	7.04
614.948	7.03
615.287	7.02
615.626	6.99
615.966	6.97
616.305	6.94
616.644	6.9
616.984	6.87
617.323	6.84
617.662	6.81
618.001	6.78
618.34	6.75
618.679	6.73
619.018	6.71
619.357	6.7
619.696	6.68
620.035	6.65
620.373	6.63
620.712	6.6
621.051	6.58
621.389	6.56
621.728	6.55
622.067	6.53
622.405	6.51
622.744	6.49
623.082	6.46
623.42	6.44
623.759	6.43
624.097	6.42
624.435	6.42
624.774	6.4
625.112	6.4
625.45	6.38
625.788	6.36
626.126	6.34
626.464	6.33
626.802	6.31
627.14	6.29
627.478	6.28
627.816	6.25
628.154	6.24
628.491	6.22
628.829	6.21
629.167	6.19
629.504	6.19
629.842	6.18
630.179	6.18
630.517	6.17
630.854	6.17
631.192	6.17
631.529	6.17
631.866	6.17
632.204	6.17
632.541	6.16
632.878	6.15
633.215	6.15
633.552	6.15
633.889	6.14
634.226	6.14
634.563	6.12
634.9	6.1
635.237	6.09
635.574	6.07
635.911	6.05
636.247	6.04
636.584	6.02
636.921	6
637.257	5.97
637.594	5.95
637.93	5.94
638.267	5.93
638.603	5.91
638.939	5.87
639.276	5.84
639.612	5.82
639.948	5.81
640.285	5.78
640.621	5.75
640.957	5.74
641.293	5.71
641.629	5.69
641.965	5.66
642.301	5.63
642.637	5.59
642.973	5.56
643.308	5.51
643.644	5.46
643.98	5.42
644.315	5.38
644.651	5.33
644.987	5.27
645.322	5.22
645.658	5.16
645.993	5.09
646.329	5.06
646.664	5
646.999	4.95
647.334	4.89
647.67	4.84
648.005	4.8
648.34	4.73
648.675	4.68
649.01	4.64
649.345	4.6
649.68	4.57
650.015	4.53
650.35	4.48
650.685	4.45
651.019	4.41
651.354	4.36
651.689	4.3
652.023	4.26
652.358	4.21
652.693	4.15
653.027	4.1
653.361	4.05
653.696	4
654.03	3.96
654.365	3.9
654.699	3.85
655.033	3.81
655.367	3.79
655.701	3.76
656.035	3.74
656.369	3.72
656.703	3.68
657.037	3.64
657.371	3.61
657.705	3.57
658.039	3.54
658.373	3.5
658.707	3.46
659.04	3.4
659.374	3.32
659.707	3.26
660.041	3.17
660.374	3.09
660.708	3
661.041	2.92
661.375	2.84
661.708	2.77
662.041	2.7
662.374	2.63
662.708	2.56
663.041	2.5
663.374	2.43
663.707	2.37
664.04	2.32
664.373	2.27
664.706	2.21
665.039	2.16
665.371	2.1
665.704	2.05
666.037	1.98
666.37	1.91
666.702	1.84
667.035	1.77
667.367	1.7
667.7	1.64
668.032	1.56
668.365	1.48
668.697	1.41
669.029	1.32
669.362	1.26
669.694	1.18
670.026	1.11
670.358	1.04
670.69	0.95
671.022	0.88
671.354	0.82
671.686	0.76
672.018	0.7
672.35	0.63
672.682	0.6
673.013	0.54
673.345	0.51
673.677	0.49
674.008	0.49
674.34	0.49
674.671	0.49
675.003	0.48
675.334	0.48
675.666	0.48
675.997	0.49
676.328	0.49
676.659	0.5
676.991	0.49
677.322	0.5
677.653	0.48
677.984	0.45
678.315	0.41
678.646	0.38
678.977	0.34
679.308	0.3
679.639	0.25
679.969	0.19
680.3	0.13
680.631	0.04
680.961	-0.07
681.292	-0.17
681.622	-0.27
681.953	-0.34
682.283	-0.42
682.614	-0.5
682.944	-0.54
683.274	-0.55
683.605	-0.56
683.935	-0.54
684.265	-0.51
684.595	-0.45
684.925	-0.38
685.255	-0.29
685.585	-0.22
685.915	-0.14
686.245	-0.04
686.575	0.02
686.905	0.07
687.234	0.09
687.564	0.06
687.894	0.04
688.223	0.03
688.553	0
688.882	-0.05
689.212	-0.1
689.541	-0.18
689.871	-0.26
690.2	-0.34
690.529	-0.45
690.858	-0.54
691.187	-0.6
691.517	-0.68
691.846	-0.74
692.175	-0.81
692.504	-0.89
692.833	-0.94
693.162	-0.98
693.49	-1.04
693.819	-1.08
694.148	-1.12
694.477	-1.15
694.805	-1.21
695.134	-1.26
695.462	-1.34
695.791	-1.41
696.119	-1.49
696.448	-1.57
696.776	-1.66
697.104	-1.75
697.433	-1.86
697.761	-1.96
698.089	-2.1
698.417	-2.22
698.745	-2.39
699.073	-2.58
699.401	-2.83
699.729	-3.11
700.057	-3.39
700.385	-3.6
700.713	-3.84
701.04	-4.03
701.368	-4.22
701.696	-4.37
702.023	-4.49
702.351	-4.59
702.678	-4.68
703.006	-4.77
703.333	-4.81
703.661	-4.85
703.988	-4.94
704.315	-4.94
704.642	-5.03
704.969	-5.1
705.297	-5.2
705.624	-5.34
705.951	-5.48
706.278	-5.66
706.604	-5.84
706.931	-6
707.258	-6.2
707.585	-6.37
707.912	-6.6
708.238	-6.79
708.565	-6.98
708.892	-7.22
709.218	-7.44
709.545	-7.68
709.871	-7.92
710.197	-8.13
710.524	-8.37
710.85	-8.61
711.176	-8.88
711.502	-9.12
711.829	-9.36
712.155	-9.61
712.481	-9.83
712.807	-10.09
713.133	-10.3
713.458	-10.51
713.784	-10.74
714.11	-11.01
714.436	-11.24
714.762	-11.52
715.087	-11.78
715.413	-12.05
715.738	-12.32
716.064	-12.62
716.389	-12.91
716.715	-13.24
717.04	-13.54
717.365	-13.9
717.691	-14.2
718.016	-14.52
718.341	-14.76
718.666	-15.08
718.991	-15.36
719.316	-15.65
719.641	-15.98
719.966	-16.26
720.291	-16.54
720.616	-16.83
720.941	-17.09
721.265	-17.41
721.59	-17.65
721.915	-17.91
722.239	-18.19
722.564	-18.52
722.888	-18.78
723.213	-19.01
723.537	-19.28
723.861	-19.57
724.186	-19.83
724.51	-20.08
724.834	-20.36
725.158	-20.72
725.482	-21.14
725.806	-21.53
726.13	-21.82
726.454	-22.25
726.778	-22.56
727.102	-22.96
727.426	-23.34
727.749	-23.72
728.073	-24.13
728.397	-24.51
728.72	-24.89
729.044	-25.28
729.367	-25.63
729.691	-26.03
730.014	-26.33
730.337	-26.67
730.661	-27.01
730.984	-27.31
731.307	-27.69
731.63	-28.07
731.953	-28.38
732.276	-28.72
732.599	-28.96
732.922	-29.28
733.245	-29.58
733.568	-29.94
733.891	-30.37
734.213	-30.76
734.536	-31.09
734.859	-31.51
735.181	-31.82
735.504	-32.22
735.826	-32.62
736.149	-33.03
736.471	-33.43
736.793	-33.81
737.116	-34.2
737.438	-34.5
737.76	-34.81
738.082	-35.24
738.404	-35.49
738.726	-35.91
739.048	-36.23
739.37	-36.52
739.692	-36.91
740.014	-37.2
740.336	-37.51
740.658	-37.76
740.979	-38
741.301	-38.28
741.622	-38.54
741.944	-38.84
742.265	-39.06
742.587	-39.28
742.908	-39.54
743.23	-39.88
743.551	-40.14
743.872	-40.49
744.193	-40.93
744.514	-41.33
744.835	-41.71
745.156	-42.05
745.477	-42.47
745.798	-42.86
746.119	-43.23
746.44	-43.63
746.761	-43.89
747.081	-44.15
747.402	-44.53
747.723	-44.81
748.043	-45.16
748.364	-45.51
748.684	-45.83
749.005	-46.24
749.325	-46.57
749.645	-46.95
749.966	-47.19
750.286	-47.51
750.606	-48.04
750.926	-48.17
751.246	-48.46
751.566	-48.84
751.886	-49.2
752.206	-49.52
752.526	-49.78
752.846	-49.95
753.165	-50.26
753.485	-50.62
753.805	-50.84
754.124	-50.96
754.444	-51.29
754.763	-51.6
755.083	-51.81
755.402	-51.82
755.721	-52.04
756.041	-52.15
756.36	-52.55
756.679	-52.7
756.998	-52.92
757.317	-53.14
757.636	-53.4
757.955	-53.58
758.274	-53.8
758.593	-54.02
758.912	-54.4
759.231	-54.56
759.549	-54.91
759.868	-55.03
760.187	-55.44
760.505	-55.61
760.824	-55.86
761.142	-56.03
761.461	-56.31
761.779	-56.46
762.097	-56.6
762.416	-56.72
762.734	-56.99
763.052	-57.21
763.37	-57.51
763.688	-57.57
764.006	-57.86
764.324	-58.13
764.642	-58.35
764.96	-58.59
765.278	-58.74
765.595	-58.97
765.913	-59.15
766.231	-59.27
766.548	-59.21
766.866	-59.36
767.183	-59.53
767.501	-59.6
767.818	-59.72
768.135	-59.79
768.453	-59.97
768.77	-60.15
769.087	-60.31
769.404	-60.66
769.721	-61.05
770.038	-61.52
770.355	-61.75
770.672	-61.92
770.989	-62.09
771.306	-62.14
771.622	-62.5
771.939	-62.67
772.256	-62.9
772.572	-62.99
772.889	-62.97
773.205	-62.84
773.522	-62.87
773.838	-62.87
774.154	-63.2
774.471	-63.49
774.787	-63.92
775.103	-63.99
775.419	-64.19
775.735	-64.38
776.051	-64.73
776.367	-64.93
776.683	-65.26
776.999	-65.35
777.315	-65.35
777.63	-65.22
777.946	-65.32
778.262	-65.19
778.577	-65.32
778.893	-65.18
779.208	-65.14
779.524	-65.04
779.839	-64.88
780.155	-65.07
780.47	-65.24
780.785	-65.5
781.1	-65.68
781.415	-65.7
781.73	-65.92
782.045	-65.97
782.36	-66.31
782.675	-66.5
782.99	-66.58
783.305	-66.72
783.62	-66.72
783.934	-66.79
784.249	-66.9
784.564	-67.12
784.878	-67.14
785.193	-67.26
785.507	-67.27
785.821	-67.07
786.136	-66.9
786.45	-66.95
786.764	-66.99
787.078	-67.07
787.392	-67.11
787.706	-67.35
788.02	-67.3
788.334	-67.61
788.648	-67.64
788.962	-67.99
789.276	-68.26
789.59	-68.52
789.903	-68.86
790.217	-68.97
790.53	-68.77
790.844	-68.78
791.157	-68.53
791.471	-68.54
791.784	-68.62
792.097	-68.64
792.411	-68.62
792.724	-68.44
793.037	-68.5
793.35	-68.56
793.663	-68.71
793.976	-68.88
794.289	-69.05
794.602	-69.11
794.915	-69.12
795.228	-69.12
795.54	-69.21
795.853	-68.96
796.165	-69.13
796.478	-69.12
796.791	-68.91
797.103	-68.75
797.415	-68.69
797.728	-68.42
798.04	-68.66
798.352	-68.6
798.664	-68.25
798.976	-68.06
799.289	-68.05
799.601	-68.24
799.913	-68.12
800.224	-68.04
800.536	-68.13
800.848	-68.26
801.16	-68.56
801.471	-68.48
801.783	-68.67
802.095	-69.06
802.406	-69.34
802.718	-69.78
803.029	-69.76
803.34	-70.13
803.652	-70.28
803.963	-70.5
804.274	-70.56
804.585	-70.5
804.896	-70.73
805.207	-70.74
805.518	-70.74
805.829	-70.81
806.14	-70.64
806.451	-70.69
806.762	-70.41
807.072	-70.51
807.383	-70.12
807.694	-69.85
808.004	-69.81
808.315	-69.53
808.625	-69.27
808.936	-68.95
809.246	-68.8
809.556	-68.87
809.866	-68.77
810.177	-69.09
810.487	-69.18
810.797	-69.4
811.107	-69.6
811.417	-69.42
811.726	-69.57
812.036	-69.79
812.346	-70.03
812.656	-69.98
812.965	-70.06
813.275	-70
813.585	-69.97
813.894	-69.9
814.204	-70.22
814.513	-70.29
814.822	-70.73
815.132	-70.6
815.441	-70.62
815.75	-70.55
816.059	-70.97
816.368	-71.23
816.677	-71.63
816.986	-71.55
817.295	-71.73
817.604	-71.62
817.913	-71.53
818.221	-71.4
818.53	-71.76
818.839	-71.93
819.147	-71.98
819.456	-71.95
819.764	-71.58
820.073	-71.55
820.381	-71.39
820.689	-71.53
820.997	-71.67
821.306	-71.81
821.614	-71.9
821.922	-72.01
822.23	-71.81
822.538	-71.79
822.846	-71.76
823.153	-71.65
823.461	-70.79
823.769	-69.78
824.077	-68.83
824.384	-68.14
824.692	-67.87
824.999	-67.83
825.307	-67.74
825.614	-67.74
825.922	-67.75
826.229	-67.69
826.536	-67.64
826.843	-67.76
827.15	-68.01
827.457	-68.36
827.764	-68.95
828.071	-69.43
828.378	-69.68
828.685	-69.93
828.992	-70.11
829.299	-70.14
829.605	-70.34
829.912	-70.57
830.218	-70.66
830.525	-70.82
830.831	-70.95
831.138	-70.86
831.444	-71.01
831.75	-71.07
832.057	-71.26
832.363	-71.56
832.669	-71.95
832.975	-72.19
833.281	-72.55
833.587	-72.79
833.893	-72.76
834.199	-72.88
834.504	-72.81
834.81	-72.59
835.116	-72.9
835.421	-72.65
835.727	-72.36
836.032	-72.13
836.338	-72.01
836.643	-71.86
836.949	-71.64
837.254	-71.66
837.559	-71.59
837.864	-71.71
838.169	-71.65
838.474	-71.62
838.779	-71.87
839.084	-72
839.389	-72.4
839.694	-72.45
839.999	-72.46
840.303	-72.69
840.608	-72.96
840.913	-73.04
841.217	-73.16
841.522	-73.17
841.826	-73.17
842.13	-72.89
842.435	-72.83
842.739	-72.55
843.043	-72.77
843.347	-72.79
843.651	-73
843.955	-73
844.259	-73.28
844.563	-73.3
844.867	-73.33
845.171	-73.54
845.475	-73.62
845.778	-73.8
846.082	-74.5
846.385	-74.76
846.689	-74.64
846.992	-75.09
847.296	-75.09
847.599	-74.82
847.902	-74.98
848.206	-75.69
848.509	-75.11
848.812	-75
849.115	-75.07
849.418	-74.48
849.721	-74.38
850.024	-75.06
850.327	-75.33
850.629	-75.06
850.932	-74.94
851.235	-74.79
851.537	-74.13
851.84	-73.79
852.142	-74.06
852.445	-74.55
852.747	-74.94
853.049	-74.08
853.352	-73.99
853.654	-73.51
853.956	-74.02
854.258	-73.92
854.56	-73.73
854.862	-74.54
855.164	-75.76
855.466	-76.08
855.767	-75.74
856.069	-75.45
856.371	-76.06
856.672	-75.8
856.974	-75.9
857.275	-75.52
857.577	-75.6
857.878	-75.55
858.18	-74.98
858.481	-74.2
858.782	-74.29
859.083	-73.84
859.384	-74.04
859.685	-74.32
859.986	-74.58
860.287	-74.15
860.588	-74.76
860.889	-74.79
861.19	-75.06
861.49	-75.44
861.791	-75.69
862.092	-75.03
862.392	-75.87
862.693	-75.77
862.993	-75.41
863.293	-75.58
863.594	-75.77
863.894	-75.43
864.194	-75.75
864.494	-75.58
864.794	-74.87
865.094	-74.9
865.394	-75.33
865.694	-74.8
865.994	-74.86
866.293	-74.51
866.593	-74.8
866.893	-74.33
867.192	-74.4
867.492	-74.19
867.791	-73.98
868.091	-74.1
868.39	-73.76
868.689	-72.99
[truncated: 47 more rows]

## Sheet: Citmoc04
179.63	-16.74
180.007	-138.27
180.384	-170.55
180.761	632.23
181.138	319.4
181.515	294.35
181.892	618.87
182.269	413.59
182.646	-3780.21
183.023	-235.2
183.4	-381.25
183.777	98.11
184.154	29.63
184.53	36.81
184.907	63.22
185.284	170.2
185.661	102.33
186.038	-3.69
186.414	25.41
186.791	12.71
187.168	10.5
187.545	6.9
187.921	6.32
188.298	8.88
188.675	9.24
189.051	8.88
189.428	6.4
189.804	7.48
190.181	8.72
190.558	5.32
190.934	3.88
191.311	4.37
191.687	4.92
192.064	5.57
192.44	2.7
192.817	3.11
193.193	3.75
193.569	4.36
193.946	2.24
194.322	1.02
194.698	0.37
195.075	1.24
195.451	-0.51
195.827	-0.37
196.203	-0.74
196.58	-0.88
196.956	-2.78
197.332	-1.56
197.708	-1.93
198.084	-1.92
198.461	-2.72
198.837	-1.72
199.213	0.23
199.589	1.86
199.965	3.8
200.341	2.33
200.717	2.78
201.093	3.22
201.469	1.34
201.845	3.38
202.221	2.1
202.597	1.27
202.972	2.07
203.348	0.87
203.724	1.76
204.1	-0.53
204.476	-1.27
204.852	-0.36
205.227	0.98
205.603	2.25
205.979	0.35
206.355	-0.91
206.73	0.34
207.106	-0.59
207.481	-1.43
207.857	-3.22
208.233	-1.83
208.608	-1.51
208.984	-1.86
209.359	-2.95
209.735	-4.32
210.11	-3.78
210.486	-2.27
210.861	-2.09
211.237	-1.37
211.612	1.19
211.987	3.32
212.363	1.19
212.738	2.97
213.113	3.86
213.489	5.94
213.864	6.66
214.239	5.16
214.615	6.69
214.99	6.72
215.365	6.51
215.74	6.62
216.115	4.36
216.49	3.47
216.866	4.91
217.241	4.86
217.616	4.08
217.991	4.61
218.366	6.49
218.741	4.92
219.116	4.45
219.491	2.77
219.866	1.2
220.241	0.56
220.615	2.89
220.99	-0.23
221.365	-0.35
221.74	-0.56
222.115	-1.25
222.49	-1.57
222.864	-0.99
223.239	-1.31
223.614	-0.01
223.988	2.05
224.363	3.16
224.738	2.14
225.112	3
225.487	3.04
225.862	2.57
226.236	2.52
226.611	2.49
226.985	2.16
227.36	2.6
227.734	2.43
228.109	0.68
228.483	0.47
228.858	0.51
229.232	0.05
229.606	-0.33
229.981	-0.58
230.355	-0.58
230.729	-0.72
231.104	-0.7
231.478	-0.8
231.852	-0.65
232.226	-0.75
232.601	-0.87
232.975	-0.96
233.349	-0.91
233.723	-1
234.097	-0.85
234.471	-0.75
234.845	-0.65
235.219	-0.68
235.593	-0.92
235.967	-0.98
236.341	-0.86
236.715	-0.72
237.089	-0.65
237.463	-0.48
237.837	-0.48
238.211	-0.64
238.585	-0.78
238.958	-0.96
239.332	-1
239.706	-0.84
240.08	-0.81
240.453	-0.87
240.827	-1.08
241.201	-1.02
241.575	-1.07
241.948	-1.11
242.322	-1.06
242.695	-1.05
243.069	-1.12
243.442	-1.17
243.816	-1.28
244.189	-1.36
244.563	-1.33
244.936	-1.33
245.31	-1.38
245.683	-1.42
246.057	-1.45
246.43	-1.53
246.803	-1.62
247.177	-1.64
247.55	-1.64
247.923	-1.65
248.296	-1.7
248.67	-1.76
249.043	-1.75
249.416	-1.77
249.789	-1.79
250.162	-1.81
250.535	-1.8
250.909	-1.79
251.282	-1.81
251.655	-1.85
252.028	-1.84
252.401	-1.84
252.774	-1.83
253.147	-1.85
253.52	-1.84
253.892	-1.83
254.265	-1.83
254.638	-1.81
255.011	-1.84
255.384	-1.82
255.757	-1.85
256.129	-1.89
256.502	-1.89
256.875	-1.87
257.247	-1.88
257.62	-1.91
257.993	-1.94
258.365	-1.94
258.738	-2
259.111	-2.03
259.483	-2.06
259.856	-2.09
260.228	-2.07
260.601	-2.08
260.973	-2.1
261.346	-2.1
261.718	-2.1
262.09	-2.09
262.463	-2.1
262.835	-2.11
263.207	-2.1
263.58	-2.11
263.952	-2.09
264.324	-2.09
264.696	-2.1
265.069	-2.11
265.441	-2.1
265.813	-2.1
266.185	-2.11
266.557	-2.07
266.929	-2.02
267.301	-1.99
267.673	-1.97
268.045	-1.94
268.417	-1.9
268.789	-1.91
269.161	-1.88
269.533	-1.89
269.905	-1.86
270.277	-1.87
270.649	-1.88
271.02	-1.89
271.392	-1.85
271.764	-1.84
272.136	-1.88
272.507	-1.88
272.879	-1.85
273.251	-1.84
273.622	-1.85
273.994	-1.85
274.366	-1.83
274.737	-1.84
275.109	-1.8
275.48	-1.84
275.852	-1.81
276.223	-1.78
276.595	-1.77
276.966	-1.76
277.338	-1.75
277.709	-1.74
278.08	-1.73
278.452	-1.72
278.823	-1.68
279.194	-1.68
279.565	-1.66
279.937	-1.69
280.308	-1.69
280.679	-1.7
281.05	-1.69
281.421	-1.68
281.792	-1.66
282.163	-1.67
282.535	-1.69
282.906	-1.7
283.277	-1.7
283.648	-1.69
284.018	-1.65
284.389	-1.63
284.76	-1.64
285.131	-1.62
285.502	-1.6
285.873	-1.6
286.244	-1.6
286.614	-1.6
286.985	-1.59
287.356	-1.59
287.727	-1.57
288.097	-1.57
288.468	-1.59
288.839	-1.57
289.209	-1.58
289.58	-1.6
289.95	-1.6
290.321	-1.6
290.691	-1.59
291.062	-1.58
291.432	-1.59
291.803	-1.62
292.173	-1.62
292.544	-1.61
292.914	-1.6
293.284	-1.59
293.655	-1.58
294.025	-1.59
294.395	-1.57
294.765	-1.55
295.135	-1.54
295.506	-1.55
295.876	-1.57
296.246	-1.58
296.616	-1.57
296.986	-1.58
297.356	-1.58
297.726	-1.59
298.096	-1.58
298.466	-1.57
298.836	-1.6
299.206	-1.6
299.576	-1.6
299.946	-1.59
300.316	-1.59
300.685	-1.61
301.055	-1.6
301.425	-1.63
301.795	-1.61
302.164	-1.63
302.534	-1.67
302.904	-1.67
303.273	-1.68
303.643	-1.66
304.013	-1.68
304.382	-1.66
304.752	-1.67
305.121	-1.69
305.491	-1.69
305.86	-1.72
306.23	-1.72
306.599	-1.72
306.968	-1.74
307.338	-1.72
307.707	-1.74
308.076	-1.72
308.446	-1.71
308.815	-1.7
309.184	-1.7
309.553	-1.71
309.922	-1.7
310.292	-1.73
310.661	-1.69
311.03	-1.71
311.399	-1.75
311.768	-1.77
312.137	-1.81
312.506	-1.84
312.875	-1.86
313.244	-1.89
313.613	-1.93
313.982	-1.96
314.35	-1.97
314.719	-2.05
315.088	-2.09
315.457	-2.14
315.826	-2.18
316.194	-2.27
316.563	-2.37
316.932	-2.46
317.3	-2.55
317.669	-2.6
318.037	-2.69
318.406	-2.75
318.775	-2.83
319.143	-2.93
319.512	-3.02
319.88	-3.15
320.248	-3.25
320.617	-3.28
320.985	-3.36
321.354	-3.4
321.722	-3.48
322.09	-3.58
322.458	-3.67
322.827	-3.7
323.195	-3.74
323.563	-3.8
323.931	-3.79
324.299	-3.78
324.667	-3.83
325.035	-3.87
325.404	-3.93
325.772	-3.95
326.14	-3.96
326.508	-3.99
326.875	-4.06
327.243	-4.11
327.611	-4.15
327.979	-4.2
328.347	-4.21
328.715	-4.24
329.083	-4.24
329.45	-4.28
329.818	-4.33
330.186	-4.35
330.553	-4.4
330.921	-4.4
331.289	-4.4
331.656	-4.38
332.024	-4.41
332.391	-4.44
332.759	-4.47
333.126	-4.53
333.494	-4.56
333.861	-4.59
334.229	-4.63
334.596	-4.62
334.963	-4.65
335.331	-4.67
335.698	-4.76
336.065	-4.8
336.432	-4.85
336.8	-4.89
337.167	-4.9
337.534	-4.91
337.901	-4.92
338.268	-4.93
338.635	-4.99
339.002	-4.99
339.369	-5.03
339.736	-5.03
340.103	-5.05
340.47	-5.08
340.837	-5.12
341.204	-5.18
341.571	-5.24
341.938	-5.28
342.304	-5.33
342.671	-5.34
343.038	-5.38
343.404	-5.43
343.771	-5.44
344.138	-5.46
344.504	-5.49
344.871	-5.53
345.238	-5.56
345.604	-5.59
345.971	-5.62
346.337	-5.66
346.704	-5.7
347.07	-5.74
347.436	-5.79
347.803	-5.84
348.169	-5.88
348.535	-5.93
348.902	-5.94
349.268	-5.95
349.634	-5.98
350	-5.98
350.366	-6
350.733	-6.04
351.099	-6.04
351.465	-6.05
351.831	-6.08
352.197	-6.13
352.563	-6.13
352.929	-6.14
353.295	-6.19
353.661	-6.2
354.027	-6.24
354.392	-6.26
354.758	-6.28
355.124	-6.33
355.49	-6.36
355.856	-6.36
356.221	-6.36
356.587	-6.36
356.953	-6.4
357.318	-6.39
357.684	-6.41
358.049	-6.4
358.415	-6.4
358.78	-6.4
359.146	-6.4
359.511	-6.4
359.877	-6.39
360.242	-6.4
360.608	-6.4
360.973	-6.38
361.338	-6.4
361.703	-6.41
362.069	-6.43
362.434	-6.43
362.799	-6.43
363.164	-6.44
363.529	-6.42
363.895	-6.43
364.26	-6.44
364.625	-6.44
364.99	-6.44
365.355	-6.42
365.72	-6.4
366.085	-6.39
366.449	-6.37
366.814	-6.36
367.179	-6.35
367.544	-6.34
367.909	-6.33
368.274	-6.3
368.638	-6.28
369.003	-6.26
369.368	-6.21
369.732	-6.19
370.097	-6.14
370.461	-6.11
370.826	-6.08
371.19	-6.03
371.555	-6
371.919	-5.94
372.284	-5.91
372.648	-5.88
373.013	-5.86
373.377	-5.83
373.741	-5.81
374.106	-5.8
374.47	-5.77
374.834	-5.73
375.198	-5.69
375.562	-5.64
375.927	-5.6
376.291	-5.56
376.655	-5.5
377.019	-5.44
377.383	-5.38
377.747	-5.31
378.111	-5.25
378.475	-5.19
378.839	-5.15
379.202	-5.1
379.566	-5.05
379.93	-5.01
380.294	-4.95
380.658	-4.9
381.021	-4.86
381.385	-4.81
381.749	-4.77
382.112	-4.71
382.476	-4.65
382.839	-4.59
383.203	-4.55
383.566	-4.5
383.93	-4.45
384.293	-4.4
384.657	-4.36
385.02	-4.3
385.384	-4.25
385.747	-4.21
386.11	-4.17
386.473	-4.1
386.837	-4.04
387.2	-3.99
387.563	-3.93
387.926	-3.87
388.289	-3.81
388.652	-3.76
389.015	-3.71
389.378	-3.65
389.741	-3.58
390.104	-3.54
390.467	-3.48
390.83	-3.43
391.193	-3.37
391.556	-3.31
391.919	-3.26
392.281	-3.19
392.644	-3.12
393.007	-3.06
393.37	-3.01
393.732	-2.95
394.095	-2.88
394.458	-2.83
394.82	-2.78
395.183	-2.72
395.545	-2.67
395.908	-2.61
396.27	-2.56
396.632	-2.52
396.995	-2.47
397.357	-2.42
397.719	-2.37
398.082	-2.32
398.444	-2.27
398.806	-2.21
399.168	-2.15
399.531	-2.11
399.893	-2.05
400.255	-1.98
400.617	-1.92
400.979	-1.87
401.341	-1.82
401.703	-1.76
402.065	-1.72
402.427	-1.66
402.789	-1.62
403.15	-1.56
403.512	-1.52
403.874	-1.49
404.236	-1.45
404.598	-1.39
404.959	-1.35
405.321	-1.31
405.683	-1.28
406.044	-1.23
406.406	-1.2
406.767	-1.18
407.129	-1.16
407.49	-1.11
407.852	-1.08
408.213	-1.05
408.574	-1.03
408.936	-1
409.297	-0.97
409.658	-0.92
410.02	-0.9
410.381	-0.87
410.742	-0.83
411.103	-0.79
411.464	-0.77
411.825	-0.73
412.186	-0.7
412.548	-0.68
412.909	-0.65
413.269	-0.63
413.63	-0.62
413.991	-0.61
414.352	-0.6
414.713	-0.58
415.074	-0.58
415.435	-0.54
415.795	-0.52
416.156	-0.51
416.517	-0.48
416.877	-0.47
417.238	-0.45
417.599	-0.43
417.959	-0.41
418.32	-0.39
418.68	-0.37
419.041	-0.36
419.401	-0.35
419.761	-0.35
420.122	-0.34
420.482	-0.32
420.842	-0.31
421.203	-0.3
421.563	-0.29
421.923	-0.27
422.283	-0.26
422.643	-0.25
423.004	-0.23
423.364	-0.22
423.724	-0.22
424.084	-0.2
424.444	-0.19
424.804	-0.19
425.163	-0.18
425.523	-0.17
425.883	-0.17
426.243	-0.15
426.603	-0.14
426.963	-0.13
427.322	-0.12
427.682	-0.11
428.042	-0.1
428.401	-0.09
428.761	-0.07
429.12	-0.06
429.48	-0.03
429.839	-0.01
430.199	0
430.558	0
430.918	0.02
431.277	0.03
431.636	0.05
431.996	0.06
432.355	0.06
432.714	0.07
433.073	0.07
433.432	0.07
433.792	0.08
434.151	0.07
434.51	0.08
434.869	0.08
435.228	0.08
435.587	0.08
435.946	0.09
436.305	0.1
436.663	0.1
437.022	0.11
437.381	0.11
437.74	0.12
438.099	0.13
438.457	0.13
438.816	0.14
439.175	0.15
439.533	0.16
439.892	0.16
440.25	0.17
440.609	0.18
440.967	0.18
441.326	0.2
441.684	0.2
442.042	0.21
442.401	0.22
442.759	0.24
443.117	0.24
443.475	0.25
443.834	0.27
444.192	0.27
444.55	0.28
444.908	0.3
445.266	0.31
445.624	0.33
445.982	0.35
446.34	0.36
446.698	0.37
447.056	0.38
447.414	0.4
447.772	0.4
448.129	0.41
448.487	0.42
448.845	0.43
449.203	0.44
449.56	0.45
449.918	0.46
450.276	0.47
450.633	0.48
450.991	0.49
451.348	0.51
451.706	0.53
452.063	0.55
452.42	0.57
452.778	0.58
453.135	0.61
453.492	0.62
453.85	0.64
454.207	0.65
454.564	0.66
454.921	0.66
455.278	0.67
455.635	0.67
455.992	0.68
456.349	0.68
456.706	0.69
457.063	0.7
457.42	0.71
457.777	0.72
458.134	0.72
458.491	0.73
458.848	0.73
459.204	0.74
459.561	0.74
459.918	0.74
460.274	0.74
460.631	0.74
460.988	0.73
461.344	0.73
461.701	0.73
462.057	0.74
462.414	0.74
462.77	0.74
463.126	0.74
463.483	0.75
463.839	0.75
464.195	0.76
464.551	0.77
464.908	0.78
465.264	0.79
465.62	0.8
465.976	0.79
466.332	0.8
466.688	0.8
467.044	0.81
467.4	0.81
467.756	0.8
468.112	0.8
468.468	0.8
468.823	0.79
469.179	0.8
469.535	0.8
469.891	0.81
470.246	0.81
470.602	0.82
470.958	0.82
471.313	0.82
471.669	0.83
472.024	0.84
472.38	0.85
472.735	0.85
473.091	0.85
473.446	0.85
473.801	0.85
474.156	0.85
474.512	0.85
474.867	0.86
475.222	0.85
475.577	0.85
475.932	0.86
476.287	0.85
476.643	0.85
476.998	0.84
477.352	0.84
477.707	0.84
478.062	0.85
478.417	0.85
478.772	0.84
479.127	0.85
479.482	0.85
479.836	0.84
480.191	0.84
480.546	0.85
480.9	0.86
481.255	0.86
481.609	0.85
481.964	0.85
482.318	0.84
482.673	0.83
483.027	0.82
483.382	0.82
483.736	0.8
484.09	0.78
484.445	0.76
484.799	0.76
485.153	0.77
485.507	0.77
485.861	0.77
486.215	0.76
486.569	0.77
486.923	0.77
487.277	0.77
487.631	0.77
487.985	0.77
488.339	0.77
488.693	0.77
489.047	0.77
489.4	0.77
489.754	0.78
490.108	0.79
490.462	0.79
490.815	0.79
491.169	0.8
491.522	0.81
491.876	0.82
492.229	0.83
492.583	0.83
492.936	0.84
493.289	0.85
493.643	0.86
493.996	0.87
494.349	0.88
494.703	0.89
495.056	0.91
495.409	0.92
495.762	0.94
496.115	0.97
496.468	1
496.821	1.03
497.174	1.06
497.527	1.08
497.88	1.1
498.233	1.1
498.586	1.12
498.938	1.12
499.291	1.13
499.644	1.15
499.997	1.16
500.349	1.17
500.702	1.19
501.054	1.21
501.407	1.23
501.759	1.25
502.112	1.27
502.464	1.29
502.817	1.31
503.169	1.34
503.521	1.36
503.874	1.38
504.226	1.41
504.578	1.43
504.93	1.45
505.282	1.47
505.634	1.49
505.986	1.51
506.338	1.53
506.69	1.54
507.042	1.56
507.394	1.57
507.746	1.57
508.098	1.58
508.45	1.59
508.802	1.61
509.153	1.62
509.505	1.64
509.857	1.66
510.208	1.69
510.56	1.7
510.911	1.72
511.263	1.73
511.614	1.75
511.966	1.76
512.317	1.77
512.668	1.79
513.02	1.79
513.371	1.8
513.722	1.81
514.073	1.82
514.425	1.83
514.776	1.84
515.127	1.86
515.478	1.87
515.829	1.89
516.18	1.91
516.531	1.92
516.882	1.95
517.233	1.97
517.583	1.99
517.934	2
518.285	2
518.636	2.01
518.986	2.02
519.337	2.02
519.688	2.02
520.038	2.03
520.389	2.04
520.739	2.04
521.09	2.06
521.44	2.07
521.79	2.08
522.141	2.1
522.491	2.13
522.841	2.15
523.192	2.18
523.542	2.21
523.892	2.24
524.242	2.27
524.592	2.31
524.942	2.33
525.292	2.35
525.642	2.38
525.992	2.4
526.342	2.42
526.692	2.43
527.041	2.45
527.391	2.46
527.741	2.48
528.091	2.5
528.44	2.51
528.79	2.53
529.14	2.56
529.489	2.61
529.839	2.67
530.188	2.72
530.537	2.75
530.887	2.78
531.236	2.81
531.586	2.83
531.935	2.86
532.284	2.89
532.633	2.92
532.982	2.96
533.332	2.99
533.681	3
534.03	3.02
534.379	3.06
534.728	3.1
535.077	3.13
535.425	3.16
535.774	3.19
536.123	3.23
536.472	3.26
536.821	3.29
537.169	3.33
537.518	3.37
537.867	3.42
538.215	3.47
538.564	3.53
538.912	3.58
539.261	3.63
539.609	3.68
539.957	3.71
540.306	3.75
540.654	3.79
541.002	3.84
541.351	3.9
541.699	3.95
542.047	3.99
542.395	4.03
542.743	4.07
543.091	4.09
543.439	4.11
543.787	4.14
544.135	4.16
544.483	4.18
544.831	4.21
545.179	4.24
545.526	4.28
545.874	4.33
546.222	4.38
546.569	4.43
546.917	4.49
547.265	4.55
547.612	4.62
547.96	4.68
548.307	4.73
548.655	4.79
549.002	4.84
549.349	4.88
549.697	4.93
550.044	4.98
550.391	5.03
550.738	5.08
551.085	5.14
551.432	5.19
551.78	5.26
552.127	5.33
552.474	5.4
552.82	5.47
553.167	5.52
553.514	5.57
553.861	5.61
554.208	5.66
554.555	5.7
554.901	5.74
555.248	5.79
555.595	5.83
555.941	5.86
556.288	5.9
556.634	5.95
556.981	6
557.327	6.05
557.673	6.11
558.02	6.18
558.366	6.24
558.712	6.29
559.059	6.34
559.405	6.39
559.751	6.45
560.097	6.5
560.443	6.55
560.789	6.6
561.135	6.65
561.481	6.71
561.827	6.75
562.173	6.8
562.519	6.84
562.865	6.9
563.21	6.95
563.556	7.01
563.902	7.05
564.247	7.1
564.593	7.14
564.938	7.19
565.284	7.23
565.629	7.28
565.975	7.32
566.32	7.37
566.666	7.39
567.011	7.43
567.356	7.45
567.701	7.48
568.047	7.51
568.392	7.55
568.737	7.59
569.082	7.62
569.427	7.65
569.772	7.69
570.117	7.74
570.462	7.79
570.807	7.84
571.151	7.88
571.496	7.93
571.841	7.97
572.186	7.99
572.53	8.01
572.875	8.02
573.219	8.03
573.564	8.05
573.909	8.06
574.253	8.08
574.597	8.09
574.942	8.11
575.286	8.13
575.63	8.14
575.975	8.15
576.319	8.18
576.663	8.2
577.007	8.24
577.351	8.26
577.695	8.29
578.039	8.31
578.383	8.33
578.727	8.35
579.071	8.38
579.415	8.41
579.759	8.43
580.103	8.46
580.446	8.48
580.79	8.5
581.134	8.52
581.477	8.53
581.821	8.54
582.164	8.55
582.508	8.56
582.851	8.57
583.195	8.57
583.538	8.58
583.881	8.59
584.224	8.59
584.568	8.6
584.911	8.6
585.254	8.6
585.597	8.61
585.94	8.62
586.283	8.63
586.626	8.62
586.969	8.62
587.312	8.61
587.655	8.61
587.998	8.61
588.341	8.6
588.683	8.6
589.026	8.59
589.369	8.57
589.711	8.55
590.054	8.53
590.396	8.52
590.739	8.51
591.081	8.5
591.424	8.48
591.766	8.46
592.108	8.45
592.451	8.44
592.793	8.42
593.135	8.43
593.477	8.43
593.819	8.43
594.161	8.43
594.503	8.43
594.845	8.43
595.187	8.42
595.529	8.41
595.871	8.41
596.213	8.41
596.555	8.4
596.896	8.37
597.238	8.35
597.58	8.32
597.921	8.29
598.263	8.26
598.604	8.23
598.946	8.23
599.287	8.23
599.629	8.23
599.97	8.23
600.311	8.24
600.653	8.25
600.994	8.27
601.335	8.28
601.676	8.31
602.017	8.34
602.358	8.37
602.699	8.38
603.04	8.38
603.381	8.36
603.722	8.32
604.063	8.29
604.404	8.26
604.745	8.24
605.085	8.2
605.426	8.16
605.767	8.1
606.107	8.07
606.448	8.04
606.788	8.03
607.129	8.02
607.469	8.03
607.809	8.03
608.15	8.03
608.49	8.01
608.83	8.01
609.171	8.02
609.511	8.03
609.851	8.03
610.191	8.01
610.531	7.97
610.871	7.92
611.211	7.88
611.551	7.85
611.891	7.83
612.23	7.81
612.57	7.81
612.91	7.8
613.25	7.78
613.589	7.77
613.929	7.76
614.269	7.78
614.608	7.79
614.948	7.79
615.287	7.78
615.626	7.76
615.966	7.74
616.305	7.71
616.644	7.68
616.984	7.66
617.323	7.64
617.662	7.61
618.001	7.57
618.34	7.53
618.679	7.49
619.018	7.45
619.357	7.43
619.696	7.41
620.035	7.38
620.373	7.34
620.712	7.32
621.051	7.29
621.389	7.26
621.728	7.24
622.067	7.22
622.405	7.21
622.744	7.18
623.082	7.17
623.42	7.14
623.759	7.12
624.097	7.12
624.435	7.1
624.774	7.09
625.112	7.09
625.45	7.08
625.788	7.06
626.126	7.05
626.464	7.05
626.802	7.04
627.14	7.02
627.478	7
627.816	6.96
628.154	6.94
628.491	6.92
628.829	6.9
629.167	6.88
629.504	6.87
629.842	6.85
630.179	6.83
630.517	6.81
630.854	6.81
631.192	6.81
631.529	6.81
631.866	6.81
632.204	6.83
632.541	6.84
632.878	6.84
633.215	6.84
633.552	6.85
633.889	6.84
634.226	6.84
634.563	6.83
634.9	6.82
635.237	6.8
635.574	6.79
635.911	6.77
636.247	6.75
636.584	6.73
636.921	6.72
637.257	6.68
637.594	6.67
637.93	6.65
638.267	6.65
638.603	6.62
638.939	6.6
639.276	6.59
639.612	6.56
639.948	6.54
640.285	6.51
640.621	6.48
640.957	6.47
641.293	6.45
641.629	6.43
641.965	6.38
642.301	6.34
642.637	6.3
642.973	6.27
643.308	6.23
643.644	6.19
643.98	6.15
644.315	6.1
644.651	6.04
644.987	5.97
645.322	5.92
645.658	5.88
645.993	5.83
646.329	5.78
646.664	5.73
646.999	5.68
647.334	5.63
647.67	5.57
648.005	5.53
648.34	5.48
648.675	5.42
649.01	5.38
649.345	5.33
649.68	5.28
650.015	5.25
650.35	5.19
650.685	5.14
651.019	5.09
651.354	5.05
651.689	4.99
652.023	4.94
652.358	4.9
652.693	4.84
653.027	4.78
653.361	4.73
653.696	4.66
654.03	4.61
654.365	4.56
654.699	4.51
655.033	4.46
655.367	4.43
655.701	4.4
656.035	4.36
656.369	4.32
656.703	4.27
657.037	4.25
657.371	4.22
657.705	4.17
658.039	4.1
658.373	4.04
658.707	3.99
659.04	3.92
659.374	3.85
659.707	3.78
660.041	3.67
660.374	3.58
660.708	3.47
661.041	3.37
661.375	3.28
661.708	3.21
662.041	3.14
662.374	3.05
662.708	2.97
663.041	2.88
663.374	2.8
663.707	2.73
664.04	2.65
664.373	2.56
664.706	2.48
665.039	2.4
665.371	2.31
665.704	2.21
666.037	2.14
666.37	2.03
666.702	1.94
667.035	1.85
667.367	1.75
667.7	1.64
668.032	1.55
668.365	1.46
668.697	1.39
669.029	1.27
669.362	1.19
669.694	1.08
670.026	0.99
670.358	0.89
670.69	0.79
671.022	0.71
671.354	0.65
671.686	0.57
672.018	0.48
672.35	0.4
672.682	0.35
673.013	0.28
673.345	0.22
673.677	0.19
674.008	0.15
674.34	0.12
674.671	0.07
675.003	0.03
675.334	-0.02
675.666	-0.06
675.997	-0.1
676.328	-0.13
676.659	-0.15
676.991	-0.19
677.322	-0.22
677.653	-0.26
677.984	-0.31
678.315	-0.35
678.646	-0.42
678.977	-0.45
679.308	-0.51
679.639	-0.58
679.969	-0.65
680.3	-0.75
680.631	-0.83
680.961	-0.95
681.292	-1.06
681.622	-1.17
681.953	-1.27
682.283	-1.34
682.614	-1.43
682.944	-1.5
683.274	-1.51
683.605	-1.55
683.935	-1.55
684.265	-1.54
684.595	-1.53
684.925	-1.5
685.255	-1.45
685.585	-1.4
685.915	-1.35
686.245	-1.28
686.575	-1.23
686.905	-1.23
687.234	-1.23
687.564	-1.25
687.894	-1.27
688.223	-1.28
688.553	-1.3
688.882	-1.33
689.212	-1.38
689.541	-1.43
689.871	-1.49
690.2	-1.55
690.529	-1.61
690.858	-1.64
691.187	-1.69
691.517	-1.73
691.846	-1.75
692.175	-1.78
692.504	-1.82
692.833	-1.84
693.162	-1.86
693.49	-1.89
693.819	-1.89
694.148	-1.93
694.477	-1.94
694.805	-1.96
695.134	-2
695.462	-2.05
695.791	-2.09
696.119	-2.15
696.448	-2.18
696.776	-2.26
697.104	-2.32
697.433	-2.42
697.761	-2.51
698.089	-2.61
698.417	-2.74
698.745	-2.85
699.073	-3.02
699.401	-3.21
699.729	-3.42
700.057	-3.66
700.385	-3.82
700.713	-4.01
701.04	-4.17
701.368	-4.31
701.696	-4.44
702.023	-4.56
702.351	-4.65
702.678	-4.74
703.006	-4.83
703.333	-4.88
703.661	-4.95
703.988	-5.07
704.315	-5.16
704.642	-5.27
704.969	-5.36
705.297	-5.47
705.624	-5.61
705.951	-5.74
706.278	-5.92
706.604	-6.11
706.931	-6.27
707.258	-6.45
707.585	-6.62
707.912	-6.8
708.238	-6.96
708.565	-7.16
708.892	-7.42
709.218	-7.64
709.545	-7.91
709.871	-8.14
710.197	-8.34
710.524	-8.59
710.85	-8.87
711.176	-9.11
711.502	-9.35
711.829	-9.57
712.155	-9.8
712.481	-10.04
712.807	-10.28
713.133	-10.49
713.458	-10.73
713.784	-10.98
714.11	-11.24
714.436	-11.47
714.762	-11.73
715.087	-11.97
715.413	-12.25
715.738	-12.53
716.064	-12.8
716.389	-13.14
716.715	-13.47
717.04	-13.74
717.365	-14.08
717.691	-14.41
718.016	-14.69
718.341	-14.98
718.666	-15.34
718.991	-15.65
719.316	-15.97
719.641	-16.31
719.966	-16.57
720.291	-16.84
720.616	-17.15
720.941	-17.43
721.265	-17.68
721.59	-18.02
721.915	-18.3
722.239	-18.51
722.564	-18.81
722.888	-19.07
723.213	-19.28
723.537	-19.6
723.861	-19.9
724.186	-20.15
724.51	-20.45
724.834	-20.82
725.158	-21.13
725.482	-21.53
725.806	-21.96
726.13	-22.26
726.454	-22.64
726.778	-22.97
727.102	-23.3
727.426	-23.68
727.749	-24.06
728.073	-24.38
728.397	-24.73
728.72	-25.13
729.044	-25.45
729.367	-25.82
729.691	-26.26
730.014	-26.62
730.337	-27.03
730.661	-27.37
730.984	-27.72
731.307	-28.13
731.63	-28.6
731.953	-28.93
732.276	-29.28
732.599	-29.59
732.922	-29.9
733.245	-30.24
733.568	-30.6
733.891	-30.97
734.213	-31.35
734.536	-31.7
734.859	-32.09
735.181	-32.4
735.504	-32.75
735.826	-33.15
736.149	-33.54
736.471	-33.92
736.793	-34.31
737.116	-34.68
737.438	-35.02
737.76	-35.37
738.082	-35.77
738.404	-36.06
738.726	-36.45
739.048	-36.84
739.37	-37.09
739.692	-37.51
740.014	-37.9
740.336	-38.17
740.658	-38.47
740.979	-38.71
741.301	-39.04
741.622	-39.35
741.944	-39.64
742.265	-39.9
742.587	-40.12
742.908	-40.48
743.23	-40.81
743.551	-41.1
743.872	-41.41
744.193	-41.86
744.514	-42.24
744.835	-42.6
745.156	-42.95
745.477	-43.32
745.798	-43.64
746.119	-44.01
746.44	-44.27
746.761	-44.53
747.081	-44.76
747.402	-45.13
747.723	-45.4
748.043	-45.82
748.364	-46.17
748.684	-46.43
749.005	-46.85
749.325	-47.2
749.645	-47.54
749.966	-47.87
750.286	-48.1
750.606	-48.52
750.926	-48.76
751.246	-48.99
751.566	-49.27
751.886	-49.59
752.206	-49.95
752.526	-50.22
752.846	-50.41
753.165	-50.7
753.485	-50.97
753.805	-51.31
754.124	-51.54
754.444	-51.85
754.763	-52.16
755.083	-52.36
755.402	-52.35
755.721	-52.48
756.041	-52.63
756.36	-52.97
756.679	-53.09
756.998	-53.37
757.317	-53.48
757.636	-53.76
757.955	-53.93
758.274	-54.11
758.593	-54.41
758.912	-54.81
759.231	-55.05
759.549	-55.25
759.868	-55.39
760.187	-55.83
760.505	-55.95
760.824	-56.32
761.142	-56.42
761.461	-56.71
761.779	-56.88
762.097	-57.04
762.416	-57.19
762.734	-57.47
763.052	-57.74
763.37	-58.02
763.688	-58.08
764.006	-58.37
764.324	-58.53
764.642	-58.86
764.96	-59.03
765.278	-59.14
765.595	-59.23
765.913	-59.37
766.231	-59.43
766.548	-59.4
766.866	-59.57
767.183	-59.77
767.501	-59.9
767.818	-60.06
768.135	-60.03
768.453	-60.19
768.77	-60.39
769.087	-60.63
769.404	-60.99
769.721	-61.35
770.038	-61.8
770.355	-62.02
770.672	-62.24
770.989	-62.35
771.306	-62.38
771.622	-62.7
771.939	-62.77
772.256	-62.95
772.572	-63.06
772.889	-62.94
773.205	-62.89
773.522	-62.95
773.838	-62.89
774.154	-63.08
774.471	-63.42
774.787	-63.77
775.103	-63.95
775.419	-64.22
775.735	-64.48
776.051	-64.76
776.367	-65
776.683	-65.25
776.999	-65.28
777.315	-65.37
777.63	-65.26
777.946	-65.33
778.262	-65.33
778.577	-65.28
778.893	-65.18
779.208	-65.19
779.524	-65.14
779.839	-64.93
780.155	-65.2
780.47	-65.27
780.785	-65.4
781.1	-65.53
781.415	-65.48
781.73	-65.62
782.045	-65.73
782.36	-66
782.675	-66.06
782.99	-66.07
783.305	-66.3
783.62	-66.18
783.934	-66.39
784.249	-66.57
784.564	-66.83
784.878	-66.84
785.193	-66.84
785.507	-66.85
785.821	-66.8
786.136	-66.74
786.45	-66.76
786.764	-66.83
787.078	-66.95
787.392	-67.05
787.706	-67.18
788.02	-67.11
788.334	-67.42
788.648	-67.49
788.962	-67.91
789.276	-68.09
789.59	-68.29
789.903	-68.59
790.217	-68.73
790.53	-68.55
790.844	-68.45
791.157	-68.3
791.471	-68.46
791.784	-68.51
792.097	-68.62
792.411	-68.63
792.724	-68.46
793.037	-68.47
793.35	-68.56
793.663	-68.59
793.976	-68.8
794.289	-68.96
794.602	-69.02
794.915	-68.89
795.228	-69.01
795.54	-69.07
795.853	-68.83
796.165	-69.16
796.478	-69.21
796.791	-68.98
797.103	-68.94
797.415	-68.72
797.728	-68.37
798.04	-68.45
798.352	-68.39
798.664	-68.03
798.976	-67.75
799.289	-67.82
799.601	-67.78
799.913	-67.52
800.224	-67.62
800.536	-67.7
800.848	-67.74
801.16	-68.04
801.471	-68.01
801.783	-68.28
802.095	-68.51
802.406	-68.98
802.718	-69.31
803.029	-69.4
803.34	-70.03
803.652	-70.03
803.963	-70.12
804.274	-70.36
804.585	-70.49
804.896	-70.91
805.207	-70.86
805.518	-70.88
805.829	-70.8
806.14	-70.64
806.451	-70.56
806.762	-70.11
807.072	-70.26
807.383	-70.02
807.694	-69.82
808.004	-69.78
808.315	-69.5
808.625	-69.24
808.936	-69.06
809.246	-68.97
809.556	-68.97
809.866	-68.86
810.177	-69.3
810.487	-69.21
810.797	-69.35
811.107	-69.56
811.417	-69.43
811.726	-69.37
812.036	-69.49
812.346	-69.58
812.656	-69.54
812.965	-69.56
813.275	-69.5
813.585	-69.26
813.894	-69.25
814.204	-69.49
814.513	-69.56
814.822	-69.89
815.132	-69.78
815.441	-69.96
815.75	-69.93
816.059	-70.35
816.368	-70.63
816.677	-71.09
816.986	-71.21
817.295	-71.33
817.604	-71.42
817.913	-71.46
818.221	-71.33
818.53	-71.92
818.839	-72.04
819.147	-72.1
819.456	-72.07
819.764	-71.83
820.073	-71.8
820.381	-71.4
820.689	-71.61
820.997	-71.67
821.306	-71.58
821.614	-71.59
821.922	-71.51
822.23	-71.34
822.538	-71.38
822.846	-71.38
823.153	-71.23
823.461	-70.5
823.769	-69.72
824.077	-68.78
824.384	-68.14
824.692	-67.91
824.999	-67.91
825.307	-67.84
825.614	-67.84
825.922	-67.85
826.229	-67.81
826.536	-67.76
826.843	-67.9
827.15	-68.16
827.457	-68.56
827.764	-69.09
828.071	-69.58
828.378	-69.82
828.685	-70.13
828.992	-70.36
829.299	-70.37
829.605	-70.51
829.912	-70.85
830.218	-70.92
830.525	-71.02
830.831	-71.13
831.138	-71.08
831.444	-71.17
831.75	-71.21
832.057	-71.37
832.363	-71.59
832.669	-72
832.975	-72.25
833.281	-72.35
833.587	-72.39
833.893	-72.4
834.199	-72.46
834.504	-72.44
834.81	-72.29
835.116	-72.52
835.421	-72.31
835.727	-72.03
836.032	-71.86
836.338	-71.8
836.643	-71.61
836.949	-71.46
837.254	-71.45
837.559	-71.42
837.864	-71.6
838.169	-71.52
838.474	-71.56
838.779	-71.65
839.084	-71.72
839.389	-72.09
839.694	-72.08
839.999	-72.21
840.303	-72.38
840.608	-72.62
840.913	-72.4
841.217	-72.4
841.522	-72.33
841.826	-72.35
842.13	-72.29
842.435	-72.37
842.739	-72.06
843.043	-72.25
843.347	-72.19
843.651	-72.3
843.955	-72.16
844.259	-72.29
844.563	-72.19
844.867	-72.31
845.171	-72.28
845.475	-72.23
845.778	-72.24
846.082	-72.83
846.385	-72.91
846.689	-72.89
846.992	-73.16
847.296	-73.24
847.599	-73.37
847.902	-73.53
848.206	-74.18
848.509	-73.82
848.812	-73.62
849.115	-73.78
849.418	-73.07
849.721	-72.97
850.024	-73.48
850.327	-74.04
850.629	-73.64
850.932	-73.55
851.235	-73.36
851.537	-72.38
851.84	-71.89
852.142	-71.95
852.445	-71.99
852.747	-72.57
853.049	-71.75
853.352	-71.4
853.654	-71.22
853.956	-71.94
854.258	-71.85
854.56	-71.92
854.862	-72.9
855.164	-73.57
855.466	-73.72
855.767	-73.79
856.069	-73.59
856.371	-74.51
856.672	-74.6
856.974	-74.46
857.275	-73.9
857.577	-73.94
857.878	-73.87
858.18	-73.55
858.481	-73.38
858.782	-73.77
859.083	-73.32
859.384	-73.39
859.685	-72.97
859.986	-72.83
860.287	-72.5
860.588	-73.23
860.889	-73.34
861.19	-73.18
861.49	-73.4
861.791	-74
862.092	-73.37
862.392	-73.88
862.693	-73.52
862.993	-73.59
863.293	-74.26
863.594	-74.38
863.894	-73.83
864.194	-73.81
864.494	-73.89
864.794	-73.37
865.094	-73.1
865.394	-73.18
865.694	-72.65
865.994	-72.6
866.293	-72.17
866.593	-72.18
866.893	-71.8
867.192	-71.88
867.492	-72.26
867.791	-72.32
868.091	-72.51
868.39	-72
868.689	-71.79
[truncated: 47 more rows]

## Sheet: Citmoc05
179.63	274.15
180.007	291.7
180.384	463.4
180.761	-934.94
181.138	-231.42
181.515	-64
181.892	-115.38
182.269	335.77
182.646	-2516.67
183.023	-224.14
183.4	-470
183.777	168.93
184.154	62.2
184.53	1405.56
184.907	-4.35
185.284	67.67
185.661	77.86
186.038	-25.64
186.414	-12.2
186.791	-15.66
187.168	-8.3
187.545	-10.71
187.921	-16.65
188.298	-10.38
188.675	-11.18
189.051	-9.22
189.428	-9.11
189.804	-6.89
190.181	-6
190.558	-10.6
190.934	-11.1
191.311	-9.38
191.687	-10
192.064	-7.1
192.44	-7.61
192.817	-5.71
193.193	-5.01
193.569	-5.57
193.946	-6.05
194.322	-6.94
194.698	-6.36
195.075	-4.28
195.451	-5.43
195.827	-3.06
196.203	-2.88
196.58	-2.97
196.956	-3.58
197.332	-4.17
197.708	-3.48
198.084	-5.25
198.461	-4.53
198.837	-2.03
199.213	-2.4
199.589	-3.24
199.965	-2.19
200.341	-3.89
200.717	-4.64
201.093	-4.81
201.469	-5.03
201.845	-4.84
202.221	-4.33
202.597	-5.14
202.972	-5.25
203.348	-3.48
203.724	-3.5
204.1	-7.49
204.476	-8.86
204.852	-7.99
205.227	-6.51
205.603	-5.36
205.979	-5.95
206.355	-4.69
206.73	-3.85
207.106	-4.27
207.481	-6.99
207.857	-6.85
208.233	-4.19
208.608	-2
208.984	-1.63
209.359	-4.52
209.735	-6.16
210.11	-5.74
210.486	-6.42
210.861	-7.05
211.237	-5.24
211.612	-5.17
211.987	-5.29
212.363	-6.96
212.738	-6.51
213.113	-6.49
213.489	-4.74
213.864	-5.31
214.239	-5.27
214.615	-5.78
214.99	-6.13
215.365	-7.58
215.74	-5.5
216.115	-6.17
216.49	-4.66
216.866	-4.22
217.241	-4.63
217.616	-5.61
217.991	-4.67
218.366	-3.36
218.741	-2.64
219.116	-1.72
219.491	-1.7
219.866	-1.51
220.241	-0.31
220.615	0
220.99	-1.92
221.365	-1.51
221.74	-0.96
222.115	-0.21
222.49	-1.27
222.864	-0.92
223.239	-2.62
223.614	-2.84
223.988	-2.42
224.363	-2.99
224.738	-4.15
225.112	-2.41
225.487	-1.21
225.862	-1.4
226.236	-2.41
226.611	-2.26
226.985	-3.09
227.36	-2.02
227.734	-2.32
228.109	-3.19
228.483	-2.41
228.858	-1.58
229.232	-2.31
229.606	-2.23
229.981	-2.14
230.355	-1.76
230.729	-1.61
231.104	-1.54
231.478	-1.29
231.852	-0.95
232.226	-1
232.601	-1.16
232.975	-1.52
233.349	-1.34
233.723	-1.69
234.097	-1.61
234.471	-1.64
234.845	-1.76
235.219	-1.7
235.593	-2.13
235.967	-2.49
236.341	-2.38
236.715	-2.21
237.089	-1.82
237.463	-1.68
237.837	-1.59
238.211	-1.73
238.585	-1.79
238.958	-1.88
239.332	-1.9
239.706	-1.8
240.08	-1.58
240.453	-1.62
240.827	-1.76
241.201	-1.84
241.575	-1.85
241.948	-1.86
242.322	-1.77
242.695	-1.8
243.069	-1.8
243.442	-1.77
243.816	-1.87
244.189	-1.92
244.563	-1.95
244.936	-1.97
245.31	-2
245.683	-2.05
246.057	-2.05
246.43	-2.11
246.803	-2.16
247.177	-2.17
247.55	-2.21
247.923	-2.21
248.296	-2.26
248.67	-2.28
249.043	-2.26
249.416	-2.28
249.789	-2.29
250.162	-2.33
250.535	-2.33
250.909	-2.33
251.282	-2.35
251.655	-2.39
252.028	-2.37
252.401	-2.36
252.774	-2.36
253.147	-2.43
253.52	-2.45
253.892	-2.42
254.265	-2.39
254.638	-2.4
255.011	-2.4
255.384	-2.4
255.757	-2.41
256.129	-2.46
256.502	-2.5
256.875	-2.51
257.247	-2.51
257.62	-2.47
257.993	-2.54
258.365	-2.52
258.738	-2.5
259.111	-2.52
259.483	-2.52
259.856	-2.53
260.228	-2.53
260.601	-2.51
260.973	-2.52
261.346	-2.5
261.718	-2.54
262.09	-2.53
262.463	-2.55
262.835	-2.58
263.207	-2.56
263.58	-2.6
263.952	-2.58
264.324	-2.6
264.696	-2.63
265.069	-2.65
265.441	-2.67
265.813	-2.67
266.185	-2.69
266.557	-2.64
266.929	-2.62
267.301	-2.6
267.673	-2.56
268.045	-2.57
268.417	-2.54
268.789	-2.52
269.161	-2.49
269.533	-2.49
269.905	-2.47
270.277	-2.46
270.649	-2.46
271.02	-2.46
271.392	-2.44
271.764	-2.41
272.136	-2.41
272.507	-2.39
272.879	-2.36
273.251	-2.31
273.622	-2.29
273.994	-2.28
274.366	-2.25
274.737	-2.26
275.109	-2.23
275.48	-2.23
275.852	-2.23
276.223	-2.17
276.595	-2.16
276.966	-2.15
277.338	-2.18
277.709	-2.18
278.08	-2.18
278.452	-2.18
278.823	-2.16
279.194	-2.16
279.565	-2.16
279.937	-2.16
280.308	-2.18
280.679	-2.19
281.05	-2.19
281.421	-2.18
281.792	-2.16
282.163	-2.16
282.535	-2.17
282.906	-2.15
283.277	-2.17
283.648	-2.16
284.018	-2.12
284.389	-2.11
284.76	-2.08
285.131	-2.06
285.502	-2.03
285.873	-2.03
286.244	-2.03
286.614	-2.01
286.985	-2.02
287.356	-1.98
287.727	-1.97
288.097	-1.98
288.468	-1.98
288.839	-1.99
289.209	-2.01
289.58	-2.02
289.95	-2.02
290.321	-2.02
290.691	-2.01
291.062	-2.02
291.432	-2.02
291.803	-2.03
292.173	-2.02
292.544	-2.02
292.914	-1.99
293.284	-2
293.655	-1.97
294.025	-1.97
294.395	-1.94
294.765	-1.93
295.135	-1.92
295.506	-1.93
295.876	-1.94
296.246	-1.98
296.616	-1.97
296.986	-1.99
297.356	-1.97
297.726	-1.99
298.096	-1.97
298.466	-1.99
298.836	-1.99
299.206	-1.98
299.576	-1.99
299.946	-1.96
300.316	-1.96
300.685	-1.97
301.055	-1.97
301.425	-2
301.795	-1.99
302.164	-2.01
302.534	-2.04
302.904	-2.08
303.273	-2.1
303.643	-2.1
304.013	-2.12
304.382	-2.13
304.752	-2.15
305.121	-2.15
305.491	-2.13
305.86	-2.15
306.23	-2.14
306.599	-2.15
306.968	-2.13
307.338	-2.12
307.707	-2.15
308.076	-2.13
308.446	-2.08
308.815	-2.07
309.184	-2.06
309.553	-2.1
309.922	-2.09
310.292	-2.11
310.661	-2.09
311.03	-2.11
311.399	-2.13
311.768	-2.11
312.137	-2.13
312.506	-2.18
312.875	-2.2
313.244	-2.26
313.613	-2.28
313.982	-2.35
314.35	-2.4
314.719	-2.45
315.088	-2.49
315.457	-2.57
315.826	-2.67
316.194	-2.79
316.563	-2.89
316.932	-3
317.3	-3.06
317.669	-3.14
318.037	-3.21
318.406	-3.29
318.775	-3.39
319.143	-3.51
319.512	-3.58
319.88	-3.65
320.248	-3.73
320.617	-3.8
320.985	-3.87
321.354	-3.92
321.722	-3.99
322.09	-4.05
322.458	-4.08
322.827	-4.1
323.195	-4.14
323.563	-4.17
323.931	-4.21
324.299	-4.23
324.667	-4.28
325.035	-4.34
325.404	-4.41
325.772	-4.44
326.14	-4.45
326.508	-4.49
326.875	-4.55
327.243	-4.59
327.611	-4.63
327.979	-4.65
328.347	-4.65
328.715	-4.66
329.083	-4.66
329.45	-4.69
329.818	-4.71
330.186	-4.77
330.553	-4.8
330.921	-4.82
331.289	-4.82
331.656	-4.84
332.024	-4.88
332.391	-4.93
332.759	-4.97
333.126	-5.02
333.494	-5.03
333.861	-5.07
334.229	-5.09
334.596	-5.1
334.963	-5.13
335.331	-5.16
335.698	-5.21
336.065	-5.25
336.432	-5.28
336.8	-5.31
337.167	-5.33
337.534	-5.34
337.901	-5.38
338.268	-5.4
338.635	-5.43
339.002	-5.45
339.369	-5.48
339.736	-5.5
340.103	-5.52
340.47	-5.55
340.837	-5.57
341.204	-5.61
341.571	-5.67
341.938	-5.68
342.304	-5.72
342.671	-5.77
343.038	-5.79
343.404	-5.83
343.771	-5.84
344.138	-5.86
344.504	-5.91
344.871	-5.96
345.238	-6.02
345.604	-6.06
345.971	-6.09
346.337	-6.15
346.704	-6.2
347.07	-6.24
347.436	-6.3
347.803	-6.34
348.169	-6.35
348.535	-6.37
348.902	-6.4
349.268	-6.42
349.634	-6.44
350	-6.46
350.366	-6.48
350.733	-6.5
351.099	-6.51
351.465	-6.51
351.831	-6.58
352.197	-6.64
352.563	-6.65
352.929	-6.67
353.295	-6.69
353.661	-6.74
354.027	-6.78
354.392	-6.77
354.758	-6.81
355.124	-6.84
355.49	-6.85
355.856	-6.84
356.221	-6.84
356.587	-6.85
356.953	-6.87
357.318	-6.88
357.684	-6.9
358.049	-6.91
358.415	-6.95
358.78	-6.95
359.146	-6.97
359.511	-6.99
359.877	-6.99
360.242	-6.99
360.608	-7.01
360.973	-7.01
361.338	-7.03
361.703	-7.03
362.069	-7.04
362.434	-7.05
362.799	-7.06
363.164	-7.06
363.529	-7.08
363.895	-7.09
364.26	-7.12
364.625	-7.12
364.99	-7.14
365.355	-7.14
365.72	-7.14
366.085	-7.16
366.449	-7.14
366.814	-7.13
367.179	-7.13
367.544	-7.12
367.909	-7.12
368.274	-7.07
368.638	-7.06
369.003	-7.04
369.368	-6.99
369.732	-6.96
370.097	-6.91
370.461	-6.9
370.826	-6.89
371.19	-6.86
371.555	-6.82
371.919	-6.77
372.284	-6.76
372.648	-6.74
373.013	-6.71
373.377	-6.7
373.741	-6.68
374.106	-6.66
374.47	-6.63
374.834	-6.6
375.198	-6.56
375.562	-6.54
375.927	-6.52
376.291	-6.48
376.655	-6.41
377.019	-6.35
377.383	-6.31
377.747	-6.25
378.111	-6.2
378.475	-6.17
378.839	-6.12
379.202	-6.05
379.566	-6
379.93	-5.96
380.294	-5.92
380.658	-5.87
381.021	-5.83
381.385	-5.78
381.749	-5.74
382.112	-5.68
382.476	-5.62
382.839	-5.59
383.203	-5.57
383.566	-5.53
383.93	-5.48
384.293	-5.44
384.657	-5.39
385.02	-5.33
385.384	-5.28
385.747	-5.23
386.11	-5.19
386.473	-5.12
386.837	-5.03
387.2	-4.97
387.563	-4.91
387.926	-4.85
388.289	-4.77
388.652	-4.74
389.015	-4.7
389.378	-4.64
389.741	-4.58
390.104	-4.52
390.467	-4.47
390.83	-4.43
391.193	-4.37
391.556	-4.32
391.919	-4.27
392.281	-4.21
392.644	-4.13
393.007	-4.06
393.37	-3.99
393.732	-3.92
394.095	-3.86
394.458	-3.81
394.82	-3.73
395.183	-3.67
395.545	-3.6
395.908	-3.53
396.27	-3.46
396.632	-3.42
396.995	-3.36
397.357	-3.31
397.719	-3.26
398.082	-3.2
398.444	-3.14
398.806	-3.08
399.168	-3.01
399.531	-2.94
399.893	-2.89
400.255	-2.82
400.617	-2.75
400.979	-2.71
401.341	-2.65
401.703	-2.59
402.065	-2.54
402.427	-2.49
402.789	-2.43
403.15	-2.38
403.512	-2.34
403.874	-2.29
404.236	-2.25
404.598	-2.21
404.959	-2.16
405.321	-2.11
405.683	-2.06
406.044	-2.01
406.406	-1.98
406.767	-1.96
407.129	-1.94
407.49	-1.9
407.852	-1.87
408.213	-1.83
408.574	-1.79
408.936	-1.75
409.297	-1.72
409.658	-1.69
410.02	-1.67
410.381	-1.65
410.742	-1.61
411.103	-1.56
411.464	-1.54
411.825	-1.5
412.186	-1.48
412.548	-1.46
412.909	-1.43
413.269	-1.42
413.63	-1.4
413.991	-1.38
414.352	-1.36
414.713	-1.33
415.074	-1.33
415.435	-1.3
415.795	-1.29
416.156	-1.26
416.517	-1.25
416.877	-1.22
417.238	-1.2
417.599	-1.19
417.959	-1.17
418.32	-1.15
418.68	-1.12
419.041	-1.1
419.401	-1.09
419.761	-1.07
420.122	-1.06
420.482	-1.05
420.842	-1.04
421.203	-1.03
421.563	-1.01
421.923	-1
422.283	-0.98
422.643	-0.97
423.004	-0.96
423.364	-0.95
423.724	-0.94
424.084	-0.93
424.444	-0.92
424.804	-0.91
425.163	-0.9
425.523	-0.89
425.883	-0.88
426.243	-0.87
426.603	-0.86
426.963	-0.85
427.322	-0.84
427.682	-0.84
428.042	-0.83
428.401	-0.82
428.761	-0.8
429.12	-0.79
429.48	-0.79
429.839	-0.77
430.199	-0.77
430.558	-0.77
430.918	-0.76
431.277	-0.75
431.636	-0.73
431.996	-0.72
432.355	-0.72
432.714	-0.71
433.073	-0.7
433.432	-0.69
433.792	-0.69
434.151	-0.68
434.51	-0.67
434.869	-0.67
435.228	-0.67
435.587	-0.67
435.946	-0.66
436.305	-0.65
436.663	-0.65
437.022	-0.65
437.381	-0.64
437.74	-0.62
438.099	-0.61
438.457	-0.61
438.816	-0.61
439.175	-0.6
439.533	-0.58
439.892	-0.57
440.25	-0.56
440.609	-0.55
440.967	-0.55
441.326	-0.54
441.684	-0.54
442.042	-0.53
442.401	-0.52
442.759	-0.5
443.117	-0.5
443.475	-0.49
443.834	-0.47
444.192	-0.5
444.55	-0.49
444.908	-0.47
445.266	-0.45
445.624	-0.43
445.982	-0.41
446.34	-0.4
446.698	-0.38
447.056	-0.36
447.414	-0.35
447.772	-0.35
448.129	-0.3
448.487	-0.28
448.845	-0.28
449.203	-0.27
449.56	-0.26
449.918	-0.25
450.276	-0.24
450.633	-0.22
450.991	-0.2
451.348	-0.18
451.706	-0.16
452.063	-0.14
452.42	-0.14
452.778	-0.11
453.135	-0.09
453.492	-0.07
453.85	-0.06
454.207	-0.05
454.564	-0.04
454.921	-0.04
455.278	-0.04
455.635	-0.03
455.992	-0.02
456.349	-0.01
456.706	0
457.063	0.01
457.42	0
457.777	0.01
458.134	0.01
458.491	0.02
458.848	0.04
459.204	0.05
459.561	0.05
459.918	0.06
460.274	0.06
460.631	0.06
460.988	0.06
461.344	0.06
461.701	0.06
462.057	0.06
462.414	0.07
462.77	0.07
463.126	0.07
463.483	0.07
463.839	0.07
464.195	0.07
464.551	0.08
464.908	0.09
465.264	0.1
465.62	0.1
465.976	0.1
466.332	0.1
466.688	0.1
467.044	0.1
467.4	0.1
467.756	0.1
468.112	0.11
468.468	0.11
468.823	0.12
469.179	0.12
469.535	0.13
469.891	0.14
470.246	0.15
470.602	0.16
470.958	0.17
471.313	0.17
471.669	0.19
472.024	0.19
472.38	0.2
472.735	0.2
473.091	0.2
473.446	0.2
473.801	0.2
474.156	0.2
474.512	0.2
474.867	0.2
475.222	0.2
475.577	0.2
475.932	0.2
476.287	0.2
476.643	0.2
476.998	0.21
477.352	0.21
477.707	0.21
478.062	0.21
478.417	0.21
478.772	0.21
479.127	0.21
479.482	0.2
479.836	0.19
480.191	0.19
480.546	0.19
480.9	0.19
481.255	0.18
481.609	0.18
481.964	0.18
482.318	0.18
482.673	0.17
483.027	0.17
483.382	0.16
483.736	0.15
484.09	0.14
484.445	0.12
484.799	0.11
485.153	0.11
485.507	0.11
485.861	0.11
486.215	0.11
486.569	0.12
486.923	0.12
487.277	0.12
487.631	0.13
487.985	0.13
488.339	0.14
488.693	0.15
489.047	0.16
489.4	0.16
489.754	0.17
490.108	0.18
490.462	0.18
490.815	0.19
491.169	0.2
491.522	0.21
491.876	0.22
492.229	0.23
492.583	0.24
492.936	0.24
493.289	0.26
493.643	0.27
493.996	0.28
494.349	0.29
494.703	0.3
495.056	0.31
495.409	0.33
495.762	0.35
496.115	0.38
496.468	0.41
496.821	0.45
497.174	0.48
497.527	0.5
497.88	0.52
498.233	0.53
498.586	0.55
498.938	0.56
499.291	0.57
499.644	0.59
499.997	0.61
500.349	0.63
500.702	0.64
501.054	0.67
501.407	0.7
501.759	0.72
502.112	0.74
502.464	0.76
502.817	0.78
503.169	0.8
503.521	0.82
503.874	0.84
504.226	0.87
504.578	0.9
504.93	0.92
505.282	0.95
505.634	0.97
505.986	1
506.338	1.02
506.69	1.05
507.042	1.06
507.394	1.09
507.746	1.1
508.098	1.12
508.45	1.14
508.802	1.15
509.153	1.17
509.505	1.19
509.857	1.21
510.208	1.23
510.56	1.25
510.911	1.27
511.263	1.29
511.614	1.3
511.966	1.31
512.317	1.33
512.668	1.35
513.02	1.36
513.371	1.37
513.722	1.38
514.073	1.4
514.425	1.41
514.776	1.43
515.127	1.45
515.478	1.47
515.829	1.49
516.18	1.52
516.531	1.54
516.882	1.56
517.233	1.59
517.583	1.62
517.934	1.63
518.285	1.64
518.636	1.65
518.986	1.66
519.337	1.66
519.688	1.67
520.038	1.68
520.389	1.69
520.739	1.71
521.09	1.72
521.44	1.75
521.79	1.77
522.141	1.79
522.491	1.81
522.841	1.85
523.192	1.88
523.542	1.91
523.892	1.95
524.242	1.99
524.592	2.02
524.942	2.05
525.292	2.07
525.642	2.1
525.992	2.12
526.342	2.14
526.692	2.15
527.041	2.17
527.391	2.19
527.741	2.21
528.091	2.23
528.44	2.25
528.79	2.27
529.14	2.29
529.489	2.35
529.839	2.41
530.188	2.46
530.537	2.5
530.887	2.53
531.236	2.56
531.586	2.59
531.935	2.62
532.284	2.65
532.633	2.69
532.982	2.74
533.332	2.78
533.681	2.79
534.03	2.82
534.379	2.86
534.728	2.9
535.077	2.94
535.425	2.98
535.774	3.01
536.123	3.04
536.472	3.08
536.821	3.11
537.169	3.15
537.518	3.19
537.867	3.25
538.215	3.31
538.564	3.37
538.912	3.43
539.261	3.47
539.609	3.52
539.957	3.55
540.306	3.59
540.654	3.64
541.002	3.69
541.351	3.75
541.699	3.79
542.047	3.84
542.395	3.87
542.743	3.9
543.091	3.93
543.439	3.96
543.787	3.99
544.135	4.02
544.483	4.04
544.831	4.07
545.179	4.11
545.526	4.15
545.874	4.21
546.222	4.27
546.569	4.33
546.917	4.39
547.265	4.45
547.612	4.51
547.96	4.56
548.307	4.61
548.655	4.66
549.002	4.72
549.349	4.77
549.697	4.81
550.044	4.86
550.391	4.91
550.738	4.96
551.085	5.02
551.432	5.08
551.78	5.16
552.127	5.24
552.474	5.31
552.82	5.36
553.167	5.41
553.514	5.46
553.861	5.5
554.208	5.55
554.555	5.59
554.901	5.63
555.248	5.68
555.595	5.72
555.941	5.76
556.288	5.81
556.634	5.86
556.981	5.92
557.327	5.97
557.673	6.03
558.02	6.1
558.366	6.16
558.712	6.22
559.059	6.27
559.405	6.32
559.751	6.38
560.097	6.42
560.443	6.48
560.789	6.52
561.135	6.58
561.481	6.63
561.827	6.68
562.173	6.73
562.519	6.77
562.865	6.82
563.21	6.87
563.556	6.92
563.902	6.97
564.247	7.01
564.593	7.06
564.938	7.11
565.284	7.14
565.629	7.18
565.975	7.22
566.32	7.26
566.666	7.29
567.011	7.31
567.356	7.33
567.701	7.37
568.047	7.4
568.392	7.45
568.737	7.48
569.082	7.53
569.427	7.57
569.772	7.62
570.117	7.67
570.462	7.73
570.807	7.78
571.151	7.84
571.496	7.88
571.841	7.92
572.186	7.94
572.53	7.95
572.875	7.95
573.219	7.96
573.564	7.97
573.909	7.98
574.253	8
574.597	8.01
574.942	8.03
575.286	8.05
575.63	8.07
575.975	8.09
576.319	8.12
576.663	8.15
577.007	8.18
577.351	8.21
577.695	8.23
578.039	8.26
578.383	8.28
578.727	8.31
579.071	8.33
579.415	8.36
579.759	8.38
580.103	8.4
580.446	8.43
580.79	8.44
581.134	8.47
581.477	8.49
581.821	8.49
582.164	8.5
582.508	8.51
582.851	8.52
583.195	8.53
583.538	8.54
583.881	8.55
584.224	8.56
584.568	8.57
584.911	8.57
585.254	8.57
585.597	8.58
585.94	8.59
586.283	8.59
586.626	8.59
586.969	8.58
587.312	8.58
587.655	8.58
587.998	8.58
588.341	8.57
588.683	8.57
589.026	8.56
589.369	8.55
589.711	8.53
590.054	8.51
590.396	8.5
590.739	8.49
591.081	8.47
591.424	8.46
591.766	8.46
592.108	8.45
592.451	8.45
592.793	8.43
593.135	8.43
593.477	8.42
593.819	8.43
594.161	8.43
594.503	8.44
594.845	8.44
595.187	8.42
595.529	8.41
595.871	8.4
596.213	8.39
596.555	8.39
596.896	8.37
597.238	8.35
597.58	8.32
597.921	8.28
598.263	8.24
598.604	8.22
598.946	8.22
599.287	8.22
599.629	8.22
599.97	8.23
600.311	8.22
600.653	8.23
600.994	8.24
601.335	8.26
601.676	8.29
602.017	8.33
602.358	8.34
602.699	8.35
603.04	8.34
603.381	8.33
603.722	8.3
604.063	8.28
604.404	8.25
604.745	8.22
605.085	8.18
605.426	8.13
605.767	8.07
606.107	8.04
606.448	8.01
606.788	8
607.129	7.99
607.469	7.99
607.809	7.99
608.15	7.98
608.49	7.97
608.83	7.98
609.171	8
609.511	8.02
609.851	8.02
610.191	8.01
610.531	7.97
610.871	7.92
611.211	7.87
611.551	7.84
611.891	7.82
612.23	7.8
612.57	7.78
612.91	7.76
613.25	7.75
613.589	7.75
613.929	7.74
614.269	7.74
614.608	7.75
614.948	7.75
615.287	7.74
615.626	7.71
615.966	7.7
616.305	7.67
616.644	7.64
616.984	7.62
617.323	7.6
617.662	7.57
618.001	7.54
618.34	7.51
618.679	7.49
619.018	7.44
619.357	7.42
619.696	7.39
620.035	7.36
620.373	7.32
620.712	7.28
621.051	7.25
621.389	7.22
621.728	7.2
622.067	7.18
622.405	7.17
622.744	7.16
623.082	7.15
623.42	7.13
623.759	7.11
624.097	7.1
624.435	7.09
624.774	7.07
625.112	7.08
625.45	7.08
625.788	7.06
626.126	7.03
626.464	7.01
626.802	6.99
627.14	6.97
627.478	6.95
627.816	6.92
628.154	6.9
628.491	6.88
628.829	6.85
629.167	6.82
629.504	6.81
629.842	6.8
630.179	6.8
630.517	6.79
630.854	6.79
631.192	6.79
631.529	6.79
631.866	6.78
632.204	6.78
632.541	6.79
632.878	6.8
633.215	6.81
633.552	6.8
633.889	6.79
634.226	6.77
634.563	6.76
634.9	6.74
635.237	6.72
635.574	6.72
635.911	6.7
636.247	6.68
636.584	6.66
636.921	6.63
637.257	6.62
637.594	6.6
637.93	6.59
638.267	6.57
638.603	6.56
638.939	6.53
639.276	6.49
639.612	6.48
639.948	6.45
640.285	6.41
640.621	6.38
640.957	6.35
641.293	6.32
641.629	6.29
641.965	6.26
642.301	6.22
642.637	6.19
642.973	6.16
643.308	6.12
643.644	6.08
643.98	6.05
644.315	5.99
644.651	5.94
644.987	5.9
645.322	5.85
645.658	5.8
645.993	5.73
646.329	5.68
646.664	5.63
646.999	5.57
647.334	5.52
647.67	5.45
648.005	5.42
648.34	5.36
648.675	5.29
649.01	5.24
649.345	5.19
649.68	5.14
650.015	5.08
650.35	5.01
650.685	4.96
651.019	4.9
651.354	4.85
651.689	4.8
652.023	4.74
652.358	4.67
652.693	4.61
653.027	4.56
653.361	4.52
653.696	4.47
654.03	4.42
654.365	4.38
654.699	4.32
655.033	4.29
655.367	4.25
655.701	4.23
656.035	4.2
656.369	4.16
656.703	4.11
657.037	4.08
657.371	4.04
657.705	4.01
658.039	3.95
658.373	3.9
658.707	3.83
659.04	3.75
659.374	3.68
659.707	3.6
660.041	3.49
660.374	3.39
660.708	3.28
661.041	3.18
661.375	3.07
661.708	2.99
662.041	2.91
662.374	2.83
662.708	2.75
663.041	2.66
663.374	2.58
663.707	2.51
664.04	2.44
664.373	2.35
664.706	2.28
665.039	2.21
665.371	2.12
665.704	2.03
666.037	1.94
666.37	1.85
666.702	1.77
667.035	1.67
667.367	1.58
667.7	1.47
668.032	1.38
668.365	1.29
668.697	1.2
669.029	1.11
669.362	1.02
669.694	0.91
670.026	0.82
670.358	0.7
670.69	0.61
671.022	0.51
671.354	0.44
671.686	0.36
672.018	0.26
672.35	0.18
672.682	0.11
673.013	0.05
673.345	0.01
673.677	-0.05
674.008	-0.08
674.34	-0.11
674.671	-0.14
675.003	-0.17
675.334	-0.21
675.666	-0.24
675.997	-0.26
676.328	-0.27
676.659	-0.3
676.991	-0.33
677.322	-0.36
677.653	-0.4
677.984	-0.45
678.315	-0.51
678.646	-0.57
678.977	-0.61
679.308	-0.68
679.639	-0.76
679.969	-0.85
680.3	-0.94
680.631	-1.03
680.961	-1.12
681.292	-1.23
681.622	-1.33
681.953	-1.41
682.283	-1.46
682.614	-1.54
682.944	-1.59
683.274	-1.6
683.605	-1.61
683.935	-1.62
684.265	-1.62
684.595	-1.59
684.925	-1.54
685.255	-1.46
685.585	-1.4
685.915	-1.34
686.245	-1.26
686.575	-1.22
686.905	-1.2
687.234	-1.18
687.564	-1.16
687.894	-1.14
688.223	-1.12
688.553	-1.13
688.882	-1.15
689.212	-1.18
689.541	-1.23
689.871	-1.27
690.2	-1.28
690.529	-1.32
690.858	-1.36
691.187	-1.37
691.517	-1.41
691.846	-1.43
692.175	-1.44
692.504	-1.46
692.833	-1.48
693.162	-1.47
693.49	-1.47
693.819	-1.48
694.148	-1.48
694.477	-1.47
694.805	-1.47
695.134	-1.48
695.462	-1.53
695.791	-1.53
696.119	-1.61
696.448	-1.62
696.776	-1.68
697.104	-1.75
697.433	-1.84
697.761	-1.93
698.089	-2.03
698.417	-2.16
698.745	-2.28
699.073	-2.43
699.401	-2.67
699.729	-2.89
700.057	-3.14
700.385	-3.32
700.713	-3.53
701.04	-3.69
701.368	-3.84
701.696	-3.97
702.023	-4.07
702.351	-4.18
702.678	-4.26
703.006	-4.31
703.333	-4.33
703.661	-4.37
703.988	-4.46
704.315	-4.48
704.642	-4.57
704.969	-4.63
705.297	-4.71
705.624	-4.85
705.951	-4.95
706.278	-5.13
706.604	-5.3
706.931	-5.46
707.258	-5.65
707.585	-5.8
707.912	-5.97
708.238	-6.15
708.565	-6.33
708.892	-6.58
709.218	-6.78
709.545	-7.06
709.871	-7.29
710.197	-7.52
710.524	-7.76
710.85	-8
711.176	-8.27
711.502	-8.51
711.829	-8.72
712.155	-8.98
712.481	-9.19
712.807	-9.43
713.133	-9.65
713.458	-9.88
713.784	-10.09
714.11	-10.37
714.436	-10.6
714.762	-10.83
715.087	-11.07
715.413	-11.34
715.738	-11.66
716.064	-11.93
716.389	-12.22
716.715	-12.51
717.04	-12.79
717.365	-13.11
717.691	-13.44
718.016	-13.72
718.341	-13.97
718.666	-14.29
718.991	-14.56
719.316	-14.79
719.641	-15.14
719.966	-15.4
720.291	-15.7
720.616	-15.96
720.941	-16.22
721.265	-16.45
721.59	-16.74
721.915	-17.05
722.239	-17.29
722.564	-17.63
722.888	-17.89
723.213	-18.05
723.537	-18.32
723.861	-18.57
724.186	-18.85
724.51	-19.12
724.834	-19.45
725.158	-19.83
725.482	-20.19
725.806	-20.59
726.13	-20.88
726.454	-21.32
726.778	-21.67
727.102	-22.09
727.426	-22.46
727.749	-22.84
728.073	-23.21
728.397	-23.59
728.72	-23.89
729.044	-24.26
729.367	-24.65
729.691	-25.05
730.014	-25.37
730.337	-25.76
730.661	-26.09
730.984	-26.41
731.307	-26.79
731.63	-27.23
731.953	-27.55
732.276	-27.93
732.599	-28.21
732.922	-28.5
733.245	-28.84
733.568	-29.16
733.891	-29.56
734.213	-29.91
734.536	-30.28
734.859	-30.71
735.181	-31.05
735.504	-31.43
735.826	-31.86
736.149	-32.25
736.471	-32.59
736.793	-32.92
737.116	-33.36
737.438	-33.64
737.76	-33.97
738.082	-34.32
738.404	-34.57
738.726	-34.9
739.048	-35.17
739.37	-35.35
739.692	-35.78
740.014	-36.14
740.336	-36.49
740.658	-36.7
740.979	-37.01
741.301	-37.34
741.622	-37.64
741.944	-37.96
742.265	-38.19
742.587	-38.49
742.908	-38.86
743.23	-39.15
743.551	-39.41
743.872	-39.76
744.193	-40.24
744.514	-40.63
744.835	-40.99
745.156	-41.33
745.477	-41.7
745.798	-42.06
746.119	-42.4
746.44	-42.65
746.761	-42.89
747.081	-43.25
747.402	-43.56
747.723	-43.79
748.043	-44.09
748.364	-44.36
748.684	-44.62
749.005	-45.04
749.325	-45.42
749.645	-45.82
749.966	-46.17
750.286	-46.48
750.606	-46.83
750.926	-47.01
751.246	-47.22
751.566	-47.51
751.886	-47.87
752.206	-48.25
752.526	-48.44
752.846	-48.56
753.165	-48.77
753.485	-49.07
753.805	-49.32
754.124	-49.51
754.444	-49.82
754.763	-50.26
755.083	-50.46
755.402	-50.55
755.721	-50.74
756.041	-50.89
756.36	-51.17
756.679	-51.36
756.998	-51.65
757.317	-51.84
757.636	-52.06
757.955	-52.24
758.274	-52.34
758.593	-52.68
758.912	-52.95
759.231	-53.14
759.549	-53.44
759.868	-53.63
760.187	-54.01
760.505	-54.18
760.824	-54.44
761.142	-54.63
761.461	-54.96
761.779	-55.18
762.097	-55.33
762.416	-55.52
762.734	-55.75
763.052	-56.06
763.37	-56.35
763.688	-56.43
764.006	-56.64
764.324	-56.88
764.642	-57.16
764.96	-57.39
765.278	-57.51
765.595	-57.61
765.913	-57.76
766.231	-57.84
766.548	-57.77
766.866	-57.92
767.183	-58.06
767.501	-58.18
767.818	-58.32
768.135	-58.35
768.453	-58.43
768.77	-58.58
769.087	-58.77
769.404	-59.13
769.721	-59.53
770.038	-60
770.355	-60.31
770.672	-60.55
770.989	-60.73
771.306	-60.77
771.622	-61.05
771.939	-61.26
772.256	-61.44
772.572	-61.56
772.889	-61.52
773.205	-61.39
773.522	-61.39
773.838	-61.34
774.154	-61.53
774.471	-61.79
774.787	-62.16
775.103	-62.41
775.419	-62.52
775.735	-62.76
776.051	-63.07
776.367	-63.26
776.683	-63.57
776.999	-63.61
777.315	-63.74
777.63	-63.65
777.946	-63.77
778.262	-63.74
778.577	-63.71
778.893	-63.58
779.208	-63.61
779.524	-63.61
779.839	-63.38
780.155	-63.64
780.47	-63.75
780.785	-63.81
781.1	-63.96
781.415	-63.84
781.73	-63.98
782.045	-64.04
782.36	-64.46
782.675	-64.54
782.99	-64.5
783.305	-64.68
783.62	-64.74
783.934	-64.78
784.249	-65
784.564	-65.32
784.878	-65.4
785.193	-65.48
785.507	-65.49
785.821	-65.38
786.136	-65.32
786.45	-65.5
786.764	-65.56
787.078	-65.47
787.392	-65.65
787.706	-65.78
788.02	-65.62
788.334	-65.91
788.648	-65.86
788.962	-66.2
789.276	-66.35
789.59	-66.44
789.903	-66.62
790.217	-66.69
790.53	-66.62
790.844	-66.55
791.157	-66.33
791.471	-66.39
791.784	-66.41
792.097	-66.52
792.411	-66.58
792.724	-66.47
793.037	-66.57
793.35	-66.73
793.663	-66.87
793.976	-67.08
794.289	-67.28
794.602	-67.32
794.915	-67.45
795.228	-67.66
795.54	-67.79
795.853	-67.65
796.165	-67.84
796.478	-67.83
796.791	-67.55
797.103	-67.46
797.415	-67.32
797.728	-67.02
798.04	-67.23
798.352	-67.11
798.664	-66.67
798.976	-66.37
799.289	-66.32
799.601	-66.34
799.913	-66.19
800.224	-66.19
800.536	-66.29
800.848	-66.23
801.16	-66.46
801.471	-66.41
801.783	-66.71
802.095	-67.05
802.406	-67.47
802.718	-67.92
803.029	-68.11
803.34	-68.7
803.652	-68.87
803.963	-69.06
804.274	-69.26
804.585	-69.37
804.896	-69.64
805.207	-69.64
805.518	-69.71
805.829	-69.63
806.14	-69.38
806.451	-69.34
806.762	-68.94
807.072	-68.91
807.383	-68.53
807.694	-68.42
808.004	-68.42
808.315	-68.26
808.625	-67.85
808.936	-67.48
809.246	-67.32
809.556	-67.17
809.866	-67.07
810.177	-67.25
810.487	-67.35
810.797	-67.68
811.107	-67.81
811.417	-67.63
811.726	-67.49
812.036	-67.7
812.346	-67.91
812.656	-67.91
812.965	-68.2
813.275	-68.15
813.585	-68.1
813.894	-68.04
814.204	-68.24
814.513	-68.31
814.822	-68.59
815.132	-68.54
815.441	-68.64
815.75	-68.59
816.059	-69.02
816.368	-69.11
816.677	-69.53
816.986	-69.62
817.295	-69.75
817.604	-69.68
817.913	-69.79
818.221	-69.64
818.53	-70.13
818.839	-70.17
819.147	-70.35
819.456	-70.22
819.764	-70.1
820.073	-69.98
820.381	-69.7
820.689	-69.83
820.997	-69.92
821.306	-69.86
821.614	-70.07
821.922	-70.05
822.23	-69.9
822.538	-69.84
822.846	-69.91
823.153	-69.8
823.461	-69.01
823.769	-68.12
824.077	-67.23
824.384	-66.61
824.692	-66.31
824.999	-66.23
825.307	-66.16
825.614	-66.14
825.922	-66.14
826.229	-66.1
826.536	-66
826.843	-66.12
827.15	-66.33
827.457	-66.65
827.764	-67.12
828.071	-67.57
828.378	-67.81
828.685	-68
828.992	-68.27
829.299	-68.33
829.605	-68.51
829.912	-68.78
830.218	-68.84
830.525	-69.02
830.831	-69.14
831.138	-69.09
831.444	-69.23
831.75	-69.25
832.057	-69.49
832.363	-69.65
832.669	-70
832.975	-70.22
833.281	-70.5
833.587	-70.75
833.893	-70.63
834.199	-70.79
834.504	-70.85
834.81	-70.63
835.116	-70.97
835.421	-70.6
835.727	-70.3
836.032	-70.14
836.338	-70.04
836.643	-69.89
836.949	-69.64
837.254	-69.67
837.559	-69.61
837.864	-69.7
838.169	-69.62
838.474	-69.59
838.779	-69.78
839.084	-69.9
839.389	-70.19
839.694	-70.13
839.999	-70.12
840.303	-70.28
840.608	-70.56
840.913	-70.45
841.217	-70.46
841.522	-70.62
841.826	-70.6
842.13	-70.45
842.435	-70.62
842.739	-70.43
843.043	-70.62
843.347	-70.68
843.651	-70.8
843.955	-70.7
844.259	-71.03
844.563	-71.04
844.867	-70.98
845.171	-71.12
845.475	-71.31
845.778	-71.26
846.082	-71.84
846.385	-71.87
846.689	-71.83
846.992	-72.51
847.296	-72.51
847.599	-72.1
847.902	-72.26
848.206	-72.92
848.509	-72.46
848.812	-72.2
849.115	-72.31
849.418	-71.55
849.721	-71.51
850.024	-72.1
850.327	-72.34
850.629	-72.04
850.932	-71.83
851.235	-71.76
851.537	-71.01
851.84	-70.86
852.142	-71.29
852.445	-71.35
852.747	-71.71
853.049	-71.24
853.352	-71.12
853.654	-70.6
853.956	-71.31
854.258	-71.61
854.56	-71.17
854.862	-72.07
855.164	-72.64
855.466	-72.74
855.767	-72.8
856.069	-72.73
856.371	-73.11
856.672	-73
856.974	-73.47
857.275	-73.23
857.577	-73.42
857.878	-73.43
858.18	-72.76
858.481	-72.31
858.782	-72.47
859.083	-72.23
859.384	-72.46
859.685	-72.89
859.986	-72.9
860.287	-72.07
860.588	-72.41
860.889	-72.49
861.19	-72.81
861.49	-73.3
861.791	-73.57
862.092	-73.07
862.392	-73.57
862.693	-73.56
862.993	-72.91
863.293	-73.18
863.594	-73.28
863.894	-73.02
864.194	-73.41
864.494	-73.48
864.794	-72.86
865.094	-72.86
865.394	-72.91
865.694	-72.69
865.994	-72.23
866.293	-72.29
866.593	-72.42
866.893	-71.97
867.192	-72.09
867.492	-71.84
867.791	-71.93
868.091	-72.3
868.39	-71.84
868.689	-71.6
[truncated: 47 more rows]

[truncated: 45 more sheets: Conxal01, Conxal02, Conxal03, Conxal04, Conxal05, Ficben01, Ficben02, Ficben03, Ficben04, Ficben05, Myrcor01, Myrcor02, Myrcor03, Myrcor04, Myrcor05, Phocan01, Phocan02, Phocan03, Phocan04, Phocan05 …]
