# Supplementary material for: In a Neotropical Periurban Park, Fruit Consumption by Birds Seems to Be a Random Process
Source: Frontiers journal article supplement (doi:10.3389/fevo.2021.630150), 2021-09-21
Supplement: Data_Sheet_2.XLSX [file Data_Sheet_2.XLSX]

## Sheet: Nutritional content
Family	Species	Carbohidrates (%)	Lipids(%)	Protein (%)	Humidity (%)	Fiber (%)	Ashes (%)
Arecaceae	Phoenix canariensis	45.74	2.1	0.02	37.22	6.43	8.49
Melastomataceae	Conostegia xalapensis	6.53337	1.49	0.0318	84.2544	5.9	1.79039
Moraceae	Ficus benjamina	15.1153	2.44	0.0494	72.3987	7.39	2.60661
Myrtaceae	Syzygium samarangense	17.8519	0.820459	0.006188	78.127	0.548	2.64642
Primulaceae	Myrsine coriacea	43.5737	3.47	0.0207	45.32	2.42	5.19558
Solanaceae	Cestrum sp.	13.85	2.45	0.02254	75.2	2.674	5.8
Solanaceae	Solanum umbellatum	8.79978	1.00342	0.01676	80.7693	1.04452	8.36621
Solanaceae	Witheringia stramonifolia	10.1965	3.8	0.0335	78.23	3.58	4.16
Rosaceae	Rubus adenotrichus	13.8157	1.39094	0.06406	75.045	1.225	8.45925
Verbenaceae	Citharexylum mocinnoi	53.7383	2.3	0.0217	34.28	3.46	6.2
Viscaceae	Phoradendron sp.	45.7436	2.1	0.0164	37.22	8.49	6.43
