# Supplementary material for: In a Neotropical Periurban Park, Fruit Consumption by Birds Seems to Be a Random Process
Source: Frontiers journal article supplement (doi:10.3389/fevo.2021.630150), 2021-09-21
Supplement: Data_Sheet_3.XLSX [file Data_Sheet_3.XLSX]

## Sheet: Abundance
Date	Species	Number ind/3.2 ha
2017-04-28	Ortalis vetula	1
2017-04-28	Myiozetetes similis	2
2017-04-28	Empidonax sp	1
2017-04-28	Ortalis vetula	1
2017-04-28	Dumetella carolinensis	1
2017-04-28	Turdus grayi	1
2017-04-28	Turdus grayi	1
2017-04-28	Myiozetetes similis	1
2017-04-28	Saltator coerulescens	1
2017-04-28	Euphonia elegantissima	1
2017-04-28	Empidonax minimus	1
2017-04-28	Turdus grayi	1
2017-04-28	Melanotis caerulescens	1
2017-04-28	Dumetella carolinensis	1
2017-04-28	Myiozetetes similis	2
2017-04-28	Chlorospingus flavopectus	1
2017-04-28	Ortalis vetula	4
2017-04-28	Chlorospingus flavopectus	1
2017-04-28	Melanotis caerulescens	1
2017-04-28	Euphonia elegantissima	2
2017-04-28	Dumetella carolinensis	1
2017-04-28	Chlorospingus flavopectus	1
2017-04-28	Ortalis vetula	1
2017-04-28	Myiozetetes similis	1
2017-04-28	Empidonax occidentalis	1
2017-04-28	Campylorhynchus zonatus	6
2017-04-28	Turdus grayi	1
2017-04-28	Myiozetetes similis	2
2017-04-28	Campylorhynchus zonatus	2
2017-04-28	Turdus grayi	2
2017-04-28	Campylorhynchus zonatus	1
2017-04-28	Campylorhynchus zonatus	4
2017-04-28	Myiozetetes similis	1
2017-04-28	Pitangus sulphuratus	2
2017-04-28	Myiozetetes similis	1
2017-04-28	Turdus grayi	3
2017-04-28	Euphonia elegantissima	2
2017-04-28	Saltator atriceps	3
2017-04-28	Euphonia elegantissima	2
2017-04-28	Turdus grayi	2
2017-04-28	Empidonax sp.	1
2017-05-16	Campylorhynchus zonatus	2
2017-05-16	Saltator atriceps	2
2017-05-16	Aimohila rufescens	3
2017-05-16	Saltator coerulescens	1
2017-05-16	Melanotis caerulescens	1
2017-05-16	Aimohila rufescens	1
2017-05-16	Saltator atriceps	3
2017-05-16	Myiozetetes similis	1
2017-05-16	Myiozetetes similis	1
2017-05-16	Chlorospingus flavopectus	1
2017-05-16	Euphonia hirundinacea	1
2017-05-16	Myiozetetes similis	2
2017-05-16	Campylorhynchus zonatus	4
2017-05-16	Euphonia hirundinacea	2
2017-05-16	Empidonax occidentalis	1
2017-05-16	Myiozetetes similis	1
2017-05-16	Ortalis vetula	2
2017-05-16	Ortalis vetula	1
2017-05-16	Turdus grayi	1
2017-05-17	Empidonax occidentalis	1
2017-05-17	Empidonax flaviventris	1
2017-05-17	Campylorhynchus zonatus	3
2017-05-17	Momotus coeruliceps	1
2017-05-17	Chlorospingus flavopectus	2
2017-05-17	Empidonax minimus	1
2017-05-17	Euphonia hirundinacea	1
2017-05-17	Melanotis caerulescens	1
2017-05-17	Empidonax sp.	1
2017-05-17	Saltator coerulescens	1
2017-05-17	Ortalis vetula	5
2017-05-17	Euphonia elegantissima	1
2017-05-17	Saltator atriceps	1
2017-08-29	Myiozetetes similis	5
2017-08-29	Turdus grayi	1
2017-08-29	Melospiza lincolnii	2
2017-08-29	Aimophila rufescens	1
2017-08-29	Campylorhynchus zonatus	3
2017-08-29	Empidonax occidentalis	1
2017-08-29	Aimophila rufescens	1
2017-08-29	Ortalis vetula	5
2017-08-29	Momotus coeruliceps	1
2017-08-29	Saltator atriceps	1
2017-08-29	Saltator coerulescens	2
2017-08-29	Myiozetetes similis	3
2017-09-12	Myiozetetes similis	2
2017-09-12	Dumetella carolinensis	1
2017-09-12	Campylorhynchus zonatus	4
2017-09-12	Turdus grayi	1
2017-09-12	Chlorospingus flavopectus	2
2017-09-12	Turdus grayi	1
2017-09-12	Aimophila rufescens	1
2017-09-12	Empidonax occidentalis	1
2017-09-12	Empidonax sp.	1
2017-09-12	Aimophila rufescens	1
2017-09-12	Empidonax flaviventris	1
2017-09-12	Empidonax flaviventris	1
2017-09-12	Dumetella carolinensis	1
2017-09-12	Myiozetetes similis	1
2017-09-12	Campylorhynchus zonatus	2
2017-09-12	Empidonax sp.	1
2017-09-12	Empidonax flaviventris	1
2017-09-17	Melanotis caerulescens	1
2017-09-17	Empidonax sp.	1
2017-09-17	Aimophila rufescens	1
2017-09-17	Myiozetetes similis	1
2017-09-17	Saltator coerulescens	1
2017-09-17	Empidonax occidentalis	1
2017-09-17	Empidonax occidentalis	1
2017-09-17	Empidonax flaviventris	1
2017-09-17	Campylorhynchus zonatus	4
2017-09-17	Empidonax occidentalis	2
2017-09-17	Turdus grayi	1
2017-09-17	Campylorhynchus zonatus	2
