# Supplementary material for: In a Neotropical Periurban Park, Fruit Consumption by Birds Seems to Be a Random Process
Source: Frontiers journal article supplement (doi:10.3389/fevo.2021.630150), 2021-09-21
Supplement: Data_Sheet_4.XLSX [file Data_Sheet_4.XLSX]

## Sheet: Mass
Family	Species	Mass (g)	Mass data obtained from Bird Avian Masses (Dunning 2008)
Cracidae	Ortalis vetula	584
Turdidae	Turdus grayi	65.6
Thraupidae	Saltator atriceps	54.9
Troglodytidae	Campylorhynchus zonatus	34.3
Passerellidae	Chlorospingus flavopectus	24.4
Fringillidae	Euphonia hirundinacea	14
Mimidae	Melanotis caerulescens	67.2
Tyrannidae	Myiozetetes similis	28
Passerellidae	Aimophila rufescens	40.9
Mimidae	Dumetella carolinensis	37.7
Fringillidae	Euphonia affinis	10
Momotidae	Momotus coeruliceps	133
Passerellidae	Melospiza lincolnii	16.6
Tyrannidae	Pitangus sulphuratus	74
Tyrannidae	Empidonax flaviventris	11.6
Thraupidae	Saltator coerulescens	54.9
Cardinalidae	Piranga rubra	28.2
