# Supplementary material for: In a Neotropical Periurban Park, Fruit Consumption by Birds Seems to Be a Random Process
Source: Frontiers journal article supplement (doi:10.3389/fevo.2021.630150), 2021-09-21
Supplement: Data_Sheet_5.XLSX [file Data_Sheet_5.XLSX]

## Sheet: Abundance
Record	Species	Availability %	Number of fruits
1	Cestrum sp.	SA	20
1	Citharexylum mocinnoi	SA	50
2	Citharexylum mocinnoi	MA	310
3	Citharexylum mocinnoi	MA	315
4	Citharexylum mocinnoi	SA	40
1	Conostegia xalapensis	MA	300
2	Conostegia xalapensis	MA	300
3	Conostegia xalapensis	MA	320
4	Conostegia xalapensis	MA	310
5	Conostegia xalapensis	MA	340
6	Conostegia xalapensis	MA	350
7	Conostegia xalapensis	MA	320
8	Conostegia xalapensis	MA	370
9	Conostegia xalapensis	MA	350
10	Conostegia xalapensis	MA	320
11	Conostegia xalapensis	LA	120
12	Conostegia xalapensis	LA	150
13	Conostegia xalapensis	HA	600
14	Conostegia xalapensis	HA	700
15	Conostegia xalapensis	HA	650
16	Conostegia xalapensis	HA	580
17	Conostegia xalapensis	HA	620
18	Conostegia xalapensis	HA	550
19	Conostegia xalapensis	HA	560
20	Conostegia xalapensis	HA	450
21	Conostegia xalapensis	HA	580
22	Conostegia xalapensis	HA	450
23	Conostegia xalapensis	HA	570
24	Conostegia xalapensis	MA	600
25	Conostegia xalapensis	SA	65
26	Conostegia xalapensis	HA	450
27	Conostegia xalapensis	SA	45
28	Conostegia xalapensis	HA	480
29	Conostegia xalapensis	MA	500
1	Ficus benjamina	HA	1000
2	Ficus benjamina	HA	1500
1	Phoenix canarensis	MA	60
2	Phoenix canarensis	MA	70
3	Phoenix canarensis	MA	60
4	Phoenix canarensis	MA	50
5	Phoenix canarensis	MA	45
6	Phoenix canarensis	SA	50
7	Phoenix canarensis	SA	45
8	Phoenix canarensis	SA	30
9	Phoenix canarensis	LA	105
10	Phoenix canarensis	LA	120
11	Phoenix canarensis	SA	35
12	Phoenix canarensis	HA	410
13	Phoenix canarensis	HA	420
14	Phoenix canarensis	HA	450
15	Phoenix canarensis	HA	420
16	Phoenix canarensis	HA	45
17	Phoenix canarensis	HA	35
18	Phoenix canarensis	SA	30
19	Phoenix canarensis	SA	50
20	Phoenix canarensis	SA	45
21	Phoenix canarensis	SA	40
22	Phoenix canarensis	SA	25
23	Phoenix canarensis	SA	30
24	Phoenix canarensis	SA	45
25	Phoenix canarensis	LA	105
26	Phoenix canarensis	LA	110
27	Phoenix canarensis	MA	250
28	Phoenix canarensis	MA	300
29	Phoenix canarensis	MA	250
30	Phoenix canarensis	MA	280
31	Phoenix canarensis	MA	270
32	Phoenix canarensis	SA	50
33	Phoenix canarensis	SA	50
34	Phoenix canarensis	SA	45
35	Phoenix canarensis	LA	120
36	Phoenix canarensis	LA	110
37	Phoenix canarensis	MA	270
38	Phoenix canarensis	MA	250
39	Phoenix canarensis	MA	225
40	Phoenix canarensis	MA	220
41	Phoenix canarensis	MA	210
1	Myrsine coriaceae	HA	700
2	Myrsine coriaceae	HA	850
4	Myrsine coriaceae	MA	1000
5	Myrsine coriaceae	HA	800
3	Myrsine coriaceae	HA	910
1	Rubus adenotrichus	SA	38
1	Witheringia stramonifolia	SA	73
2	Witheringia stramonifolia	SA	45
