# Supplementary material for: In a Neotropical Periurban Park, Fruit Consumption by Birds Seems to Be a Random Process
Source: Frontiers journal article supplement (doi:10.3389/fevo.2021.630150), 2021-09-21
Supplement: Data_Sheet_6.XLSX [file Data_Sheet_6.XLSX]

## Sheet: fruit_diam
Family	Species	Diameter (mm)
Arecaceae	Phoenix canariensis	9.88
Arecaceae	Phoenix canariensis	9.32
Arecaceae	Phoenix canariensis	9.52
Arecaceae	Phoenix canariensis	9.45
Arecaceae	Phoenix canariensis	9.39
Arecaceae	Phoenix canariensis	9.39
Arecaceae	Phoenix canariensis	8.67
Arecaceae	Phoenix canariensis	10.09
Arecaceae	Phoenix canariensis	8.45
Arecaceae	Phoenix canariensis	9.33
Arecaceae	Phoenix canariensis	8.62
Arecaceae	Phoenix canariensis	9.5
Arecaceae	Phoenix canariensis	9.13
Arecaceae	Phoenix canariensis	8.27
Arecaceae	Phoenix canariensis	10.15
Melastomataceae	Conostegia xalapensis	7.05
Melastomataceae	Conostegia xalapensis	7.6
Melastomataceae	Conostegia xalapensis	7.58
Melastomataceae	Conostegia xalapensis	7.32
Melastomataceae	Conostegia xalapensis	6.44
Melastomataceae	Conostegia xalapensis	6.45
Melastomataceae	Conostegia xalapensis	6.81
Melastomataceae	Conostegia xalapensis	6.89
Melastomataceae	Conostegia xalapensis	7.26
Melastomataceae	Conostegia xalapensis	6.76
Melastomataceae	Conostegia xalapensis	7.28
Melastomataceae	Conostegia xalapensis	7.11
Melastomataceae	Conostegia xalapensis	6.72
Melastomataceae	Conostegia xalapensis	7.14
Melastomataceae	Conostegia xalapensis	7.42
Moraceae	Ficus benjamina	8.42
Moraceae	Ficus benjamina	7.72
Moraceae	Ficus benjamina	8.89
Moraceae	Ficus benjamina	10.63
Moraceae	Ficus benjamina	8.24
Moraceae	Ficus benjamina	9.52
Moraceae	Ficus benjamina	6.98
Moraceae	Ficus benjamina	6.6
Moraceae	Ficus benjamina	9.08
Moraceae	Ficus benjamina	8.13
Moraceae	Ficus benjamina	8.66
Moraceae	Ficus benjamina	7.45
Moraceae	Ficus benjamina	8.64
Moraceae	Ficus benjamina	8.47
Moraceae	Ficus benjamina	7
Myrtaceae	Syzygium samarangense	19.4
Myrtaceae	Syzygium samarangense	14.7
Myrtaceae	Syzygium samarangense	17
Myrtaceae	Syzygium samarangense	19.6
Myrtaceae	Syzygium samarangense	20.3
Myrtaceae	Syzygium samarangense	22.1
Myrtaceae	Syzygium samarangense	22.5
Myrtaceae	Syzygium samarangense	18.8
Myrtaceae	Syzygium samarangense	21.5
Myrtaceae	Syzygium samarangense	18.7
Myrtaceae	Syzygium samarangense	19.33
Myrtaceae	Syzygium samarangense	18.8
Myrtaceae	Syzygium samarangense	13.52
Myrtaceae	Syzygium samarangense	14.51
Myrtaceae	Syzygium samarangense	20.7
Primulaceae	Myrsine coriacea	4.57
Primulaceae	Myrsine coriacea	4
Primulaceae	Myrsine coriacea	3.51
Primulaceae	Myrsine coriacea	4.2
Primulaceae	Myrsine coriacea	3.6
Primulaceae	Myrsine coriacea	3
Primulaceae	Myrsine coriacea	4.47
Primulaceae	Myrsine coriacea	4.09
Primulaceae	Myrsine coriacea	4.25
Primulaceae	Myrsine coriacea	5.2
Primulaceae	Myrsine coriacea	3.25
Primulaceae	Myrsine coriacea	4.01
Primulaceae	Myrsine coriacea	3.8
Primulaceae	Myrsine coriacea	4.76
Primulaceae	Myrsine coriacea	4.38
Solanaceae	Cestrum sp.	8.45
Solanaceae	Cestrum sp.	8.48
Solanaceae	Cestrum sp.	10.1
Solanaceae	Cestrum sp.	7.7
Solanaceae	Cestrum sp.	7.56
Solanaceae	Cestrum sp.	8.46
Solanaceae	Cestrum sp.	10.21
Solanaceae	Cestrum sp.	8.54
Solanaceae	Cestrum sp.	7.92
Solanaceae	Cestrum sp.	7.56
Solanaceae	Cestrum sp.	8.06
Solanaceae	Cestrum sp.	6.83
Solanaceae	Cestrum sp.	8.67
Solanaceae	Cestrum sp.	10.33
Solanaceae	Cestrum sp.	8.04
Solanaceae	Solanum umbellatum	11.92
Solanaceae	Solanum umbellatum	11.39
Solanaceae	Solanum umbellatum	11.55
Solanaceae	Solanum umbellatum	12.7
Solanaceae	Solanum umbellatum	12.54
Solanaceae	Solanum umbellatum	12.08
Solanaceae	Solanum umbellatum	10.5
Solanaceae	Solanum umbellatum	11.84
Solanaceae	Solanum umbellatum	11.39
Solanaceae	Solanum umbellatum	11.62
Solanaceae	Solanum umbellatum	11.32
Solanaceae	Solanum umbellatum	11.38
Solanaceae	Solanum umbellatum	10.26
Solanaceae	Solanum umbellatum	10.58
Solanaceae	Solanum umbellatum	11.2
Solanaceae	Witheringia stramonifolia	7.09
Solanaceae	Witheringia stramonifolia	7.01
Solanaceae	Witheringia stramonifolia	6.73
Solanaceae	Witheringia stramonifolia	6.58
Solanaceae	Witheringia stramonifolia	6.65
Solanaceae	Witheringia stramonifolia	6.76
Solanaceae	Witheringia stramonifolia	6.78
Solanaceae	Witheringia stramonifolia	6.73
Solanaceae	Witheringia stramonifolia	6.85
Solanaceae	Witheringia stramonifolia	6.88
Solanaceae	Witheringia stramonifolia	6.67
Solanaceae	Witheringia stramonifolia	6.56
Solanaceae	Witheringia stramonifolia	6.77
Solanaceae	Witheringia stramonifolia	6.36
Solanaceae	Witheringia stramonifolia	6.71
Rosaceae	Rubus adenotrichus	6.17
Rosaceae	Rubus adenotrichus	6.11
Rosaceae	Rubus adenotrichus	5.38
Rosaceae	Rubus adenotrichus	6.14
Rosaceae	Rubus adenotrichus	5.96
Rosaceae	Rubus adenotrichus	5.89
Rosaceae	Rubus adenotrichus	6.54
Rosaceae	Rubus adenotrichus	6
Rosaceae	Rubus adenotrichus	5.82
Rosaceae	Rubus adenotrichus	6.19
Rosaceae	Rubus adenotrichus	7.16
Rosaceae	Rubus adenotrichus	6.2
Rosaceae	Rubus adenotrichus	5.38
Rosaceae	Rubus adenotrichus	6.44
Rosaceae	Rubus adenotrichus	5.13
Verbenaceae	Citharexylum mocinnoi	12.96
Verbenaceae	Citharexylum mocinnoi	13.64
Verbenaceae	Citharexylum mocinnoi	12.09
Verbenaceae	Citharexylum mocinnoi	14.19
Verbenaceae	Citharexylum mocinnoi	12.43
Verbenaceae	Citharexylum mocinnoi	13.04
Verbenaceae	Citharexylum mocinnoi	14.12
Verbenaceae	Citharexylum mocinnoi	11.4
Verbenaceae	Citharexylum mocinnoi	13.51
Verbenaceae	Citharexylum mocinnoi	9.88
Verbenaceae	Citharexylum mocinnoi	12.95
Verbenaceae	Citharexylum mocinnoi	10.8
Verbenaceae	Citharexylum mocinnoi	12.66
Verbenaceae	Citharexylum mocinnoi	10.71
Verbenaceae	Citharexylum mocinnoi	11.35
Viscaceae	Phoradendron sp.	5.367
Viscaceae	Phoradendron sp.	4.52
Viscaceae	Phoradendron sp.	5.82
Viscaceae	Phoradendron sp.	4.82
Viscaceae	Phoradendron sp.	4.49
Viscaceae	Phoradendron sp.	5.18
Viscaceae	Phoradendron sp.	5.97
Viscaceae	Phoradendron sp.	5.42
Viscaceae	Phoradendron sp.	5.16
Viscaceae	Phoradendron sp.	5.9
Viscaceae	Phoradendron sp.	5.68
Viscaceae	Phoradendron sp.	5.37
Viscaceae	Phoradendron sp.	5.15
Viscaceae	Phoradendron sp.	5.07
Viscaceae	Phoradendron sp.	6.17
